# Supplementary material
Source: publisher site journal article supplement (https://www.dovepress.com/article/508593)
Supplement: Supplementary file 1 [file get_supplementary_file.php]

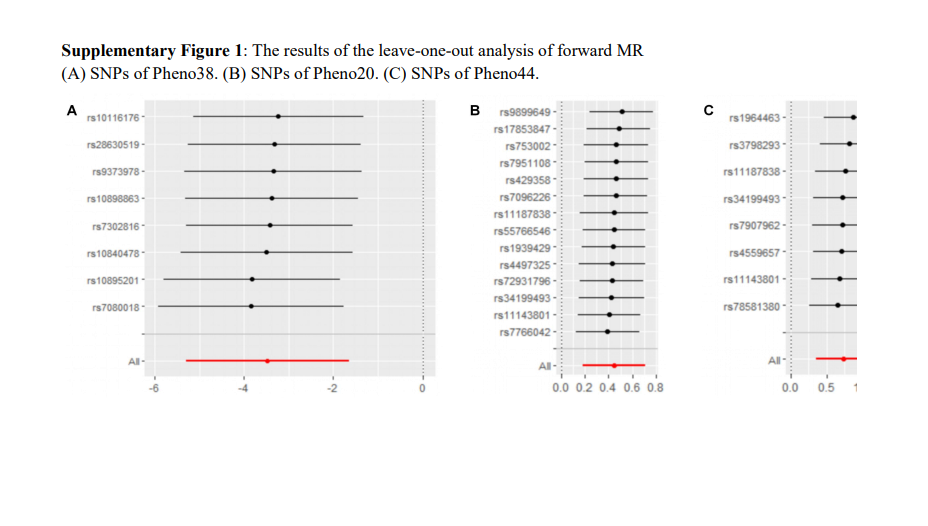

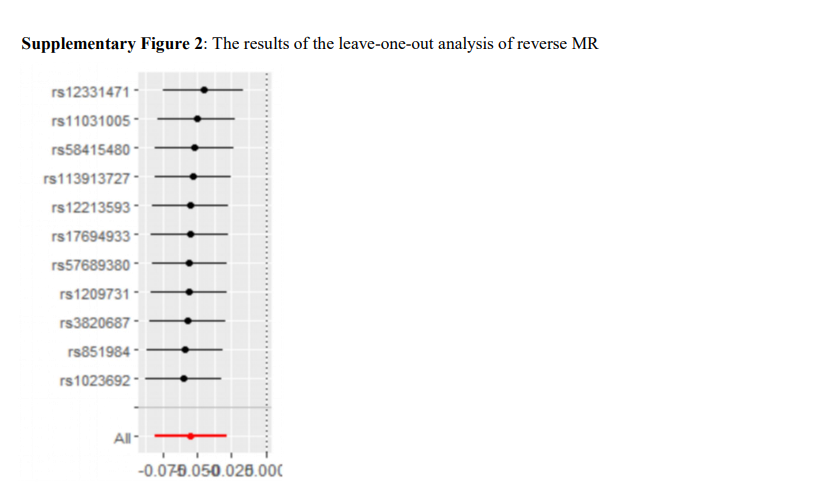


| **Supplementary Table 1: The rsfMRI phenotypes list** | | | | |
| --- | --- | --- | --- | --- |
| **brain functional networks** | **Pheno_ID** | **Name** | **Location** | **Network** |
| Edge (Functional connectivity) | Pheno1 | Net25_Pair1_2 | (Cerebellum|Precuneus)&(Occipital) | (Default_mode)&(Visual|Attention) |
| Edge (Functional connectivity) | Pheno2 | Net25_Pair1_3 | (Cerebellum|Precuneus)&(Pariental) | (Default_mode)&(Attention|Salience|Central_executive) |
| Edge (Functional connectivity) | Pheno3 | Net25_Pair2_3 | (Occipital)&(Pariental) | (Visual|Attention)&(Attention|Salience|Central_executive) |
| Edge (Functional connectivity) | Pheno4 | Net25_Pair1_4 | (Cerebellum|Precuneus)&(Calcarine|Lingual|Cuneus) | (Default_mode)&(Visual) |
| Edge (Functional connectivity) | Pheno5 | Net25_Pair2_4 | (Occipital)&(Calcarine|Lingual|Cuneus) | (Visual|Attention)&(Visual) |
| Edge (Functional connectivity) | Pheno6 | Net25_Pair3_4 | (Pariental)&(Calcarine|Lingual|Cuneus) | (Attention|Salience|Central_executive)&(Visual) |
| Edge (Functional connectivity) | Pheno7 | Net25_Pair1_5 | (Cerebellum|Precuneus)&(Parietal|Cerebellum) | (Default_mode)&(Central_executive|Attention|Default_mode) |
| Edge (Functional connectivity) | Pheno8 | Net25_Pair2_5 | (Occipital)&(Parietal|Cerebellum) | (Visual|Attention)&(Central_executive|Attention|Default_mode) |
| Edge (Functional connectivity) | Pheno9 | Net25_Pair3_5 | (Pariental)&(Parietal|Cerebellum) | (Attention|Salience|Central_executive)&(Central_executive|Attention|Default_mode) |
| Edge (Functional connectivity) | Pheno10 | Net25_Pair4_5 | (Calcarine|Lingual|Cuneus)&(Parietal|Cerebellum) | (Visual)&(Central_executive|Attention|Default_mode) |
| Edge (Functional connectivity) | Pheno11 | Net25_Pair1_6 | (Cerebellum|Precuneus)&(Frontal) | (Default_mode)&(Default_mode|Central_executive) |
| Edge (Functional connectivity) | Pheno12 | Net25_Pair2_6 | (Occipital)&(Frontal) | (Visual|Attention)&(Default_mode|Central_executive) |
| Edge (Functional connectivity) | Pheno13 | Net25_Pair3_6 | (Pariental)&(Frontal) | (Attention|Salience|Central_executive)&(Default_mode|Central_executive) |
| Edge (Functional connectivity) | Pheno14 | Net25_Pair4_6 | (Calcarine|Lingual|Cuneus)&(Frontal) | (Visual)&(Default_mode|Central_executive) |
| Edge (Functional connectivity) | Pheno15 | Net25_Pair5_6 | (Parietal|Cerebellum)&(Frontal) | (Central_executive|Attention|Default_mode)&(Default_mode|Central_executive) |
| Edge (Functional connectivity) | Pheno16 | Net25_Pair1_7 | (Cerebellum|Precuneus)&(Precuneus|Occipital) | (Default_mode)&(Default_mode|Central_executive) |
| Edge (Functional connectivity) | Pheno17 | Net25_Pair2_7 | (Occipital)&(Precuneus|Occipital) | (Visual|Attention)&(Default_mode|Central_executive) |
| Edge (Functional connectivity) | Pheno18 | Net25_Pair3_7 | (Pariental)&(Precuneus|Occipital) | (Attention|Salience|Central_executive)&(Default_mode|Central_executive) |
| Edge (Functional connectivity) | Pheno19 | Net25_Pair4_7 | (Calcarine|Lingual|Cuneus)&(Precuneus|Occipital) | (Visual)&(Default_mode|Central_executive) |
| Edge (Functional connectivity) | Pheno20 | Net25_Pair5_7 | (Parietal|Cerebellum)&(Precuneus|Occipital) | (Central_executive|Attention|Default_mode)&(Default_mode|Central_executive) |
| Edge (Functional connectivity) | Pheno21 | Net25_Pair6_7 | (Frontal)&(Precuneus|Occipital) | (Default_mode|Central_executive)&(Default_mode|Central_executive) |
| Edge (Functional connectivity) | Pheno22 | Net25_Pair1_8 | (Cerebellum|Precuneus)&(Occipital) | (Default_mode)&(Visual) |
| Edge (Functional connectivity) | Pheno23 | Net25_Pair2_8 | (Occipital)&(Occipital) | (Visual|Attention)&(Visual) |
| Edge (Functional connectivity) | Pheno24 | Net25_Pair3_8 | (Pariental)&(Occipital) | (Attention|Salience|Central_executive)&(Visual) |
| Edge (Functional connectivity) | Pheno25 | Net25_Pair4_8 | (Calcarine|Lingual|Cuneus)&(Occipital) | (Visual)&(Visual) |
| Edge (Functional connectivity) | Pheno26 | Net25_Pair5_8 | (Parietal|Cerebellum)&(Occipital) | (Central_executive|Attention|Default_mode)&(Visual) |
| Edge (Functional connectivity) | Pheno27 | Net25_Pair6_8 | (Frontal)&(Occipital) | (Default_mode|Central_executive)&(Visual) |
| Edge (Functional connectivity) | Pheno28 | Net25_Pair7_8 | (Precuneus|Occipital)&(Occipital) | (Default_mode|Central_executive)&(Visual) |
| Edge (Functional connectivity) | Pheno29 | Net25_Pair1_9 | (Cerebellum|Precuneus)&(Parietal|Temporal) | (Default_mode)&(Default_mode|Central_executive) |
| Edge (Functional connectivity) | Pheno30 | Net25_Pair2_9 | (Occipital)&(Parietal|Temporal) | (Visual|Attention)&(Default_mode|Central_executive) |
| Edge (Functional connectivity) | Pheno31 | Net25_Pair3_9 | (Pariental)&(Parietal|Temporal) | (Attention|Salience|Central_executive)&(Default_mode|Central_executive) |
| Edge (Functional connectivity) | Pheno32 | Net25_Pair4_9 | (Calcarine|Lingual|Cuneus)&(Parietal|Temporal) | (Visual)&(Default_mode|Central_executive) |
| Edge (Functional connectivity) | Pheno33 | Net25_Pair5_9 | (Parietal|Cerebellum)&(Parietal|Temporal) | (Central_executive|Attention|Default_mode)&(Default_mode|Central_executive) |
| Edge (Functional connectivity) | Pheno34 | Net25_Pair6_9 | (Frontal)&(Parietal|Temporal) | (Default_mode|Central_executive)&(Default_mode|Central_executive) |
| Edge (Functional connectivity) | Pheno35 | Net25_Pair7_9 | (Precuneus|Occipital)&(Parietal|Temporal) | (Default_mode|Central_executive)&(Default_mode|Central_executive) |
| Edge (Functional connectivity) | Pheno36 | Net25_Pair8_9 | (Occipital)&(Parietal|Temporal) | (Visual)&(Default_mode|Central_executive) |
| Edge (Functional connectivity) | Pheno37 | Net25_Pair1_10 | (Cerebellum|Precuneus)&(Postcentral|Precentral) | (Default_mode)&(Motor) |
| Edge (Functional connectivity) | Pheno38 | Net25_Pair2_10 | (Occipital)&(Postcentral|Precentral) | (Visual|Attention)&(Motor) |
| Edge (Functional connectivity) | Pheno39 | Net25_Pair3_10 | (Pariental)&(Postcentral|Precentral) | (Attention|Salience|Central_executive)&(Motor) |
| Edge (Functional connectivity) | Pheno40 | Net25_Pair4_10 | (Calcarine|Lingual|Cuneus)&(Postcentral|Precentral) | (Visual)&(Motor) |
| Edge (Functional connectivity) | Pheno41 | Net25_Pair5_10 | (Parietal|Cerebellum)&(Postcentral|Precentral) | (Central_executive|Attention|Default_mode)&(Motor) |
| Edge (Functional connectivity) | Pheno42 | Net25_Pair6_10 | (Frontal)&(Postcentral|Precentral) | (Default_mode|Central_executive)&(Motor) |
| Edge (Functional connectivity) | Pheno43 | Net25_Pair7_10 | (Precuneus|Occipital)&(Postcentral|Precentral) | (Default_mode|Central_executive)&(Motor) |
| Edge (Functional connectivity) | Pheno44 | Net25_Pair8_10 | (Occipital)&(Postcentral|Precentral) | (Visual)&(Motor) |
| Edge (Functional connectivity) | Pheno45 | Net25_Pair9_10 | (Parietal|Temporal)&(Postcentral|Precentral) | (Default_mode|Central_executive)&(Motor) |
| Edge (Functional connectivity) | Pheno46 | Net25_Pair1_11 | (Cerebellum|Precuneus)&(Postcentral|Precentral) | (Default_mode)&(Motor) |
| Edge (Functional connectivity) | Pheno47 | Net25_Pair2_11 | (Occipital)&(Postcentral|Precentral) | (Visual|Attention)&(Motor) |
| Edge (Functional connectivity) | Pheno48 | Net25_Pair3_11 | (Pariental)&(Postcentral|Precentral) | (Attention|Salience|Central_executive)&(Motor) |
| Edge (Functional connectivity) | Pheno49 | Net25_Pair4_11 | (Calcarine|Lingual|Cuneus)&(Postcentral|Precentral) | (Visual)&(Motor) |
| Edge (Functional connectivity) | Pheno50 | Net25_Pair5_11 | (Parietal|Cerebellum)&(Postcentral|Precentral) | (Central_executive|Attention|Default_mode)&(Motor) |
| Edge (Functional connectivity) | Pheno51 | Net25_Pair6_11 | (Frontal)&(Postcentral|Precentral) | (Default_mode|Central_executive)&(Motor) |
| Edge (Functional connectivity) | Pheno52 | Net25_Pair7_11 | (Precuneus|Occipital)&(Postcentral|Precentral) | (Default_mode|Central_executive)&(Motor) |
| Edge (Functional connectivity) | Pheno53 | Net25_Pair8_11 | (Occipital)&(Postcentral|Precentral) | (Visual)&(Motor) |
| Edge (Functional connectivity) | Pheno54 | Net25_Pair9_11 | (Parietal|Temporal)&(Postcentral|Precentral) | (Default_mode|Central_executive)&(Motor) |
| Edge (Functional connectivity) | Pheno55 | Net25_Pair10_11 | (Postcentral|Precentral)&(Postcentral|Precentral) | (Motor)&(Motor) |
| Edge (Functional connectivity) | Pheno56 | Net25_Pair1_12 | (Cerebellum|Precuneus)&(Paracentral|Postcentral) | (Default_mode)&(Motor) |
| Edge (Functional connectivity) | Pheno57 | Net25_Pair2_12 | (Occipital)&(Paracentral|Postcentral) | (Visual|Attention)&(Motor) |
| Edge (Functional connectivity) | Pheno58 | Net25_Pair3_12 | (Pariental)&(Paracentral|Postcentral) | (Attention|Salience|Central_executive)&(Motor) |
| Edge (Functional connectivity) | Pheno59 | Net25_Pair4_12 | (Calcarine|Lingual|Cuneus)&(Paracentral|Postcentral) | (Visual)&(Motor) |
| Edge (Functional connectivity) | Pheno60 | Net25_Pair5_12 | (Parietal|Cerebellum)&(Paracentral|Postcentral) | (Central_executive|Attention|Default_mode)&(Motor) |
| Edge (Functional connectivity) | Pheno61 | Net25_Pair6_12 | (Frontal)&(Paracentral|Postcentral) | (Default_mode|Central_executive)&(Motor) |
| Edge (Functional connectivity) | Pheno62 | Net25_Pair7_12 | (Precuneus|Occipital)&(Paracentral|Postcentral) | (Default_mode|Central_executive)&(Motor) |
| Edge (Functional connectivity) | Pheno63 | Net25_Pair8_12 | (Occipital)&(Paracentral|Postcentral) | (Visual)&(Motor) |
| Edge (Functional connectivity) | Pheno64 | Net25_Pair9_12 | (Parietal|Temporal)&(Paracentral|Postcentral) | (Default_mode|Central_executive)&(Motor) |
| Edge (Functional connectivity) | Pheno65 | Net25_Pair10_12 | (Postcentral|Precentral)&(Paracentral|Postcentral) | (Motor)&(Motor) |
| Edge (Functional connectivity) | Pheno66 | Net25_Pair11_12 | (Postcentral|Precentral)&(Paracentral|Postcentral) | (Motor)&(Motor) |
| Edge (Functional connectivity) | Pheno67 | Net25_Pair1_13 | (Cerebellum|Precuneus)&(Frontal|Supp_Motor_Area|Temporal) | (Default_mode)&(Default_mode|Salience) |
| Edge (Functional connectivity) | Pheno68 | Net25_Pair2_13 | (Occipital)&(Frontal|Supp_Motor_Area|Temporal) | (Visual|Attention)&(Default_mode|Salience) |
| Edge (Functional connectivity) | Pheno69 | Net25_Pair3_13 | (Pariental)&(Frontal|Supp_Motor_Area|Temporal) | (Attention|Salience|Central_executive)&(Default_mode|Salience) |
| Edge (Functional connectivity) | Pheno70 | Net25_Pair4_13 | (Calcarine|Lingual|Cuneus)&(Frontal|Supp_Motor_Area|Temporal) | (Visual)&(Default_mode|Salience) |
| Edge (Functional connectivity) | Pheno71 | Net25_Pair5_13 | (Parietal|Cerebellum)&(Frontal|Supp_Motor_Area|Temporal) | (Central_executive|Attention|Default_mode)&(Default_mode|Salience) |
| Edge (Functional connectivity) | Pheno72 | Net25_Pair6_13 | (Frontal)&(Frontal|Supp_Motor_Area|Temporal) | (Default_mode|Central_executive)&(Default_mode|Salience) |
| Edge (Functional connectivity) | Pheno73 | Net25_Pair7_13 | (Precuneus|Occipital)&(Frontal|Supp_Motor_Area|Temporal) | (Default_mode|Central_executive)&(Default_mode|Salience) |
| Edge (Functional connectivity) | Pheno74 | Net25_Pair8_13 | (Occipital)&(Frontal|Supp_Motor_Area|Temporal) | (Visual)&(Default_mode|Salience) |
| Edge (Functional connectivity) | Pheno75 | Net25_Pair9_13 | (Parietal|Temporal)&(Frontal|Supp_Motor_Area|Temporal) | (Default_mode|Central_executive)&(Default_mode|Salience) |
| Edge (Functional connectivity) | Pheno76 | Net25_Pair10_13 | (Postcentral|Precentral)&(Frontal|Supp_Motor_Area|Temporal) | (Motor)&(Default_mode|Salience) |
| Edge (Functional connectivity) | Pheno77 | Net25_Pair11_13 | (Postcentral|Precentral)&(Frontal|Supp_Motor_Area|Temporal) | (Motor)&(Default_mode|Salience) |
| Edge (Functional connectivity) | Pheno78 | Net25_Pair12_13 | (Paracentral|Postcentral)&(Frontal|Supp_Motor_Area|Temporal) | (Motor)&(Default_mode|Salience) |
| Edge (Functional connectivity) | Pheno79 | Net25_Pair1_14 | (Cerebellum|Precuneus)&(Cingulate|Frontal) | (Default_mode)&(Default_mode|Central_executive|Salience) |
| Edge (Functional connectivity) | Pheno80 | Net25_Pair2_14 | (Occipital)&(Cingulate|Frontal) | (Visual|Attention)&(Default_mode|Central_executive|Salience) |
| Edge (Functional connectivity) | Pheno81 | Net25_Pair3_14 | (Pariental)&(Cingulate|Frontal) | (Attention|Salience|Central_executive)&(Default_mode|Central_executive|Salience) |
| Edge (Functional connectivity) | Pheno82 | Net25_Pair4_14 | (Calcarine|Lingual|Cuneus)&(Cingulate|Frontal) | (Visual)&(Default_mode|Central_executive|Salience) |
| Edge (Functional connectivity) | Pheno83 | Net25_Pair5_14 | (Parietal|Cerebellum)&(Cingulate|Frontal) | (Central_executive|Attention|Default_mode)&(Default_mode|Central_executive|Salience) |
| Edge (Functional connectivity) | Pheno84 | Net25_Pair6_14 | (Frontal)&(Cingulate|Frontal) | (Default_mode|Central_executive)&(Default_mode|Central_executive|Salience) |
| Edge (Functional connectivity) | Pheno85 | Net25_Pair7_14 | (Precuneus|Occipital)&(Cingulate|Frontal) | (Default_mode|Central_executive)&(Default_mode|Central_executive|Salience) |
| Edge (Functional connectivity) | Pheno86 | Net25_Pair8_14 | (Occipital)&(Cingulate|Frontal) | (Visual)&(Default_mode|Central_executive|Salience) |
| Edge (Functional connectivity) | Pheno87 | Net25_Pair9_14 | (Parietal|Temporal)&(Cingulate|Frontal) | (Default_mode|Central_executive)&(Default_mode|Central_executive|Salience) |
| Edge (Functional connectivity) | Pheno88 | Net25_Pair10_14 | (Postcentral|Precentral)&(Cingulate|Frontal) | (Motor)&(Default_mode|Central_executive|Salience) |
| Edge (Functional connectivity) | Pheno89 | Net25_Pair11_14 | (Postcentral|Precentral)&(Cingulate|Frontal) | (Motor)&(Default_mode|Central_executive|Salience) |
| Edge (Functional connectivity) | Pheno90 | Net25_Pair12_14 | (Paracentral|Postcentral)&(Cingulate|Frontal) | (Motor)&(Default_mode|Central_executive|Salience) |
| Edge (Functional connectivity) | Pheno91 | Net25_Pair13_14 | (Frontal|Supp_Motor_Area|Temporal)&(Cingulate|Frontal) | (Default_mode|Salience)&(Default_mode|Central_executive|Salience) |
| Edge (Functional connectivity) | Pheno92 | Net25_Pair1_15 | (Cerebellum|Precuneus)&(Cerebellum) | (Default_mode)&(Subcortical-cerebellum) |
| Edge (Functional connectivity) | Pheno93 | Net25_Pair2_15 | (Occipital)&(Cerebellum) | (Visual|Attention)&(Subcortical-cerebellum) |
| Edge (Functional connectivity) | Pheno94 | Net25_Pair3_15 | (Pariental)&(Cerebellum) | (Attention|Salience|Central_executive)&(Subcortical-cerebellum) |
| Edge (Functional connectivity) | Pheno95 | Net25_Pair4_15 | (Calcarine|Lingual|Cuneus)&(Cerebellum) | (Visual)&(Subcortical-cerebellum) |
| Edge (Functional connectivity) | Pheno96 | Net25_Pair5_15 | (Parietal|Cerebellum)&(Cerebellum) | (Central_executive|Attention|Default_mode)&(Subcortical-cerebellum) |
| Edge (Functional connectivity) | Pheno97 | Net25_Pair6_15 | (Frontal)&(Cerebellum) | (Default_mode|Central_executive)&(Subcortical-cerebellum) |
| Edge (Functional connectivity) | Pheno98 | Net25_Pair7_15 | (Precuneus|Occipital)&(Cerebellum) | (Default_mode|Central_executive)&(Subcortical-cerebellum) |
| Edge (Functional connectivity) | Pheno99 | Net25_Pair8_15 | (Occipital)&(Cerebellum) | (Visual)&(Subcortical-cerebellum) |
| Edge (Functional connectivity) | Pheno100 | Net25_Pair9_15 | (Parietal|Temporal)&(Cerebellum) | (Default_mode|Central_executive)&(Subcortical-cerebellum) |
| Edge (Functional connectivity) | Pheno101 | Net25_Pair10_15 | (Postcentral|Precentral)&(Cerebellum) | (Motor)&(Subcortical-cerebellum) |
| Edge (Functional connectivity) | Pheno102 | Net25_Pair11_15 | (Postcentral|Precentral)&(Cerebellum) | (Motor)&(Subcortical-cerebellum) |
| Edge (Functional connectivity) | Pheno103 | Net25_Pair12_15 | (Paracentral|Postcentral)&(Cerebellum) | (Motor)&(Subcortical-cerebellum) |
| Edge (Functional connectivity) | Pheno104 | Net25_Pair13_15 | (Frontal|Supp_Motor_Area|Temporal)&(Cerebellum) | (Default_mode|Salience)&(Subcortical-cerebellum) |
| Edge (Functional connectivity) | Pheno105 | Net25_Pair14_15 | (Cingulate|Frontal)&(Cerebellum) | (Default_mode|Central_executive|Salience)&(Subcortical-cerebellum) |
| Edge (Functional connectivity) | Pheno106 | Net25_Pair1_16 | (Cerebellum|Precuneus)&(Frontal) | (Default_mode)&(Salience|Central_executive) |
| Edge (Functional connectivity) | Pheno107 | Net25_Pair2_16 | (Occipital)&(Frontal) | (Visual|Attention)&(Salience|Central_executive) |
| Edge (Functional connectivity) | Pheno108 | Net25_Pair3_16 | (Pariental)&(Frontal) | (Attention|Salience|Central_executive)&(Salience|Central_executive) |
| Edge (Functional connectivity) | Pheno109 | Net25_Pair4_16 | (Calcarine|Lingual|Cuneus)&(Frontal) | (Visual)&(Salience|Central_executive) |
| Edge (Functional connectivity) | Pheno110 | Net25_Pair5_16 | (Parietal|Cerebellum)&(Frontal) | (Central_executive|Attention|Default_mode)&(Salience|Central_executive) |
| Edge (Functional connectivity) | Pheno111 | Net25_Pair6_16 | (Frontal)&(Frontal) | (Default_mode|Central_executive)&(Salience|Central_executive) |
| Edge (Functional connectivity) | Pheno112 | Net25_Pair7_16 | (Precuneus|Occipital)&(Frontal) | (Default_mode|Central_executive)&(Salience|Central_executive) |
| Edge (Functional connectivity) | Pheno113 | Net25_Pair8_16 | (Occipital)&(Frontal) | (Visual)&(Salience|Central_executive) |
| Edge (Functional connectivity) | Pheno114 | Net25_Pair9_16 | (Parietal|Temporal)&(Frontal) | (Default_mode|Central_executive)&(Salience|Central_executive) |
| Edge (Functional connectivity) | Pheno115 | Net25_Pair10_16 | (Postcentral|Precentral)&(Frontal) | (Motor)&(Salience|Central_executive) |
| Edge (Functional connectivity) | Pheno116 | Net25_Pair11_16 | (Postcentral|Precentral)&(Frontal) | (Motor)&(Salience|Central_executive) |
| Edge (Functional connectivity) | Pheno117 | Net25_Pair12_16 | (Paracentral|Postcentral)&(Frontal) | (Motor)&(Salience|Central_executive) |
| Edge (Functional connectivity) | Pheno118 | Net25_Pair13_16 | (Frontal|Supp_Motor_Area|Temporal)&(Frontal) | (Default_mode|Salience)&(Salience|Central_executive) |
| Edge (Functional connectivity) | Pheno119 | Net25_Pair14_16 | (Cingulate|Frontal)&(Frontal) | (Default_mode|Central_executive|Salience)&(Salience|Central_executive) |
| Edge (Functional connectivity) | Pheno120 | Net25_Pair15_16 | (Cerebellum)&(Frontal) | (Subcortical-cerebellum)&(Salience|Central_executive) |
| Edge (Functional connectivity) | Pheno121 | Net25_Pair1_17 | (Cerebellum|Precuneus)&(Temporal) | (Default_mode)&(Default_mode|Motor) |
| Edge (Functional connectivity) | Pheno122 | Net25_Pair2_17 | (Occipital)&(Temporal) | (Visual|Attention)&(Default_mode|Motor) |
| Edge (Functional connectivity) | Pheno123 | Net25_Pair3_17 | (Pariental)&(Temporal) | (Attention|Salience|Central_executive)&(Default_mode|Motor) |
| Edge (Functional connectivity) | Pheno124 | Net25_Pair4_17 | (Calcarine|Lingual|Cuneus)&(Temporal) | (Visual)&(Default_mode|Motor) |
| Edge (Functional connectivity) | Pheno125 | Net25_Pair5_17 | (Parietal|Cerebellum)&(Temporal) | (Central_executive|Attention|Default_mode)&(Default_mode|Motor) |
| Edge (Functional connectivity) | Pheno126 | Net25_Pair6_17 | (Frontal)&(Temporal) | (Default_mode|Central_executive)&(Default_mode|Motor) |
| Edge (Functional connectivity) | Pheno127 | Net25_Pair7_17 | (Precuneus|Occipital)&(Temporal) | (Default_mode|Central_executive)&(Default_mode|Motor) |
| Edge (Functional connectivity) | Pheno128 | Net25_Pair8_17 | (Occipital)&(Temporal) | (Visual)&(Default_mode|Motor) |
| Edge (Functional connectivity) | Pheno129 | Net25_Pair9_17 | (Parietal|Temporal)&(Temporal) | (Default_mode|Central_executive)&(Default_mode|Motor) |
| Edge (Functional connectivity) | Pheno130 | Net25_Pair10_17 | (Postcentral|Precentral)&(Temporal) | (Motor)&(Default_mode|Motor) |
| Edge (Functional connectivity) | Pheno131 | Net25_Pair11_17 | (Postcentral|Precentral)&(Temporal) | (Motor)&(Default_mode|Motor) |
| Edge (Functional connectivity) | Pheno132 | Net25_Pair12_17 | (Paracentral|Postcentral)&(Temporal) | (Motor)&(Default_mode|Motor) |
| Edge (Functional connectivity) | Pheno133 | Net25_Pair13_17 | (Frontal|Supp_Motor_Area|Temporal)&(Temporal) | (Default_mode|Salience)&(Default_mode|Motor) |
| Edge (Functional connectivity) | Pheno134 | Net25_Pair14_17 | (Cingulate|Frontal)&(Temporal) | (Default_mode|Central_executive|Salience)&(Default_mode|Motor) |
| Edge (Functional connectivity) | Pheno135 | Net25_Pair15_17 | (Cerebellum)&(Temporal) | (Subcortical-cerebellum)&(Default_mode|Motor) |
| Edge (Functional connectivity) | Pheno136 | Net25_Pair16_17 | (Frontal)&(Temporal) | (Salience|Central_executive)&(Default_mode|Motor) |
| Edge (Functional connectivity) | Pheno137 | Net25_Pair1_18 | (Cerebellum|Precuneus)&(Subcortical) | (Default_mode)&(Subcortical-cerebellum) |
| Edge (Functional connectivity) | Pheno138 | Net25_Pair2_18 | (Occipital)&(Subcortical) | (Visual|Attention)&(Subcortical-cerebellum) |
| Edge (Functional connectivity) | Pheno139 | Net25_Pair3_18 | (Pariental)&(Subcortical) | (Attention|Salience|Central_executive)&(Subcortical-cerebellum) |
| Edge (Functional connectivity) | Pheno140 | Net25_Pair4_18 | (Calcarine|Lingual|Cuneus)&(Subcortical) | (Visual)&(Subcortical-cerebellum) |
| Edge (Functional connectivity) | Pheno141 | Net25_Pair5_18 | (Parietal|Cerebellum)&(Subcortical) | (Central_executive|Attention|Default_mode)&(Subcortical-cerebellum) |
| Edge (Functional connectivity) | Pheno142 | Net25_Pair6_18 | (Frontal)&(Subcortical) | (Default_mode|Central_executive)&(Subcortical-cerebellum) |
| Edge (Functional connectivity) | Pheno143 | Net25_Pair7_18 | (Precuneus|Occipital)&(Subcortical) | (Default_mode|Central_executive)&(Subcortical-cerebellum) |
| Edge (Functional connectivity) | Pheno144 | Net25_Pair8_18 | (Occipital)&(Subcortical) | (Visual)&(Subcortical-cerebellum) |
| Edge (Functional connectivity) | Pheno145 | Net25_Pair9_18 | (Parietal|Temporal)&(Subcortical) | (Default_mode|Central_executive)&(Subcortical-cerebellum) |
| Edge (Functional connectivity) | Pheno146 | Net25_Pair10_18 | (Postcentral|Precentral)&(Subcortical) | (Motor)&(Subcortical-cerebellum) |
| Edge (Functional connectivity) | Pheno147 | Net25_Pair11_18 | (Postcentral|Precentral)&(Subcortical) | (Motor)&(Subcortical-cerebellum) |
| Edge (Functional connectivity) | Pheno148 | Net25_Pair12_18 | (Paracentral|Postcentral)&(Subcortical) | (Motor)&(Subcortical-cerebellum) |
| Edge (Functional connectivity) | Pheno149 | Net25_Pair13_18 | (Frontal|Supp_Motor_Area|Temporal)&(Subcortical) | (Default_mode|Salience)&(Subcortical-cerebellum) |
| Edge (Functional connectivity) | Pheno150 | Net25_Pair14_18 | (Cingulate|Frontal)&(Subcortical) | (Default_mode|Central_executive|Salience)&(Subcortical-cerebellum) |
| Edge (Functional connectivity) | Pheno151 | Net25_Pair15_18 | (Cerebellum)&(Subcortical) | (Subcortical-cerebellum)&(Subcortical-cerebellum) |
| Edge (Functional connectivity) | Pheno152 | Net25_Pair16_18 | (Frontal)&(Subcortical) | (Salience|Central_executive)&(Subcortical-cerebellum) |
| Edge (Functional connectivity) | Pheno153 | Net25_Pair17_18 | (Temporal)&(Subcortical) | (Default_mode|Motor)&(Subcortical-cerebellum) |
| Edge (Functional connectivity) | Pheno154 | Net25_Pair1_19 | (Cerebellum|Precuneus)&(Occipital) | (Default_mode)&(Visual) |
| Edge (Functional connectivity) | Pheno155 | Net25_Pair2_19 | (Occipital)&(Occipital) | (Visual|Attention)&(Visual) |
| Edge (Functional connectivity) | Pheno156 | Net25_Pair3_19 | (Pariental)&(Occipital) | (Attention|Salience|Central_executive)&(Visual) |
| Edge (Functional connectivity) | Pheno157 | Net25_Pair4_19 | (Calcarine|Lingual|Cuneus)&(Occipital) | (Visual)&(Visual) |
| Edge (Functional connectivity) | Pheno158 | Net25_Pair5_19 | (Parietal|Cerebellum)&(Occipital) | (Central_executive|Attention|Default_mode)&(Visual) |
| Edge (Functional connectivity) | Pheno159 | Net25_Pair6_19 | (Frontal)&(Occipital) | (Default_mode|Central_executive)&(Visual) |
| Edge (Functional connectivity) | Pheno160 | Net25_Pair7_19 | (Precuneus|Occipital)&(Occipital) | (Default_mode|Central_executive)&(Visual) |
| Edge (Functional connectivity) | Pheno161 | Net25_Pair8_19 | (Occipital)&(Occipital) | (Visual)&(Visual) |
| Edge (Functional connectivity) | Pheno162 | Net25_Pair9_19 | (Parietal|Temporal)&(Occipital) | (Default_mode|Central_executive)&(Visual) |
| Edge (Functional connectivity) | Pheno163 | Net25_Pair10_19 | (Postcentral|Precentral)&(Occipital) | (Motor)&(Visual) |
| Edge (Functional connectivity) | Pheno164 | Net25_Pair11_19 | (Postcentral|Precentral)&(Occipital) | (Motor)&(Visual) |
| Edge (Functional connectivity) | Pheno165 | Net25_Pair12_19 | (Paracentral|Postcentral)&(Occipital) | (Motor)&(Visual) |
| Edge (Functional connectivity) | Pheno166 | Net25_Pair13_19 | (Frontal|Supp_Motor_Area|Temporal)&(Occipital) | (Default_mode|Salience)&(Visual) |
| Edge (Functional connectivity) | Pheno167 | Net25_Pair14_19 | (Cingulate|Frontal)&(Occipital) | (Default_mode|Central_executive|Salience)&(Visual) |
| Edge (Functional connectivity) | Pheno168 | Net25_Pair15_19 | (Cerebellum)&(Occipital) | (Subcortical-cerebellum)&(Visual) |
| Edge (Functional connectivity) | Pheno169 | Net25_Pair16_19 | (Frontal)&(Occipital) | (Salience|Central_executive)&(Visual) |
| Edge (Functional connectivity) | Pheno170 | Net25_Pair17_19 | (Temporal)&(Occipital) | (Default_mode|Motor)&(Visual) |
| Edge (Functional connectivity) | Pheno171 | Net25_Pair18_19 | (Subcortical)&(Occipital) | (Subcortical-cerebellum)&(Visual) |
| Edge (Functional connectivity) | Pheno172 | Net25_Pair1_20 | (Cerebellum|Precuneus)&(Precuneus|Cingulate) | (Default_mode)&(Default_mode|Central_executive) |
| Edge (Functional connectivity) | Pheno173 | Net25_Pair2_20 | (Occipital)&(Precuneus|Cingulate) | (Visual|Attention)&(Default_mode|Central_executive) |
| Edge (Functional connectivity) | Pheno174 | Net25_Pair3_20 | (Pariental)&(Precuneus|Cingulate) | (Attention|Salience|Central_executive)&(Default_mode|Central_executive) |
| Edge (Functional connectivity) | Pheno175 | Net25_Pair4_20 | (Calcarine|Lingual|Cuneus)&(Precuneus|Cingulate) | (Visual)&(Default_mode|Central_executive) |
| Edge (Functional connectivity) | Pheno176 | Net25_Pair5_20 | (Parietal|Cerebellum)&(Precuneus|Cingulate) | (Central_executive|Attention|Default_mode)&(Default_mode|Central_executive) |
| Edge (Functional connectivity) | Pheno177 | Net25_Pair6_20 | (Frontal)&(Precuneus|Cingulate) | (Default_mode|Central_executive)&(Default_mode|Central_executive) |
| Edge (Functional connectivity) | Pheno178 | Net25_Pair7_20 | (Precuneus|Occipital)&(Precuneus|Cingulate) | (Default_mode|Central_executive)&(Default_mode|Central_executive) |
| Edge (Functional connectivity) | Pheno179 | Net25_Pair8_20 | (Occipital)&(Precuneus|Cingulate) | (Visual)&(Default_mode|Central_executive) |
| Edge (Functional connectivity) | Pheno180 | Net25_Pair9_20 | (Parietal|Temporal)&(Precuneus|Cingulate) | (Default_mode|Central_executive)&(Default_mode|Central_executive) |
| Edge (Functional connectivity) | Pheno181 | Net25_Pair10_20 | (Postcentral|Precentral)&(Precuneus|Cingulate) | (Motor)&(Default_mode|Central_executive) |
| Edge (Functional connectivity) | Pheno182 | Net25_Pair11_20 | (Postcentral|Precentral)&(Precuneus|Cingulate) | (Motor)&(Default_mode|Central_executive) |
| Edge (Functional connectivity) | Pheno183 | Net25_Pair12_20 | (Paracentral|Postcentral)&(Precuneus|Cingulate) | (Motor)&(Default_mode|Central_executive) |
| Edge (Functional connectivity) | Pheno184 | Net25_Pair13_20 | (Frontal|Supp_Motor_Area|Temporal)&(Precuneus|Cingulate) | (Default_mode|Salience)&(Default_mode|Central_executive) |
| Edge (Functional connectivity) | Pheno185 | Net25_Pair14_20 | (Cingulate|Frontal)&(Precuneus|Cingulate) | (Default_mode|Central_executive|Salience)&(Default_mode|Central_executive) |
| Edge (Functional connectivity) | Pheno186 | Net25_Pair15_20 | (Cerebellum)&(Precuneus|Cingulate) | (Subcortical-cerebellum)&(Default_mode|Central_executive) |
| Edge (Functional connectivity) | Pheno187 | Net25_Pair16_20 | (Frontal)&(Precuneus|Cingulate) | (Salience|Central_executive)&(Default_mode|Central_executive) |
| Edge (Functional connectivity) | Pheno188 | Net25_Pair17_20 | (Temporal)&(Precuneus|Cingulate) | (Default_mode|Motor)&(Default_mode|Central_executive) |
| Edge (Functional connectivity) | Pheno189 | Net25_Pair18_20 | (Subcortical)&(Precuneus|Cingulate) | (Subcortical-cerebellum)&(Default_mode|Central_executive) |
| Edge (Functional connectivity) | Pheno190 | Net25_Pair19_20 | (Occipital)&(Precuneus|Cingulate) | (Visual)&(Default_mode|Central_executive) |
| Edge (Functional connectivity) | Pheno191 | Net25_Pair1_21 | (Cerebellum|Precuneus)&(Frontal) | (Default_mode)&(Default_mode|Central_executive) |
| Edge (Functional connectivity) | Pheno192 | Net25_Pair2_21 | (Occipital)&(Frontal) | (Visual|Attention)&(Default_mode|Central_executive) |
| Edge (Functional connectivity) | Pheno193 | Net25_Pair3_21 | (Pariental)&(Frontal) | (Attention|Salience|Central_executive)&(Default_mode|Central_executive) |
| Edge (Functional connectivity) | Pheno194 | Net25_Pair4_21 | (Calcarine|Lingual|Cuneus)&(Frontal) | (Visual)&(Default_mode|Central_executive) |
| Edge (Functional connectivity) | Pheno195 | Net25_Pair5_21 | (Parietal|Cerebellum)&(Frontal) | (Central_executive|Attention|Default_mode)&(Default_mode|Central_executive) |
| Edge (Functional connectivity) | Pheno196 | Net25_Pair6_21 | (Frontal)&(Frontal) | (Default_mode|Central_executive)&(Default_mode|Central_executive) |
| Edge (Functional connectivity) | Pheno197 | Net25_Pair7_21 | (Precuneus|Occipital)&(Frontal) | (Default_mode|Central_executive)&(Default_mode|Central_executive) |
| Edge (Functional connectivity) | Pheno198 | Net25_Pair8_21 | (Occipital)&(Frontal) | (Visual)&(Default_mode|Central_executive) |
| Edge (Functional connectivity) | Pheno199 | Net25_Pair9_21 | (Parietal|Temporal)&(Frontal) | (Default_mode|Central_executive)&(Default_mode|Central_executive) |
| Edge (Functional connectivity) | Pheno200 | Net25_Pair10_21 | (Postcentral|Precentral)&(Frontal) | (Motor)&(Default_mode|Central_executive) |
| Edge (Functional connectivity) | Pheno201 | Net25_Pair11_21 | (Postcentral|Precentral)&(Frontal) | (Motor)&(Default_mode|Central_executive) |
| Edge (Functional connectivity) | Pheno202 | Net25_Pair12_21 | (Paracentral|Postcentral)&(Frontal) | (Motor)&(Default_mode|Central_executive) |
| Edge (Functional connectivity) | Pheno203 | Net25_Pair13_21 | (Frontal|Supp_Motor_Area|Temporal)&(Frontal) | (Default_mode|Salience)&(Default_mode|Central_executive) |
| Edge (Functional connectivity) | Pheno204 | Net25_Pair14_21 | (Cingulate|Frontal)&(Frontal) | (Default_mode|Central_executive|Salience)&(Default_mode|Central_executive) |
| Edge (Functional connectivity) | Pheno205 | Net25_Pair15_21 | (Cerebellum)&(Frontal) | (Subcortical-cerebellum)&(Default_mode|Central_executive) |
| Edge (Functional connectivity) | Pheno206 | Net25_Pair16_21 | (Frontal)&(Frontal) | (Salience|Central_executive)&(Default_mode|Central_executive) |
| Edge (Functional connectivity) | Pheno207 | Net25_Pair17_21 | (Temporal)&(Frontal) | (Default_mode|Motor)&(Default_mode|Central_executive) |
| Edge (Functional connectivity) | Pheno208 | Net25_Pair18_21 | (Subcortical)&(Frontal) | (Subcortical-cerebellum)&(Default_mode|Central_executive) |
| Edge (Functional connectivity) | Pheno209 | Net25_Pair19_21 | (Occipital)&(Frontal) | (Visual)&(Default_mode|Central_executive) |
| Edge (Functional connectivity) | Pheno210 | Net25_Pair20_21 | (Precuneus|Cingulate)&(Frontal) | (Default_mode|Central_executive)&(Default_mode|Central_executive) |
| Edge (Functional connectivity) | Pheno211 | Net100_Pair1_2 | (Calcarine|Lingual|Cuneus)&(RolandicOper|SupraMarginal|Insula) | (Visual)&(Salience|Motor) |
| Edge (Functional connectivity) | Pheno212 | Net100_Pair1_3 | (Calcarine|Lingual|Cuneus)&(Lingual|Fusiform) | (Visual)&(Visual) |
| Edge (Functional connectivity) | Pheno213 | Net100_Pair2_3 | (RolandicOper|SupraMarginal|Insula)&(Lingual|Fusiform) | (Salience|Motor)&(Visual) |
| Edge (Functional connectivity) | Pheno214 | Net100_Pair1_4 | (Calcarine|Lingual|Cuneus)&(Occipital) | (Visual)&(Attention|Visual) |
| Edge (Functional connectivity) | Pheno215 | Net100_Pair2_4 | (RolandicOper|SupraMarginal|Insula)&(Occipital) | (Salience|Motor)&(Attention|Visual) |
| Edge (Functional connectivity) | Pheno216 | Net100_Pair3_4 | (Lingual|Fusiform)&(Occipital) | (Visual)&(Attention|Visual) |
| Edge (Functional connectivity) | Pheno217 | Net100_Pair1_5 | (Calcarine|Lingual|Cuneus)&(Precuneus|Angular|Cingulate) | (Visual)&(Default_mode|Central_executive) |
| Edge (Functional connectivity) | Pheno218 | Net100_Pair2_5 | (RolandicOper|SupraMarginal|Insula)&(Precuneus|Angular|Cingulate) | (Salience|Motor)&(Default_mode|Central_executive) |
| Edge (Functional connectivity) | Pheno219 | Net100_Pair3_5 | (Lingual|Fusiform)&(Precuneus|Angular|Cingulate) | (Visual)&(Default_mode|Central_executive) |
| Edge (Functional connectivity) | Pheno220 | Net100_Pair4_5 | (Occipital)&(Precuneus|Angular|Cingulate) | (Attention|Visual)&(Default_mode|Central_executive) |
| Edge (Functional connectivity) | Pheno221 | Net100_Pair1_6 | (Calcarine|Lingual|Cuneus)&(Postcentral|Precentral) | (Visual)&(Motor) |
| Edge (Functional connectivity) | Pheno222 | Net100_Pair2_6 | (RolandicOper|SupraMarginal|Insula)&(Postcentral|Precentral) | (Salience|Motor)&(Motor) |
| Edge (Functional connectivity) | Pheno223 | Net100_Pair3_6 | (Lingual|Fusiform)&(Postcentral|Precentral) | (Visual)&(Motor) |
| Edge (Functional connectivity) | Pheno224 | Net100_Pair4_6 | (Occipital)&(Postcentral|Precentral) | (Attention|Visual)&(Motor) |
| Edge (Functional connectivity) | Pheno225 | Net100_Pair5_6 | (Precuneus|Angular|Cingulate)&(Postcentral|Precentral) | (Default_mode|Central_executive)&(Motor) |
| Edge (Functional connectivity) | Pheno226 | Net100_Pair1_7 | (Calcarine|Lingual|Cuneus)&(Frontal|Cingulate) | (Visual)&(Default_mode|Limbic) |
| Edge (Functional connectivity) | Pheno227 | Net100_Pair2_7 | (RolandicOper|SupraMarginal|Insula)&(Frontal|Cingulate) | (Salience|Motor)&(Default_mode|Limbic) |
| Edge (Functional connectivity) | Pheno228 | Net100_Pair3_7 | (Lingual|Fusiform)&(Frontal|Cingulate) | (Visual)&(Default_mode|Limbic) |
| Edge (Functional connectivity) | Pheno229 | Net100_Pair4_7 | (Occipital)&(Frontal|Cingulate) | (Attention|Visual)&(Default_mode|Limbic) |
| Edge (Functional connectivity) | Pheno230 | Net100_Pair5_7 | (Precuneus|Angular|Cingulate)&(Frontal|Cingulate) | (Default_mode|Central_executive)&(Default_mode|Limbic) |
| Edge (Functional connectivity) | Pheno231 | Net100_Pair6_7 | (Postcentral|Precentral)&(Frontal|Cingulate) | (Motor)&(Default_mode|Limbic) |
| Edge (Functional connectivity) | Pheno232 | Net100_Pair1_8 | (Calcarine|Lingual|Cuneus)&(Calcarine|Lingual) | (Visual)&(Visual) |
| Edge (Functional connectivity) | Pheno233 | Net100_Pair2_8 | (RolandicOper|SupraMarginal|Insula)&(Calcarine|Lingual) | (Salience|Motor)&(Visual) |
| Edge (Functional connectivity) | Pheno234 | Net100_Pair3_8 | (Lingual|Fusiform)&(Calcarine|Lingual) | (Visual)&(Visual) |
| Edge (Functional connectivity) | Pheno235 | Net100_Pair4_8 | (Occipital)&(Calcarine|Lingual) | (Attention|Visual)&(Visual) |
| Edge (Functional connectivity) | Pheno236 | Net100_Pair5_8 | (Precuneus|Angular|Cingulate)&(Calcarine|Lingual) | (Default_mode|Central_executive)&(Visual) |
| Edge (Functional connectivity) | Pheno237 | Net100_Pair6_8 | (Postcentral|Precentral)&(Calcarine|Lingual) | (Motor)&(Visual) |
| Edge (Functional connectivity) | Pheno238 | Net100_Pair7_8 | (Frontal|Cingulate)&(Calcarine|Lingual) | (Default_mode|Limbic)&(Visual) |
| Edge (Functional connectivity) | Pheno239 | Net100_Pair1_9 | (Calcarine|Lingual|Cuneus)&(Temporal) | (Visual)&(Default_mode) |
| Edge (Functional connectivity) | Pheno240 | Net100_Pair2_9 | (RolandicOper|SupraMarginal|Insula)&(Temporal) | (Salience|Motor)&(Default_mode) |
| Edge (Functional connectivity) | Pheno241 | Net100_Pair3_9 | (Lingual|Fusiform)&(Temporal) | (Visual)&(Default_mode) |
| Edge (Functional connectivity) | Pheno242 | Net100_Pair4_9 | (Occipital)&(Temporal) | (Attention|Visual)&(Default_mode) |
| Edge (Functional connectivity) | Pheno243 | Net100_Pair5_9 | (Precuneus|Angular|Cingulate)&(Temporal) | (Default_mode|Central_executive)&(Default_mode) |
| Edge (Functional connectivity) | Pheno244 | Net100_Pair6_9 | (Postcentral|Precentral)&(Temporal) | (Motor)&(Default_mode) |
| Edge (Functional connectivity) | Pheno245 | Net100_Pair7_9 | (Frontal|Cingulate)&(Temporal) | (Default_mode|Limbic)&(Default_mode) |
| Edge (Functional connectivity) | Pheno246 | Net100_Pair8_9 | (Calcarine|Lingual)&(Temporal) | (Visual)&(Default_mode) |
| Edge (Functional connectivity) | Pheno247 | Net100_Pair1_10 | (Calcarine|Lingual|Cuneus)&(OccipitalPrecuneus) | (Visual)&(Default_mode|Central_executive) |
| Edge (Functional connectivity) | Pheno248 | Net100_Pair2_10 | (RolandicOper|SupraMarginal|Insula)&(OccipitalPrecuneus) | (Salience|Motor)&(Default_mode|Central_executive) |
| Edge (Functional connectivity) | Pheno249 | Net100_Pair3_10 | (Lingual|Fusiform)&(OccipitalPrecuneus) | (Visual)&(Default_mode|Central_executive) |
| Edge (Functional connectivity) | Pheno250 | Net100_Pair4_10 | (Occipital)&(OccipitalPrecuneus) | (Attention|Visual)&(Default_mode|Central_executive) |
| Edge (Functional connectivity) | Pheno251 | Net100_Pair5_10 | (Precuneus|Angular|Cingulate)&(OccipitalPrecuneus) | (Default_mode|Central_executive)&(Default_mode|Central_executive) |
| Edge (Functional connectivity) | Pheno252 | Net100_Pair6_10 | (Postcentral|Precentral)&(OccipitalPrecuneus) | (Motor)&(Default_mode|Central_executive) |
| Edge (Functional connectivity) | Pheno253 | Net100_Pair7_10 | (Frontal|Cingulate)&(OccipitalPrecuneus) | (Default_mode|Limbic)&(Default_mode|Central_executive) |
| Edge (Functional connectivity) | Pheno254 | Net100_Pair8_10 | (Calcarine|Lingual)&(OccipitalPrecuneus) | (Visual)&(Default_mode|Central_executive) |
| Edge (Functional connectivity) | Pheno255 | Net100_Pair9_10 | (Temporal)&(OccipitalPrecuneus) | (Default_mode)&(Default_mode|Central_executive) |
| Edge (Functional connectivity) | Pheno256 | Net100_Pair1_11 | (Calcarine|Lingual|Cuneus)&(Angular|Temporal) | (Visual)&(Default_mode|Central_executive) |
| Edge (Functional connectivity) | Pheno257 | Net100_Pair2_11 | (RolandicOper|SupraMarginal|Insula)&(Angular|Temporal) | (Salience|Motor)&(Default_mode|Central_executive) |
| Edge (Functional connectivity) | Pheno258 | Net100_Pair3_11 | (Lingual|Fusiform)&(Angular|Temporal) | (Visual)&(Default_mode|Central_executive) |
| Edge (Functional connectivity) | Pheno259 | Net100_Pair4_11 | (Occipital)&(Angular|Temporal) | (Attention|Visual)&(Default_mode|Central_executive) |
| Edge (Functional connectivity) | Pheno260 | Net100_Pair5_11 | (Precuneus|Angular|Cingulate)&(Angular|Temporal) | (Default_mode|Central_executive)&(Default_mode|Central_executive) |
| Edge (Functional connectivity) | Pheno261 | Net100_Pair6_11 | (Postcentral|Precentral)&(Angular|Temporal) | (Motor)&(Default_mode|Central_executive) |
| Edge (Functional connectivity) | Pheno262 | Net100_Pair7_11 | (Frontal|Cingulate)&(Angular|Temporal) | (Default_mode|Limbic)&(Default_mode|Central_executive) |
| Edge (Functional connectivity) | Pheno263 | Net100_Pair8_11 | (Calcarine|Lingual)&(Angular|Temporal) | (Visual)&(Default_mode|Central_executive) |
| Edge (Functional connectivity) | Pheno264 | Net100_Pair9_11 | (Temporal)&(Angular|Temporal) | (Default_mode)&(Default_mode|Central_executive) |
| Edge (Functional connectivity) | Pheno265 | Net100_Pair10_11 | (OccipitalPrecuneus)&(Angular|Temporal) | (Default_mode|Central_executive)&(Default_mode|Central_executive) |
| Edge (Functional connectivity) | Pheno266 | Net100_Pair1_12 | (Calcarine|Lingual|Cuneus)&(Frontal|Cerebellum) | (Visual)&(Central_executive|Default_mode) |
| Edge (Functional connectivity) | Pheno267 | Net100_Pair2_12 | (RolandicOper|SupraMarginal|Insula)&(Frontal|Cerebellum) | (Salience|Motor)&(Central_executive|Default_mode) |
| Edge (Functional connectivity) | Pheno268 | Net100_Pair3_12 | (Lingual|Fusiform)&(Frontal|Cerebellum) | (Visual)&(Central_executive|Default_mode) |
| Edge (Functional connectivity) | Pheno269 | Net100_Pair4_12 | (Occipital)&(Frontal|Cerebellum) | (Attention|Visual)&(Central_executive|Default_mode) |
| Edge (Functional connectivity) | Pheno270 | Net100_Pair5_12 | (Precuneus|Angular|Cingulate)&(Frontal|Cerebellum) | (Default_mode|Central_executive)&(Central_executive|Default_mode) |
| Edge (Functional connectivity) | Pheno271 | Net100_Pair6_12 | (Postcentral|Precentral)&(Frontal|Cerebellum) | (Motor)&(Central_executive|Default_mode) |
| Edge (Functional connectivity) | Pheno272 | Net100_Pair7_12 | (Frontal|Cingulate)&(Frontal|Cerebellum) | (Default_mode|Limbic)&(Central_executive|Default_mode) |
| Edge (Functional connectivity) | Pheno273 | Net100_Pair8_12 | (Calcarine|Lingual)&(Frontal|Cerebellum) | (Visual)&(Central_executive|Default_mode) |
| Edge (Functional connectivity) | Pheno274 | Net100_Pair9_12 | (Temporal)&(Frontal|Cerebellum) | (Default_mode)&(Central_executive|Default_mode) |
| Edge (Functional connectivity) | Pheno275 | Net100_Pair10_12 | (OccipitalPrecuneus)&(Frontal|Cerebellum) | (Default_mode|Central_executive)&(Central_executive|Default_mode) |
| Edge (Functional connectivity) | Pheno276 | Net100_Pair11_12 | (Angular|Temporal)&(Frontal|Cerebellum) | (Default_mode|Central_executive)&(Central_executive|Default_mode) |
| Edge (Functional connectivity) | Pheno277 | Net100_Pair1_13 | (Calcarine|Lingual|Cuneus)&(Frontal_Sup) | (Visual)&(Default_mode) |
| Edge (Functional connectivity) | Pheno278 | Net100_Pair2_13 | (RolandicOper|SupraMarginal|Insula)&(Frontal_Sup) | (Salience|Motor)&(Default_mode) |
| Edge (Functional connectivity) | Pheno279 | Net100_Pair3_13 | (Lingual|Fusiform)&(Frontal_Sup) | (Visual)&(Default_mode) |
| Edge (Functional connectivity) | Pheno280 | Net100_Pair4_13 | (Occipital)&(Frontal_Sup) | (Attention|Visual)&(Default_mode) |
| Edge (Functional connectivity) | Pheno281 | Net100_Pair5_13 | (Precuneus|Angular|Cingulate)&(Frontal_Sup) | (Default_mode|Central_executive)&(Default_mode) |
| Edge (Functional connectivity) | Pheno282 | Net100_Pair6_13 | (Postcentral|Precentral)&(Frontal_Sup) | (Motor)&(Default_mode) |
| Edge (Functional connectivity) | Pheno283 | Net100_Pair7_13 | (Frontal|Cingulate)&(Frontal_Sup) | (Default_mode|Limbic)&(Default_mode) |
| Edge (Functional connectivity) | Pheno284 | Net100_Pair8_13 | (Calcarine|Lingual)&(Frontal_Sup) | (Visual)&(Default_mode) |
| Edge (Functional connectivity) | Pheno285 | Net100_Pair9_13 | (Temporal)&(Frontal_Sup) | (Default_mode)&(Default_mode) |
| Edge (Functional connectivity) | Pheno286 | Net100_Pair10_13 | (OccipitalPrecuneus)&(Frontal_Sup) | (Default_mode|Central_executive)&(Default_mode) |
| Edge (Functional connectivity) | Pheno287 | Net100_Pair11_13 | (Angular|Temporal)&(Frontal_Sup) | (Default_mode|Central_executive)&(Default_mode) |
| Edge (Functional connectivity) | Pheno288 | Net100_Pair12_13 | (Frontal|Cerebellum)&(Frontal_Sup) | (Central_executive|Default_mode)&(Default_mode) |
| Edge (Functional connectivity) | Pheno289 | Net100_Pair1_14 | (Calcarine|Lingual|Cuneus)&(Cuneus|Occipital) | (Visual)&(Visual) |
| Edge (Functional connectivity) | Pheno290 | Net100_Pair2_14 | (RolandicOper|SupraMarginal|Insula)&(Cuneus|Occipital) | (Salience|Motor)&(Visual) |
| Edge (Functional connectivity) | Pheno291 | Net100_Pair3_14 | (Lingual|Fusiform)&(Cuneus|Occipital) | (Visual)&(Visual) |
| Edge (Functional connectivity) | Pheno292 | Net100_Pair4_14 | (Occipital)&(Cuneus|Occipital) | (Attention|Visual)&(Visual) |
| Edge (Functional connectivity) | Pheno293 | Net100_Pair5_14 | (Precuneus|Angular|Cingulate)&(Cuneus|Occipital) | (Default_mode|Central_executive)&(Visual) |
| Edge (Functional connectivity) | Pheno294 | Net100_Pair6_14 | (Postcentral|Precentral)&(Cuneus|Occipital) | (Motor)&(Visual) |
| Edge (Functional connectivity) | Pheno295 | Net100_Pair7_14 | (Frontal|Cingulate)&(Cuneus|Occipital) | (Default_mode|Limbic)&(Visual) |
| Edge (Functional connectivity) | Pheno296 | Net100_Pair8_14 | (Calcarine|Lingual)&(Cuneus|Occipital) | (Visual)&(Visual) |
| Edge (Functional connectivity) | Pheno297 | Net100_Pair9_14 | (Temporal)&(Cuneus|Occipital) | (Default_mode)&(Visual) |
| Edge (Functional connectivity) | Pheno298 | Net100_Pair10_14 | (OccipitalPrecuneus)&(Cuneus|Occipital) | (Default_mode|Central_executive)&(Visual) |
| Edge (Functional connectivity) | Pheno299 | Net100_Pair11_14 | (Angular|Temporal)&(Cuneus|Occipital) | (Default_mode|Central_executive)&(Visual) |
| Edge (Functional connectivity) | Pheno300 | Net100_Pair12_14 | (Frontal|Cerebellum)&(Cuneus|Occipital) | (Central_executive|Default_mode)&(Visual) |
| Edge (Functional connectivity) | Pheno301 | Net100_Pair13_14 | (Frontal_Sup)&(Cuneus|Occipital) | (Default_mode)&(Visual) |
| Edge (Functional connectivity) | Pheno302 | Net100_Pair1_15 | (Calcarine|Lingual|Cuneus)&(Insula|Cingulate) | (Visual)&(Salience|Default_mode) |
| Edge (Functional connectivity) | Pheno303 | Net100_Pair2_15 | (RolandicOper|SupraMarginal|Insula)&(Insula|Cingulate) | (Salience|Motor)&(Salience|Default_mode) |
| Edge (Functional connectivity) | Pheno304 | Net100_Pair3_15 | (Lingual|Fusiform)&(Insula|Cingulate) | (Visual)&(Salience|Default_mode) |
| Edge (Functional connectivity) | Pheno305 | Net100_Pair4_15 | (Occipital)&(Insula|Cingulate) | (Attention|Visual)&(Salience|Default_mode) |
| Edge (Functional connectivity) | Pheno306 | Net100_Pair5_15 | (Precuneus|Angular|Cingulate)&(Insula|Cingulate) | (Default_mode|Central_executive)&(Salience|Default_mode) |
| Edge (Functional connectivity) | Pheno307 | Net100_Pair6_15 | (Postcentral|Precentral)&(Insula|Cingulate) | (Motor)&(Salience|Default_mode) |
| Edge (Functional connectivity) | Pheno308 | Net100_Pair7_15 | (Frontal|Cingulate)&(Insula|Cingulate) | (Default_mode|Limbic)&(Salience|Default_mode) |
| Edge (Functional connectivity) | Pheno309 | Net100_Pair8_15 | (Calcarine|Lingual)&(Insula|Cingulate) | (Visual)&(Salience|Default_mode) |
| Edge (Functional connectivity) | Pheno310 | Net100_Pair9_15 | (Temporal)&(Insula|Cingulate) | (Default_mode)&(Salience|Default_mode) |
| Edge (Functional connectivity) | Pheno311 | Net100_Pair10_15 | (OccipitalPrecuneus)&(Insula|Cingulate) | (Default_mode|Central_executive)&(Salience|Default_mode) |
| Edge (Functional connectivity) | Pheno312 | Net100_Pair11_15 | (Angular|Temporal)&(Insula|Cingulate) | (Default_mode|Central_executive)&(Salience|Default_mode) |
| Edge (Functional connectivity) | Pheno313 | Net100_Pair12_15 | (Frontal|Cerebellum)&(Insula|Cingulate) | (Central_executive|Default_mode)&(Salience|Default_mode) |
| Edge (Functional connectivity) | Pheno314 | Net100_Pair13_15 | (Frontal_Sup)&(Insula|Cingulate) | (Default_mode)&(Salience|Default_mode) |
| Edge (Functional connectivity) | Pheno315 | Net100_Pair14_15 | (Cuneus|Occipital)&(Insula|Cingulate) | (Visual)&(Salience|Default_mode) |
| Edge (Functional connectivity) | Pheno316 | Net100_Pair1_16 | (Calcarine|Lingual|Cuneus)&(Occipital) | (Visual)&(Visual) |
| Edge (Functional connectivity) | Pheno317 | Net100_Pair2_16 | (RolandicOper|SupraMarginal|Insula)&(Occipital) | (Salience|Motor)&(Visual) |
| Edge (Functional connectivity) | Pheno318 | Net100_Pair3_16 | (Lingual|Fusiform)&(Occipital) | (Visual)&(Visual) |
| Edge (Functional connectivity) | Pheno319 | Net100_Pair4_16 | (Occipital)&(Occipital) | (Attention|Visual)&(Visual) |
| Edge (Functional connectivity) | Pheno320 | Net100_Pair5_16 | (Precuneus|Angular|Cingulate)&(Occipital) | (Default_mode|Central_executive)&(Visual) |
| Edge (Functional connectivity) | Pheno321 | Net100_Pair6_16 | (Postcentral|Precentral)&(Occipital) | (Motor)&(Visual) |
| Edge (Functional connectivity) | Pheno322 | Net100_Pair7_16 | (Frontal|Cingulate)&(Occipital) | (Default_mode|Limbic)&(Visual) |
| Edge (Functional connectivity) | Pheno323 | Net100_Pair8_16 | (Calcarine|Lingual)&(Occipital) | (Visual)&(Visual) |
| Edge (Functional connectivity) | Pheno324 | Net100_Pair9_16 | (Temporal)&(Occipital) | (Default_mode)&(Visual) |
| Edge (Functional connectivity) | Pheno325 | Net100_Pair10_16 | (OccipitalPrecuneus)&(Occipital) | (Default_mode|Central_executive)&(Visual) |
| Edge (Functional connectivity) | Pheno326 | Net100_Pair11_16 | (Angular|Temporal)&(Occipital) | (Default_mode|Central_executive)&(Visual) |
| Edge (Functional connectivity) | Pheno327 | Net100_Pair12_16 | (Frontal|Cerebellum)&(Occipital) | (Central_executive|Default_mode)&(Visual) |
| Edge (Functional connectivity) | Pheno328 | Net100_Pair13_16 | (Frontal_Sup)&(Occipital) | (Default_mode)&(Visual) |
| Edge (Functional connectivity) | Pheno329 | Net100_Pair14_16 | (Cuneus|Occipital)&(Occipital) | (Visual)&(Visual) |
| Edge (Functional connectivity) | Pheno330 | Net100_Pair15_16 | (Insula|Cingulate)&(Occipital) | (Salience|Default_mode)&(Visual) |
| Edge (Functional connectivity) | Pheno331 | Net100_Pair1_17 | (Calcarine|Lingual|Cuneus)&(Cerebellum) | (Visual)&(Subcortical-cerebellum) |
| Edge (Functional connectivity) | Pheno332 | Net100_Pair2_17 | (RolandicOper|SupraMarginal|Insula)&(Cerebellum) | (Salience|Motor)&(Subcortical-cerebellum) |
| Edge (Functional connectivity) | Pheno333 | Net100_Pair3_17 | (Lingual|Fusiform)&(Cerebellum) | (Visual)&(Subcortical-cerebellum) |
| Edge (Functional connectivity) | Pheno334 | Net100_Pair4_17 | (Occipital)&(Cerebellum) | (Attention|Visual)&(Subcortical-cerebellum) |
| Edge (Functional connectivity) | Pheno335 | Net100_Pair5_17 | (Precuneus|Angular|Cingulate)&(Cerebellum) | (Default_mode|Central_executive)&(Subcortical-cerebellum) |
| Edge (Functional connectivity) | Pheno336 | Net100_Pair6_17 | (Postcentral|Precentral)&(Cerebellum) | (Motor)&(Subcortical-cerebellum) |
| Edge (Functional connectivity) | Pheno337 | Net100_Pair7_17 | (Frontal|Cingulate)&(Cerebellum) | (Default_mode|Limbic)&(Subcortical-cerebellum) |
| Edge (Functional connectivity) | Pheno338 | Net100_Pair8_17 | (Calcarine|Lingual)&(Cerebellum) | (Visual)&(Subcortical-cerebellum) |
| Edge (Functional connectivity) | Pheno339 | Net100_Pair9_17 | (Temporal)&(Cerebellum) | (Default_mode)&(Subcortical-cerebellum) |
| Edge (Functional connectivity) | Pheno340 | Net100_Pair10_17 | (OccipitalPrecuneus)&(Cerebellum) | (Default_mode|Central_executive)&(Subcortical-cerebellum) |
| Edge (Functional connectivity) | Pheno341 | Net100_Pair11_17 | (Angular|Temporal)&(Cerebellum) | (Default_mode|Central_executive)&(Subcortical-cerebellum) |
| Edge (Functional connectivity) | Pheno342 | Net100_Pair12_17 | (Frontal|Cerebellum)&(Cerebellum) | (Central_executive|Default_mode)&(Subcortical-cerebellum) |
| Edge (Functional connectivity) | Pheno343 | Net100_Pair13_17 | (Frontal_Sup)&(Cerebellum) | (Default_mode)&(Subcortical-cerebellum) |
| Edge (Functional connectivity) | Pheno344 | Net100_Pair14_17 | (Cuneus|Occipital)&(Cerebellum) | (Visual)&(Subcortical-cerebellum) |
| Edge (Functional connectivity) | Pheno345 | Net100_Pair15_17 | (Insula|Cingulate)&(Cerebellum) | (Salience|Default_mode)&(Subcortical-cerebellum) |
| Edge (Functional connectivity) | Pheno346 | Net100_Pair16_17 | (Occipital)&(Cerebellum) | (Visual)&(Subcortical-cerebellum) |
| Edge (Functional connectivity) | Pheno347 | Net100_Pair1_18 | (Calcarine|Lingual|Cuneus)&(Parietal) | (Visual)&(Attention|Central_executive|Salience) |
| Edge (Functional connectivity) | Pheno348 | Net100_Pair2_18 | (RolandicOper|SupraMarginal|Insula)&(Parietal) | (Salience|Motor)&(Attention|Central_executive|Salience) |
| Edge (Functional connectivity) | Pheno349 | Net100_Pair3_18 | (Lingual|Fusiform)&(Parietal) | (Visual)&(Attention|Central_executive|Salience) |
| Edge (Functional connectivity) | Pheno350 | Net100_Pair4_18 | (Occipital)&(Parietal) | (Attention|Visual)&(Attention|Central_executive|Salience) |
| Edge (Functional connectivity) | Pheno351 | Net100_Pair5_18 | (Precuneus|Angular|Cingulate)&(Parietal) | (Default_mode|Central_executive)&(Attention|Central_executive|Salience) |
| Edge (Functional connectivity) | Pheno352 | Net100_Pair6_18 | (Postcentral|Precentral)&(Parietal) | (Motor)&(Attention|Central_executive|Salience) |
| Edge (Functional connectivity) | Pheno353 | Net100_Pair7_18 | (Frontal|Cingulate)&(Parietal) | (Default_mode|Limbic)&(Attention|Central_executive|Salience) |
| Edge (Functional connectivity) | Pheno354 | Net100_Pair8_18 | (Calcarine|Lingual)&(Parietal) | (Visual)&(Attention|Central_executive|Salience) |
| Edge (Functional connectivity) | Pheno355 | Net100_Pair9_18 | (Temporal)&(Parietal) | (Default_mode)&(Attention|Central_executive|Salience) |
| Edge (Functional connectivity) | Pheno356 | Net100_Pair10_18 | (OccipitalPrecuneus)&(Parietal) | (Default_mode|Central_executive)&(Attention|Central_executive|Salience) |
| Edge (Functional connectivity) | Pheno357 | Net100_Pair11_18 | (Angular|Temporal)&(Parietal) | (Default_mode|Central_executive)&(Attention|Central_executive|Salience) |
| Edge (Functional connectivity) | Pheno358 | Net100_Pair12_18 | (Frontal|Cerebellum)&(Parietal) | (Central_executive|Default_mode)&(Attention|Central_executive|Salience) |
| Edge (Functional connectivity) | Pheno359 | Net100_Pair13_18 | (Frontal_Sup)&(Parietal) | (Default_mode)&(Attention|Central_executive|Salience) |
| Edge (Functional connectivity) | Pheno360 | Net100_Pair14_18 | (Cuneus|Occipital)&(Parietal) | (Visual)&(Attention|Central_executive|Salience) |
| Edge (Functional connectivity) | Pheno361 | Net100_Pair15_18 | (Insula|Cingulate)&(Parietal) | (Salience|Default_mode)&(Attention|Central_executive|Salience) |
| Edge (Functional connectivity) | Pheno362 | Net100_Pair16_18 | (Occipital)&(Parietal) | (Visual)&(Attention|Central_executive|Salience) |
| Edge (Functional connectivity) | Pheno363 | Net100_Pair17_18 | (Cerebellum)&(Parietal) | (Subcortical-cerebellum)&(Attention|Central_executive|Salience) |
| Edge (Functional connectivity) | Pheno364 | Net100_Pair1_19 | (Calcarine|Lingual|Cuneus)&(Precuneus|Cuneus|Cingulate) | (Visual)&(Default_mode|Central_executive) |
| Edge (Functional connectivity) | Pheno365 | Net100_Pair2_19 | (RolandicOper|SupraMarginal|Insula)&(Precuneus|Cuneus|Cingulate) | (Salience|Motor)&(Default_mode|Central_executive) |
| Edge (Functional connectivity) | Pheno366 | Net100_Pair3_19 | (Lingual|Fusiform)&(Precuneus|Cuneus|Cingulate) | (Visual)&(Default_mode|Central_executive) |
| Edge (Functional connectivity) | Pheno367 | Net100_Pair4_19 | (Occipital)&(Precuneus|Cuneus|Cingulate) | (Attention|Visual)&(Default_mode|Central_executive) |
| Edge (Functional connectivity) | Pheno368 | Net100_Pair5_19 | (Precuneus|Angular|Cingulate)&(Precuneus|Cuneus|Cingulate) | (Default_mode|Central_executive)&(Default_mode|Central_executive) |
| Edge (Functional connectivity) | Pheno369 | Net100_Pair6_19 | (Postcentral|Precentral)&(Precuneus|Cuneus|Cingulate) | (Motor)&(Default_mode|Central_executive) |
| Edge (Functional connectivity) | Pheno370 | Net100_Pair7_19 | (Frontal|Cingulate)&(Precuneus|Cuneus|Cingulate) | (Default_mode|Limbic)&(Default_mode|Central_executive) |
| Edge (Functional connectivity) | Pheno371 | Net100_Pair8_19 | (Calcarine|Lingual)&(Precuneus|Cuneus|Cingulate) | (Visual)&(Default_mode|Central_executive) |
| Edge (Functional connectivity) | Pheno372 | Net100_Pair9_19 | (Temporal)&(Precuneus|Cuneus|Cingulate) | (Default_mode)&(Default_mode|Central_executive) |
| Edge (Functional connectivity) | Pheno373 | Net100_Pair10_19 | (OccipitalPrecuneus)&(Precuneus|Cuneus|Cingulate) | (Default_mode|Central_executive)&(Default_mode|Central_executive) |
| Edge (Functional connectivity) | Pheno374 | Net100_Pair11_19 | (Angular|Temporal)&(Precuneus|Cuneus|Cingulate) | (Default_mode|Central_executive)&(Default_mode|Central_executive) |
| Edge (Functional connectivity) | Pheno375 | Net100_Pair12_19 | (Frontal|Cerebellum)&(Precuneus|Cuneus|Cingulate) | (Central_executive|Default_mode)&(Default_mode|Central_executive) |
| Edge (Functional connectivity) | Pheno376 | Net100_Pair13_19 | (Frontal_Sup)&(Precuneus|Cuneus|Cingulate) | (Default_mode)&(Default_mode|Central_executive) |
| Edge (Functional connectivity) | Pheno377 | Net100_Pair14_19 | (Cuneus|Occipital)&(Precuneus|Cuneus|Cingulate) | (Visual)&(Default_mode|Central_executive) |
| Edge (Functional connectivity) | Pheno378 | Net100_Pair15_19 | (Insula|Cingulate)&(Precuneus|Cuneus|Cingulate) | (Salience|Default_mode)&(Default_mode|Central_executive) |
| Edge (Functional connectivity) | Pheno379 | Net100_Pair16_19 | (Occipital)&(Precuneus|Cuneus|Cingulate) | (Visual)&(Default_mode|Central_executive) |
| Edge (Functional connectivity) | Pheno380 | Net100_Pair17_19 | (Cerebellum)&(Precuneus|Cuneus|Cingulate) | (Subcortical-cerebellum)&(Default_mode|Central_executive) |
| Edge (Functional connectivity) | Pheno381 | Net100_Pair18_19 | (Parietal)&(Precuneus|Cuneus|Cingulate) | (Attention|Central_executive|Salience)&(Default_mode|Central_executive) |
| Edge (Functional connectivity) | Pheno382 | Net100_Pair1_20 | (Calcarine|Lingual|Cuneus)&(Postcentral|Precentral) | (Visual)&(Motor|Attention) |
| Edge (Functional connectivity) | Pheno383 | Net100_Pair2_20 | (RolandicOper|SupraMarginal|Insula)&(Postcentral|Precentral) | (Salience|Motor)&(Motor|Attention) |
| Edge (Functional connectivity) | Pheno384 | Net100_Pair3_20 | (Lingual|Fusiform)&(Postcentral|Precentral) | (Visual)&(Motor|Attention) |
| Edge (Functional connectivity) | Pheno385 | Net100_Pair4_20 | (Occipital)&(Postcentral|Precentral) | (Attention|Visual)&(Motor|Attention) |
| Edge (Functional connectivity) | Pheno386 | Net100_Pair5_20 | (Precuneus|Angular|Cingulate)&(Postcentral|Precentral) | (Default_mode|Central_executive)&(Motor|Attention) |
| Edge (Functional connectivity) | Pheno387 | Net100_Pair6_20 | (Postcentral|Precentral)&(Postcentral|Precentral) | (Motor)&(Motor|Attention) |
| Edge (Functional connectivity) | Pheno388 | Net100_Pair7_20 | (Frontal|Cingulate)&(Postcentral|Precentral) | (Default_mode|Limbic)&(Motor|Attention) |
| Edge (Functional connectivity) | Pheno389 | Net100_Pair8_20 | (Calcarine|Lingual)&(Postcentral|Precentral) | (Visual)&(Motor|Attention) |
| Edge (Functional connectivity) | Pheno390 | Net100_Pair9_20 | (Temporal)&(Postcentral|Precentral) | (Default_mode)&(Motor|Attention) |
| Edge (Functional connectivity) | Pheno391 | Net100_Pair10_20 | (OccipitalPrecuneus)&(Postcentral|Precentral) | (Default_mode|Central_executive)&(Motor|Attention) |
| Edge (Functional connectivity) | Pheno392 | Net100_Pair11_20 | (Angular|Temporal)&(Postcentral|Precentral) | (Default_mode|Central_executive)&(Motor|Attention) |
| Edge (Functional connectivity) | Pheno393 | Net100_Pair12_20 | (Frontal|Cerebellum)&(Postcentral|Precentral) | (Central_executive|Default_mode)&(Motor|Attention) |
| Edge (Functional connectivity) | Pheno394 | Net100_Pair13_20 | (Frontal_Sup)&(Postcentral|Precentral) | (Default_mode)&(Motor|Attention) |
| Edge (Functional connectivity) | Pheno395 | Net100_Pair14_20 | (Cuneus|Occipital)&(Postcentral|Precentral) | (Visual)&(Motor|Attention) |
| Edge (Functional connectivity) | Pheno396 | Net100_Pair15_20 | (Insula|Cingulate)&(Postcentral|Precentral) | (Salience|Default_mode)&(Motor|Attention) |
| Edge (Functional connectivity) | Pheno397 | Net100_Pair16_20 | (Occipital)&(Postcentral|Precentral) | (Visual)&(Motor|Attention) |
| Edge (Functional connectivity) | Pheno398 | Net100_Pair17_20 | (Cerebellum)&(Postcentral|Precentral) | (Subcortical-cerebellum)&(Motor|Attention) |
| Edge (Functional connectivity) | Pheno399 | Net100_Pair18_20 | (Parietal)&(Postcentral|Precentral) | (Attention|Central_executive|Salience)&(Motor|Attention) |
| Edge (Functional connectivity) | Pheno400 | Net100_Pair19_20 | (Precuneus|Cuneus|Cingulate)&(Postcentral|Precentral) | (Default_mode|Central_executive)&(Motor|Attention) |
| Edge (Functional connectivity) | Pheno401 | Net100_Pair1_21 | (Calcarine|Lingual|Cuneus)&(Frontal_Sup) | (Visual)&(Default_mode|Central_executive) |
| Edge (Functional connectivity) | Pheno402 | Net100_Pair2_21 | (RolandicOper|SupraMarginal|Insula)&(Frontal_Sup) | (Salience|Motor)&(Default_mode|Central_executive) |
| Edge (Functional connectivity) | Pheno403 | Net100_Pair3_21 | (Lingual|Fusiform)&(Frontal_Sup) | (Visual)&(Default_mode|Central_executive) |
| Edge (Functional connectivity) | Pheno404 | Net100_Pair4_21 | (Occipital)&(Frontal_Sup) | (Attention|Visual)&(Default_mode|Central_executive) |
| Edge (Functional connectivity) | Pheno405 | Net100_Pair5_21 | (Precuneus|Angular|Cingulate)&(Frontal_Sup) | (Default_mode|Central_executive)&(Default_mode|Central_executive) |
| Edge (Functional connectivity) | Pheno406 | Net100_Pair6_21 | (Postcentral|Precentral)&(Frontal_Sup) | (Motor)&(Default_mode|Central_executive) |
| Edge (Functional connectivity) | Pheno407 | Net100_Pair7_21 | (Frontal|Cingulate)&(Frontal_Sup) | (Default_mode|Limbic)&(Default_mode|Central_executive) |
| Edge (Functional connectivity) | Pheno408 | Net100_Pair8_21 | (Calcarine|Lingual)&(Frontal_Sup) | (Visual)&(Default_mode|Central_executive) |
| Edge (Functional connectivity) | Pheno409 | Net100_Pair9_21 | (Temporal)&(Frontal_Sup) | (Default_mode)&(Default_mode|Central_executive) |
| Edge (Functional connectivity) | Pheno410 | Net100_Pair10_21 | (OccipitalPrecuneus)&(Frontal_Sup) | (Default_mode|Central_executive)&(Default_mode|Central_executive) |
| Edge (Functional connectivity) | Pheno411 | Net100_Pair11_21 | (Angular|Temporal)&(Frontal_Sup) | (Default_mode|Central_executive)&(Default_mode|Central_executive) |
| Edge (Functional connectivity) | Pheno412 | Net100_Pair12_21 | (Frontal|Cerebellum)&(Frontal_Sup) | (Central_executive|Default_mode)&(Default_mode|Central_executive) |
| Edge (Functional connectivity) | Pheno413 | Net100_Pair13_21 | (Frontal_Sup)&(Frontal_Sup) | (Default_mode)&(Default_mode|Central_executive) |
| Edge (Functional connectivity) | Pheno414 | Net100_Pair14_21 | (Cuneus|Occipital)&(Frontal_Sup) | (Visual)&(Default_mode|Central_executive) |
| Edge (Functional connectivity) | Pheno415 | Net100_Pair15_21 | (Insula|Cingulate)&(Frontal_Sup) | (Salience|Default_mode)&(Default_mode|Central_executive) |
| Edge (Functional connectivity) | Pheno416 | Net100_Pair16_21 | (Occipital)&(Frontal_Sup) | (Visual)&(Default_mode|Central_executive) |
| Edge (Functional connectivity) | Pheno417 | Net100_Pair17_21 | (Cerebellum)&(Frontal_Sup) | (Subcortical-cerebellum)&(Default_mode|Central_executive) |
| Edge (Functional connectivity) | Pheno418 | Net100_Pair18_21 | (Parietal)&(Frontal_Sup) | (Attention|Central_executive|Salience)&(Default_mode|Central_executive) |
| Edge (Functional connectivity) | Pheno419 | Net100_Pair19_21 | (Precuneus|Cuneus|Cingulate)&(Frontal_Sup) | (Default_mode|Central_executive)&(Default_mode|Central_executive) |
| Edge (Functional connectivity) | Pheno420 | Net100_Pair20_21 | (Postcentral|Precentral)&(Frontal_Sup) | (Motor|Attention)&(Default_mode|Central_executive) |
| Edge (Functional connectivity) | Pheno421 | Net100_Pair1_22 | (Calcarine|Lingual|Cuneus)&(Temporal_Sup) | (Visual)&(Default_mode|Motor) |
| Edge (Functional connectivity) | Pheno422 | Net100_Pair2_22 | (RolandicOper|SupraMarginal|Insula)&(Temporal_Sup) | (Salience|Motor)&(Default_mode|Motor) |
| Edge (Functional connectivity) | Pheno423 | Net100_Pair3_22 | (Lingual|Fusiform)&(Temporal_Sup) | (Visual)&(Default_mode|Motor) |
| Edge (Functional connectivity) | Pheno424 | Net100_Pair4_22 | (Occipital)&(Temporal_Sup) | (Attention|Visual)&(Default_mode|Motor) |
| Edge (Functional connectivity) | Pheno425 | Net100_Pair5_22 | (Precuneus|Angular|Cingulate)&(Temporal_Sup) | (Default_mode|Central_executive)&(Default_mode|Motor) |
| Edge (Functional connectivity) | Pheno426 | Net100_Pair6_22 | (Postcentral|Precentral)&(Temporal_Sup) | (Motor)&(Default_mode|Motor) |
| Edge (Functional connectivity) | Pheno427 | Net100_Pair7_22 | (Frontal|Cingulate)&(Temporal_Sup) | (Default_mode|Limbic)&(Default_mode|Motor) |
| Edge (Functional connectivity) | Pheno428 | Net100_Pair8_22 | (Calcarine|Lingual)&(Temporal_Sup) | (Visual)&(Default_mode|Motor) |
| Edge (Functional connectivity) | Pheno429 | Net100_Pair9_22 | (Temporal)&(Temporal_Sup) | (Default_mode)&(Default_mode|Motor) |
| Edge (Functional connectivity) | Pheno430 | Net100_Pair10_22 | (OccipitalPrecuneus)&(Temporal_Sup) | (Default_mode|Central_executive)&(Default_mode|Motor) |
| Edge (Functional connectivity) | Pheno431 | Net100_Pair11_22 | (Angular|Temporal)&(Temporal_Sup) | (Default_mode|Central_executive)&(Default_mode|Motor) |
| Edge (Functional connectivity) | Pheno432 | Net100_Pair12_22 | (Frontal|Cerebellum)&(Temporal_Sup) | (Central_executive|Default_mode)&(Default_mode|Motor) |
| Edge (Functional connectivity) | Pheno433 | Net100_Pair13_22 | (Frontal_Sup)&(Temporal_Sup) | (Default_mode)&(Default_mode|Motor) |
| Edge (Functional connectivity) | Pheno434 | Net100_Pair14_22 | (Cuneus|Occipital)&(Temporal_Sup) | (Visual)&(Default_mode|Motor) |
| Edge (Functional connectivity) | Pheno435 | Net100_Pair15_22 | (Insula|Cingulate)&(Temporal_Sup) | (Salience|Default_mode)&(Default_mode|Motor) |
| Edge (Functional connectivity) | Pheno436 | Net100_Pair16_22 | (Occipital)&(Temporal_Sup) | (Visual)&(Default_mode|Motor) |
| Edge (Functional connectivity) | Pheno437 | Net100_Pair17_22 | (Cerebellum)&(Temporal_Sup) | (Subcortical-cerebellum)&(Default_mode|Motor) |
| Edge (Functional connectivity) | Pheno438 | Net100_Pair18_22 | (Parietal)&(Temporal_Sup) | (Attention|Central_executive|Salience)&(Default_mode|Motor) |
| Edge (Functional connectivity) | Pheno439 | Net100_Pair19_22 | (Precuneus|Cuneus|Cingulate)&(Temporal_Sup) | (Default_mode|Central_executive)&(Default_mode|Motor) |
| Edge (Functional connectivity) | Pheno440 | Net100_Pair20_22 | (Postcentral|Precentral)&(Temporal_Sup) | (Motor|Attention)&(Default_mode|Motor) |
| Edge (Functional connectivity) | Pheno441 | Net100_Pair21_22 | (Frontal_Sup)&(Temporal_Sup) | (Default_mode|Central_executive)&(Default_mode|Motor) |
| Edge (Functional connectivity) | Pheno442 | Net100_Pair1_23 | (Calcarine|Lingual|Cuneus)&(Cerebellum) | (Visual)&(Subcortical-cerebellum) |
| Edge (Functional connectivity) | Pheno443 | Net100_Pair2_23 | (RolandicOper|SupraMarginal|Insula)&(Cerebellum) | (Salience|Motor)&(Subcortical-cerebellum) |
| Edge (Functional connectivity) | Pheno444 | Net100_Pair3_23 | (Lingual|Fusiform)&(Cerebellum) | (Visual)&(Subcortical-cerebellum) |
| Edge (Functional connectivity) | Pheno445 | Net100_Pair4_23 | (Occipital)&(Cerebellum) | (Attention|Visual)&(Subcortical-cerebellum) |
| Edge (Functional connectivity) | Pheno446 | Net100_Pair5_23 | (Precuneus|Angular|Cingulate)&(Cerebellum) | (Default_mode|Central_executive)&(Subcortical-cerebellum) |
| Edge (Functional connectivity) | Pheno447 | Net100_Pair6_23 | (Postcentral|Precentral)&(Cerebellum) | (Motor)&(Subcortical-cerebellum) |
| Edge (Functional connectivity) | Pheno448 | Net100_Pair7_23 | (Frontal|Cingulate)&(Cerebellum) | (Default_mode|Limbic)&(Subcortical-cerebellum) |
| Edge (Functional connectivity) | Pheno449 | Net100_Pair8_23 | (Calcarine|Lingual)&(Cerebellum) | (Visual)&(Subcortical-cerebellum) |
| Edge (Functional connectivity) | Pheno450 | Net100_Pair9_23 | (Temporal)&(Cerebellum) | (Default_mode)&(Subcortical-cerebellum) |
| Edge (Functional connectivity) | Pheno451 | Net100_Pair10_23 | (OccipitalPrecuneus)&(Cerebellum) | (Default_mode|Central_executive)&(Subcortical-cerebellum) |
| Edge (Functional connectivity) | Pheno452 | Net100_Pair11_23 | (Angular|Temporal)&(Cerebellum) | (Default_mode|Central_executive)&(Subcortical-cerebellum) |
| Edge (Functional connectivity) | Pheno453 | Net100_Pair12_23 | (Frontal|Cerebellum)&(Cerebellum) | (Central_executive|Default_mode)&(Subcortical-cerebellum) |
| Edge (Functional connectivity) | Pheno454 | Net100_Pair13_23 | (Frontal_Sup)&(Cerebellum) | (Default_mode)&(Subcortical-cerebellum) |
| Edge (Functional connectivity) | Pheno455 | Net100_Pair14_23 | (Cuneus|Occipital)&(Cerebellum) | (Visual)&(Subcortical-cerebellum) |
| Edge (Functional connectivity) | Pheno456 | Net100_Pair15_23 | (Insula|Cingulate)&(Cerebellum) | (Salience|Default_mode)&(Subcortical-cerebellum) |
| Edge (Functional connectivity) | Pheno457 | Net100_Pair16_23 | (Occipital)&(Cerebellum) | (Visual)&(Subcortical-cerebellum) |
| Edge (Functional connectivity) | Pheno458 | Net100_Pair17_23 | (Cerebellum)&(Cerebellum) | (Subcortical-cerebellum)&(Subcortical-cerebellum) |
| Edge (Functional connectivity) | Pheno459 | Net100_Pair18_23 | (Parietal)&(Cerebellum) | (Attention|Central_executive|Salience)&(Subcortical-cerebellum) |
| Edge (Functional connectivity) | Pheno460 | Net100_Pair19_23 | (Precuneus|Cuneus|Cingulate)&(Cerebellum) | (Default_mode|Central_executive)&(Subcortical-cerebellum) |
| Edge (Functional connectivity) | Pheno461 | Net100_Pair20_23 | (Postcentral|Precentral)&(Cerebellum) | (Motor|Attention)&(Subcortical-cerebellum) |
| Edge (Functional connectivity) | Pheno462 | Net100_Pair21_23 | (Frontal_Sup)&(Cerebellum) | (Default_mode|Central_executive)&(Subcortical-cerebellum) |
| Edge (Functional connectivity) | Pheno463 | Net100_Pair22_23 | (Temporal_Sup)&(Cerebellum) | (Default_mode|Motor)&(Subcortical-cerebellum) |
| Edge (Functional connectivity) | Pheno464 | Net100_Pair1_24 | (Calcarine|Lingual|Cuneus)&(Parietal) | (Visual)&(Central_executive|Attention) |
| Edge (Functional connectivity) | Pheno465 | Net100_Pair2_24 | (RolandicOper|SupraMarginal|Insula)&(Parietal) | (Salience|Motor)&(Central_executive|Attention) |
| Edge (Functional connectivity) | Pheno466 | Net100_Pair3_24 | (Lingual|Fusiform)&(Parietal) | (Visual)&(Central_executive|Attention) |
| Edge (Functional connectivity) | Pheno467 | Net100_Pair4_24 | (Occipital)&(Parietal) | (Attention|Visual)&(Central_executive|Attention) |
| Edge (Functional connectivity) | Pheno468 | Net100_Pair5_24 | (Precuneus|Angular|Cingulate)&(Parietal) | (Default_mode|Central_executive)&(Central_executive|Attention) |
| Edge (Functional connectivity) | Pheno469 | Net100_Pair6_24 | (Postcentral|Precentral)&(Parietal) | (Motor)&(Central_executive|Attention) |
| Edge (Functional connectivity) | Pheno470 | Net100_Pair7_24 | (Frontal|Cingulate)&(Parietal) | (Default_mode|Limbic)&(Central_executive|Attention) |
| Edge (Functional connectivity) | Pheno471 | Net100_Pair8_24 | (Calcarine|Lingual)&(Parietal) | (Visual)&(Central_executive|Attention) |
| Edge (Functional connectivity) | Pheno472 | Net100_Pair9_24 | (Temporal)&(Parietal) | (Default_mode)&(Central_executive|Attention) |
| Edge (Functional connectivity) | Pheno473 | Net100_Pair10_24 | (OccipitalPrecuneus)&(Parietal) | (Default_mode|Central_executive)&(Central_executive|Attention) |
| Edge (Functional connectivity) | Pheno474 | Net100_Pair11_24 | (Angular|Temporal)&(Parietal) | (Default_mode|Central_executive)&(Central_executive|Attention) |
| Edge (Functional connectivity) | Pheno475 | Net100_Pair12_24 | (Frontal|Cerebellum)&(Parietal) | (Central_executive|Default_mode)&(Central_executive|Attention) |
| Edge (Functional connectivity) | Pheno476 | Net100_Pair13_24 | (Frontal_Sup)&(Parietal) | (Default_mode)&(Central_executive|Attention) |
| Edge (Functional connectivity) | Pheno477 | Net100_Pair14_24 | (Cuneus|Occipital)&(Parietal) | (Visual)&(Central_executive|Attention) |
| Edge (Functional connectivity) | Pheno478 | Net100_Pair15_24 | (Insula|Cingulate)&(Parietal) | (Salience|Default_mode)&(Central_executive|Attention) |
| Edge (Functional connectivity) | Pheno479 | Net100_Pair16_24 | (Occipital)&(Parietal) | (Visual)&(Central_executive|Attention) |
| Edge (Functional connectivity) | Pheno480 | Net100_Pair17_24 | (Cerebellum)&(Parietal) | (Subcortical-cerebellum)&(Central_executive|Attention) |
| Edge (Functional connectivity) | Pheno481 | Net100_Pair18_24 | (Parietal)&(Parietal) | (Attention|Central_executive|Salience)&(Central_executive|Attention) |
| Edge (Functional connectivity) | Pheno482 | Net100_Pair19_24 | (Precuneus|Cuneus|Cingulate)&(Parietal) | (Default_mode|Central_executive)&(Central_executive|Attention) |
| Edge (Functional connectivity) | Pheno483 | Net100_Pair20_24 | (Postcentral|Precentral)&(Parietal) | (Motor|Attention)&(Central_executive|Attention) |
| Edge (Functional connectivity) | Pheno484 | Net100_Pair21_24 | (Frontal_Sup)&(Parietal) | (Default_mode|Central_executive)&(Central_executive|Attention) |
| Edge (Functional connectivity) | Pheno485 | Net100_Pair22_24 | (Temporal_Sup)&(Parietal) | (Default_mode|Motor)&(Central_executive|Attention) |
| Edge (Functional connectivity) | Pheno486 | Net100_Pair23_24 | (Cerebellum)&(Parietal) | (Subcortical-cerebellum)&(Central_executive|Attention) |
| Edge (Functional connectivity) | Pheno487 | Net100_Pair1_25 | (Calcarine|Lingual|Cuneus)&(Frontal|Precentral) | (Visual)&(Central_executive) |
| Edge (Functional connectivity) | Pheno488 | Net100_Pair2_25 | (RolandicOper|SupraMarginal|Insula)&(Frontal|Precentral) | (Salience|Motor)&(Central_executive) |
| Edge (Functional connectivity) | Pheno489 | Net100_Pair3_25 | (Lingual|Fusiform)&(Frontal|Precentral) | (Visual)&(Central_executive) |
| Edge (Functional connectivity) | Pheno490 | Net100_Pair4_25 | (Occipital)&(Frontal|Precentral) | (Attention|Visual)&(Central_executive) |
| Edge (Functional connectivity) | Pheno491 | Net100_Pair5_25 | (Precuneus|Angular|Cingulate)&(Frontal|Precentral) | (Default_mode|Central_executive)&(Central_executive) |
| Edge (Functional connectivity) | Pheno492 | Net100_Pair6_25 | (Postcentral|Precentral)&(Frontal|Precentral) | (Motor)&(Central_executive) |
| Edge (Functional connectivity) | Pheno493 | Net100_Pair7_25 | (Frontal|Cingulate)&(Frontal|Precentral) | (Default_mode|Limbic)&(Central_executive) |
| Edge (Functional connectivity) | Pheno494 | Net100_Pair8_25 | (Calcarine|Lingual)&(Frontal|Precentral) | (Visual)&(Central_executive) |
| Edge (Functional connectivity) | Pheno495 | Net100_Pair9_25 | (Temporal)&(Frontal|Precentral) | (Default_mode)&(Central_executive) |
| Edge (Functional connectivity) | Pheno496 | Net100_Pair10_25 | (OccipitalPrecuneus)&(Frontal|Precentral) | (Default_mode|Central_executive)&(Central_executive) |
| Edge (Functional connectivity) | Pheno497 | Net100_Pair11_25 | (Angular|Temporal)&(Frontal|Precentral) | (Default_mode|Central_executive)&(Central_executive) |
| Edge (Functional connectivity) | Pheno498 | Net100_Pair12_25 | (Frontal|Cerebellum)&(Frontal|Precentral) | (Central_executive|Default_mode)&(Central_executive) |
| Edge (Functional connectivity) | Pheno499 | Net100_Pair13_25 | (Frontal_Sup)&(Frontal|Precentral) | (Default_mode)&(Central_executive) |
| Edge (Functional connectivity) | Pheno500 | Net100_Pair14_25 | (Cuneus|Occipital)&(Frontal|Precentral) | (Visual)&(Central_executive) |
| Edge (Functional connectivity) | Pheno501 | Net100_Pair15_25 | (Insula|Cingulate)&(Frontal|Precentral) | (Salience|Default_mode)&(Central_executive) |
| Edge (Functional connectivity) | Pheno502 | Net100_Pair16_25 | (Occipital)&(Frontal|Precentral) | (Visual)&(Central_executive) |
| Edge (Functional connectivity) | Pheno503 | Net100_Pair17_25 | (Cerebellum)&(Frontal|Precentral) | (Subcortical-cerebellum)&(Central_executive) |
| Edge (Functional connectivity) | Pheno504 | Net100_Pair18_25 | (Parietal)&(Frontal|Precentral) | (Attention|Central_executive|Salience)&(Central_executive) |
| Edge (Functional connectivity) | Pheno505 | Net100_Pair19_25 | (Precuneus|Cuneus|Cingulate)&(Frontal|Precentral) | (Default_mode|Central_executive)&(Central_executive) |
| Edge (Functional connectivity) | Pheno506 | Net100_Pair20_25 | (Postcentral|Precentral)&(Frontal|Precentral) | (Motor|Attention)&(Central_executive) |
| Edge (Functional connectivity) | Pheno507 | Net100_Pair21_25 | (Frontal_Sup)&(Frontal|Precentral) | (Default_mode|Central_executive)&(Central_executive) |
| Edge (Functional connectivity) | Pheno508 | Net100_Pair22_25 | (Temporal_Sup)&(Frontal|Precentral) | (Default_mode|Motor)&(Central_executive) |
| Edge (Functional connectivity) | Pheno509 | Net100_Pair23_25 | (Cerebellum)&(Frontal|Precentral) | (Subcortical-cerebellum)&(Central_executive) |
| Edge (Functional connectivity) | Pheno510 | Net100_Pair24_25 | (Parietal)&(Frontal|Precentral) | (Central_executive|Attention)&(Central_executive) |
| Edge (Functional connectivity) | Pheno511 | Net100_Pair1_26 | (Calcarine|Lingual|Cuneus)&(Parietal|Frontal) | (Visual)&(Attention|Central_executive) |
| Edge (Functional connectivity) | Pheno512 | Net100_Pair2_26 | (RolandicOper|SupraMarginal|Insula)&(Parietal|Frontal) | (Salience|Motor)&(Attention|Central_executive) |
| Edge (Functional connectivity) | Pheno513 | Net100_Pair3_26 | (Lingual|Fusiform)&(Parietal|Frontal) | (Visual)&(Attention|Central_executive) |
| Edge (Functional connectivity) | Pheno514 | Net100_Pair4_26 | (Occipital)&(Parietal|Frontal) | (Attention|Visual)&(Attention|Central_executive) |
| Edge (Functional connectivity) | Pheno515 | Net100_Pair5_26 | (Precuneus|Angular|Cingulate)&(Parietal|Frontal) | (Default_mode|Central_executive)&(Attention|Central_executive) |
| Edge (Functional connectivity) | Pheno516 | Net100_Pair6_26 | (Postcentral|Precentral)&(Parietal|Frontal) | (Motor)&(Attention|Central_executive) |
| Edge (Functional connectivity) | Pheno517 | Net100_Pair7_26 | (Frontal|Cingulate)&(Parietal|Frontal) | (Default_mode|Limbic)&(Attention|Central_executive) |
| Edge (Functional connectivity) | Pheno518 | Net100_Pair8_26 | (Calcarine|Lingual)&(Parietal|Frontal) | (Visual)&(Attention|Central_executive) |
| Edge (Functional connectivity) | Pheno519 | Net100_Pair9_26 | (Temporal)&(Parietal|Frontal) | (Default_mode)&(Attention|Central_executive) |
| Edge (Functional connectivity) | Pheno520 | Net100_Pair10_26 | (OccipitalPrecuneus)&(Parietal|Frontal) | (Default_mode|Central_executive)&(Attention|Central_executive) |
| Edge (Functional connectivity) | Pheno521 | Net100_Pair11_26 | (Angular|Temporal)&(Parietal|Frontal) | (Default_mode|Central_executive)&(Attention|Central_executive) |
| Edge (Functional connectivity) | Pheno522 | Net100_Pair12_26 | (Frontal|Cerebellum)&(Parietal|Frontal) | (Central_executive|Default_mode)&(Attention|Central_executive) |
| Edge (Functional connectivity) | Pheno523 | Net100_Pair13_26 | (Frontal_Sup)&(Parietal|Frontal) | (Default_mode)&(Attention|Central_executive) |
| Edge (Functional connectivity) | Pheno524 | Net100_Pair14_26 | (Cuneus|Occipital)&(Parietal|Frontal) | (Visual)&(Attention|Central_executive) |
| Edge (Functional connectivity) | Pheno525 | Net100_Pair15_26 | (Insula|Cingulate)&(Parietal|Frontal) | (Salience|Default_mode)&(Attention|Central_executive) |
| Edge (Functional connectivity) | Pheno526 | Net100_Pair16_26 | (Occipital)&(Parietal|Frontal) | (Visual)&(Attention|Central_executive) |
| Edge (Functional connectivity) | Pheno527 | Net100_Pair17_26 | (Cerebellum)&(Parietal|Frontal) | (Subcortical-cerebellum)&(Attention|Central_executive) |
| Edge (Functional connectivity) | Pheno528 | Net100_Pair18_26 | (Parietal)&(Parietal|Frontal) | (Attention|Central_executive|Salience)&(Attention|Central_executive) |
| Edge (Functional connectivity) | Pheno529 | Net100_Pair19_26 | (Precuneus|Cuneus|Cingulate)&(Parietal|Frontal) | (Default_mode|Central_executive)&(Attention|Central_executive) |
| Edge (Functional connectivity) | Pheno530 | Net100_Pair20_26 | (Postcentral|Precentral)&(Parietal|Frontal) | (Motor|Attention)&(Attention|Central_executive) |
| Edge (Functional connectivity) | Pheno531 | Net100_Pair21_26 | (Frontal_Sup)&(Parietal|Frontal) | (Default_mode|Central_executive)&(Attention|Central_executive) |
| Edge (Functional connectivity) | Pheno532 | Net100_Pair22_26 | (Temporal_Sup)&(Parietal|Frontal) | (Default_mode|Motor)&(Attention|Central_executive) |
| Edge (Functional connectivity) | Pheno533 | Net100_Pair23_26 | (Cerebellum)&(Parietal|Frontal) | (Subcortical-cerebellum)&(Attention|Central_executive) |
| Edge (Functional connectivity) | Pheno534 | Net100_Pair24_26 | (Parietal)&(Parietal|Frontal) | (Central_executive|Attention)&(Attention|Central_executive) |
| Edge (Functional connectivity) | Pheno535 | Net100_Pair25_26 | (Frontal|Precentral)&(Parietal|Frontal) | (Central_executive)&(Attention|Central_executive) |
| Edge (Functional connectivity) | Pheno536 | Net100_Pair1_27 | (Calcarine|Lingual|Cuneus)&(Precentral|Frontal|Supp_Motor_Area) | (Visual)&(Attention|Salience|Motor) |
| Edge (Functional connectivity) | Pheno537 | Net100_Pair2_27 | (RolandicOper|SupraMarginal|Insula)&(Precentral|Frontal|Supp_Motor_Area) | (Salience|Motor)&(Attention|Salience|Motor) |
| Edge (Functional connectivity) | Pheno538 | Net100_Pair3_27 | (Lingual|Fusiform)&(Precentral|Frontal|Supp_Motor_Area) | (Visual)&(Attention|Salience|Motor) |
| Edge (Functional connectivity) | Pheno539 | Net100_Pair4_27 | (Occipital)&(Precentral|Frontal|Supp_Motor_Area) | (Attention|Visual)&(Attention|Salience|Motor) |
| Edge (Functional connectivity) | Pheno540 | Net100_Pair5_27 | (Precuneus|Angular|Cingulate)&(Precentral|Frontal|Supp_Motor_Area) | (Default_mode|Central_executive)&(Attention|Salience|Motor) |
| Edge (Functional connectivity) | Pheno541 | Net100_Pair6_27 | (Postcentral|Precentral)&(Precentral|Frontal|Supp_Motor_Area) | (Motor)&(Attention|Salience|Motor) |
| Edge (Functional connectivity) | Pheno542 | Net100_Pair7_27 | (Frontal|Cingulate)&(Precentral|Frontal|Supp_Motor_Area) | (Default_mode|Limbic)&(Attention|Salience|Motor) |
| Edge (Functional connectivity) | Pheno543 | Net100_Pair8_27 | (Calcarine|Lingual)&(Precentral|Frontal|Supp_Motor_Area) | (Visual)&(Attention|Salience|Motor) |
| Edge (Functional connectivity) | Pheno544 | Net100_Pair9_27 | (Temporal)&(Precentral|Frontal|Supp_Motor_Area) | (Default_mode)&(Attention|Salience|Motor) |
| Edge (Functional connectivity) | Pheno545 | Net100_Pair10_27 | (OccipitalPrecuneus)&(Precentral|Frontal|Supp_Motor_Area) | (Default_mode|Central_executive)&(Attention|Salience|Motor) |
| Edge (Functional connectivity) | Pheno546 | Net100_Pair11_27 | (Angular|Temporal)&(Precentral|Frontal|Supp_Motor_Area) | (Default_mode|Central_executive)&(Attention|Salience|Motor) |
| Edge (Functional connectivity) | Pheno547 | Net100_Pair12_27 | (Frontal|Cerebellum)&(Precentral|Frontal|Supp_Motor_Area) | (Central_executive|Default_mode)&(Attention|Salience|Motor) |
| Edge (Functional connectivity) | Pheno548 | Net100_Pair13_27 | (Frontal_Sup)&(Precentral|Frontal|Supp_Motor_Area) | (Default_mode)&(Attention|Salience|Motor) |
| Edge (Functional connectivity) | Pheno549 | Net100_Pair14_27 | (Cuneus|Occipital)&(Precentral|Frontal|Supp_Motor_Area) | (Visual)&(Attention|Salience|Motor) |
| Edge (Functional connectivity) | Pheno550 | Net100_Pair15_27 | (Insula|Cingulate)&(Precentral|Frontal|Supp_Motor_Area) | (Salience|Default_mode)&(Attention|Salience|Motor) |
| Edge (Functional connectivity) | Pheno551 | Net100_Pair16_27 | (Occipital)&(Precentral|Frontal|Supp_Motor_Area) | (Visual)&(Attention|Salience|Motor) |
| Edge (Functional connectivity) | Pheno552 | Net100_Pair17_27 | (Cerebellum)&(Precentral|Frontal|Supp_Motor_Area) | (Subcortical-cerebellum)&(Attention|Salience|Motor) |
| Edge (Functional connectivity) | Pheno553 | Net100_Pair18_27 | (Parietal)&(Precentral|Frontal|Supp_Motor_Area) | (Attention|Central_executive|Salience)&(Attention|Salience|Motor) |
| Edge (Functional connectivity) | Pheno554 | Net100_Pair19_27 | (Precuneus|Cuneus|Cingulate)&(Precentral|Frontal|Supp_Motor_Area) | (Default_mode|Central_executive)&(Attention|Salience|Motor) |
| Edge (Functional connectivity) | Pheno555 | Net100_Pair20_27 | (Postcentral|Precentral)&(Precentral|Frontal|Supp_Motor_Area) | (Motor|Attention)&(Attention|Salience|Motor) |
| Edge (Functional connectivity) | Pheno556 | Net100_Pair21_27 | (Frontal_Sup)&(Precentral|Frontal|Supp_Motor_Area) | (Default_mode|Central_executive)&(Attention|Salience|Motor) |
| Edge (Functional connectivity) | Pheno557 | Net100_Pair22_27 | (Temporal_Sup)&(Precentral|Frontal|Supp_Motor_Area) | (Default_mode|Motor)&(Attention|Salience|Motor) |
| Edge (Functional connectivity) | Pheno558 | Net100_Pair23_27 | (Cerebellum)&(Precentral|Frontal|Supp_Motor_Area) | (Subcortical-cerebellum)&(Attention|Salience|Motor) |
| Edge (Functional connectivity) | Pheno559 | Net100_Pair24_27 | (Parietal)&(Precentral|Frontal|Supp_Motor_Area) | (Central_executive|Attention)&(Attention|Salience|Motor) |
| Edge (Functional connectivity) | Pheno560 | Net100_Pair25_27 | (Frontal|Precentral)&(Precentral|Frontal|Supp_Motor_Area) | (Central_executive)&(Attention|Salience|Motor) |
| Edge (Functional connectivity) | Pheno561 | Net100_Pair26_27 | (Parietal|Frontal)&(Precentral|Frontal|Supp_Motor_Area) | (Attention|Central_executive)&(Attention|Salience|Motor) |
| Edge (Functional connectivity) | Pheno562 | Net100_Pair1_28 | (Calcarine|Lingual|Cuneus)&(Supp_Motor_Area|Frontal) | (Visual)&(Salience|Default_mode) |
| Edge (Functional connectivity) | Pheno563 | Net100_Pair2_28 | (RolandicOper|SupraMarginal|Insula)&(Supp_Motor_Area|Frontal) | (Salience|Motor)&(Salience|Default_mode) |
| Edge (Functional connectivity) | Pheno564 | Net100_Pair3_28 | (Lingual|Fusiform)&(Supp_Motor_Area|Frontal) | (Visual)&(Salience|Default_mode) |
| Edge (Functional connectivity) | Pheno565 | Net100_Pair4_28 | (Occipital)&(Supp_Motor_Area|Frontal) | (Attention|Visual)&(Salience|Default_mode) |
| Edge (Functional connectivity) | Pheno566 | Net100_Pair5_28 | (Precuneus|Angular|Cingulate)&(Supp_Motor_Area|Frontal) | (Default_mode|Central_executive)&(Salience|Default_mode) |
| Edge (Functional connectivity) | Pheno567 | Net100_Pair6_28 | (Postcentral|Precentral)&(Supp_Motor_Area|Frontal) | (Motor)&(Salience|Default_mode) |
| Edge (Functional connectivity) | Pheno568 | Net100_Pair7_28 | (Frontal|Cingulate)&(Supp_Motor_Area|Frontal) | (Default_mode|Limbic)&(Salience|Default_mode) |
| Edge (Functional connectivity) | Pheno569 | Net100_Pair8_28 | (Calcarine|Lingual)&(Supp_Motor_Area|Frontal) | (Visual)&(Salience|Default_mode) |
| Edge (Functional connectivity) | Pheno570 | Net100_Pair9_28 | (Temporal)&(Supp_Motor_Area|Frontal) | (Default_mode)&(Salience|Default_mode) |
| Edge (Functional connectivity) | Pheno571 | Net100_Pair10_28 | (OccipitalPrecuneus)&(Supp_Motor_Area|Frontal) | (Default_mode|Central_executive)&(Salience|Default_mode) |
| Edge (Functional connectivity) | Pheno572 | Net100_Pair11_28 | (Angular|Temporal)&(Supp_Motor_Area|Frontal) | (Default_mode|Central_executive)&(Salience|Default_mode) |
| Edge (Functional connectivity) | Pheno573 | Net100_Pair12_28 | (Frontal|Cerebellum)&(Supp_Motor_Area|Frontal) | (Central_executive|Default_mode)&(Salience|Default_mode) |
| Edge (Functional connectivity) | Pheno574 | Net100_Pair13_28 | (Frontal_Sup)&(Supp_Motor_Area|Frontal) | (Default_mode)&(Salience|Default_mode) |
| Edge (Functional connectivity) | Pheno575 | Net100_Pair14_28 | (Cuneus|Occipital)&(Supp_Motor_Area|Frontal) | (Visual)&(Salience|Default_mode) |
| Edge (Functional connectivity) | Pheno576 | Net100_Pair15_28 | (Insula|Cingulate)&(Supp_Motor_Area|Frontal) | (Salience|Default_mode)&(Salience|Default_mode) |
| Edge (Functional connectivity) | Pheno577 | Net100_Pair16_28 | (Occipital)&(Supp_Motor_Area|Frontal) | (Visual)&(Salience|Default_mode) |
| Edge (Functional connectivity) | Pheno578 | Net100_Pair17_28 | (Cerebellum)&(Supp_Motor_Area|Frontal) | (Subcortical-cerebellum)&(Salience|Default_mode) |
| Edge (Functional connectivity) | Pheno579 | Net100_Pair18_28 | (Parietal)&(Supp_Motor_Area|Frontal) | (Attention|Central_executive|Salience)&(Salience|Default_mode) |
| Edge (Functional connectivity) | Pheno580 | Net100_Pair19_28 | (Precuneus|Cuneus|Cingulate)&(Supp_Motor_Area|Frontal) | (Default_mode|Central_executive)&(Salience|Default_mode) |
| Edge (Functional connectivity) | Pheno581 | Net100_Pair20_28 | (Postcentral|Precentral)&(Supp_Motor_Area|Frontal) | (Motor|Attention)&(Salience|Default_mode) |
| Edge (Functional connectivity) | Pheno582 | Net100_Pair21_28 | (Frontal_Sup)&(Supp_Motor_Area|Frontal) | (Default_mode|Central_executive)&(Salience|Default_mode) |
| Edge (Functional connectivity) | Pheno583 | Net100_Pair22_28 | (Temporal_Sup)&(Supp_Motor_Area|Frontal) | (Default_mode|Motor)&(Salience|Default_mode) |
| Edge (Functional connectivity) | Pheno584 | Net100_Pair23_28 | (Cerebellum)&(Supp_Motor_Area|Frontal) | (Subcortical-cerebellum)&(Salience|Default_mode) |
| Edge (Functional connectivity) | Pheno585 | Net100_Pair24_28 | (Parietal)&(Supp_Motor_Area|Frontal) | (Central_executive|Attention)&(Salience|Default_mode) |
| Edge (Functional connectivity) | Pheno586 | Net100_Pair25_28 | (Frontal|Precentral)&(Supp_Motor_Area|Frontal) | (Central_executive)&(Salience|Default_mode) |
| Edge (Functional connectivity) | Pheno587 | Net100_Pair26_28 | (Parietal|Frontal)&(Supp_Motor_Area|Frontal) | (Attention|Central_executive)&(Salience|Default_mode) |
| Edge (Functional connectivity) | Pheno588 | Net100_Pair27_28 | (Precentral|Frontal|Supp_Motor_Area)&(Supp_Motor_Area|Frontal) | (Attention|Salience|Motor)&(Salience|Default_mode) |
| Edge (Functional connectivity) | Pheno589 | Net100_Pair1_29 | (Calcarine|Lingual|Cuneus)&(Parietal) | (Visual)&(Central_executive|Salience) |
| Edge (Functional connectivity) | Pheno590 | Net100_Pair2_29 | (RolandicOper|SupraMarginal|Insula)&(Parietal) | (Salience|Motor)&(Central_executive|Salience) |
| Edge (Functional connectivity) | Pheno591 | Net100_Pair3_29 | (Lingual|Fusiform)&(Parietal) | (Visual)&(Central_executive|Salience) |
| Edge (Functional connectivity) | Pheno592 | Net100_Pair4_29 | (Occipital)&(Parietal) | (Attention|Visual)&(Central_executive|Salience) |
| Edge (Functional connectivity) | Pheno593 | Net100_Pair5_29 | (Precuneus|Angular|Cingulate)&(Parietal) | (Default_mode|Central_executive)&(Central_executive|Salience) |
| Edge (Functional connectivity) | Pheno594 | Net100_Pair6_29 | (Postcentral|Precentral)&(Parietal) | (Motor)&(Central_executive|Salience) |
| Edge (Functional connectivity) | Pheno595 | Net100_Pair7_29 | (Frontal|Cingulate)&(Parietal) | (Default_mode|Limbic)&(Central_executive|Salience) |
| Edge (Functional connectivity) | Pheno596 | Net100_Pair8_29 | (Calcarine|Lingual)&(Parietal) | (Visual)&(Central_executive|Salience) |
| Edge (Functional connectivity) | Pheno597 | Net100_Pair9_29 | (Temporal)&(Parietal) | (Default_mode)&(Central_executive|Salience) |
| Edge (Functional connectivity) | Pheno598 | Net100_Pair10_29 | (OccipitalPrecuneus)&(Parietal) | (Default_mode|Central_executive)&(Central_executive|Salience) |
| Edge (Functional connectivity) | Pheno599 | Net100_Pair11_29 | (Angular|Temporal)&(Parietal) | (Default_mode|Central_executive)&(Central_executive|Salience) |
| Edge (Functional connectivity) | Pheno600 | Net100_Pair12_29 | (Frontal|Cerebellum)&(Parietal) | (Central_executive|Default_mode)&(Central_executive|Salience) |
| Edge (Functional connectivity) | Pheno601 | Net100_Pair13_29 | (Frontal_Sup)&(Parietal) | (Default_mode)&(Central_executive|Salience) |
| Edge (Functional connectivity) | Pheno602 | Net100_Pair14_29 | (Cuneus|Occipital)&(Parietal) | (Visual)&(Central_executive|Salience) |
| Edge (Functional connectivity) | Pheno603 | Net100_Pair15_29 | (Insula|Cingulate)&(Parietal) | (Salience|Default_mode)&(Central_executive|Salience) |
| Edge (Functional connectivity) | Pheno604 | Net100_Pair16_29 | (Occipital)&(Parietal) | (Visual)&(Central_executive|Salience) |
| Edge (Functional connectivity) | Pheno605 | Net100_Pair17_29 | (Cerebellum)&(Parietal) | (Subcortical-cerebellum)&(Central_executive|Salience) |
| Edge (Functional connectivity) | Pheno606 | Net100_Pair18_29 | (Parietal)&(Parietal) | (Attention|Central_executive|Salience)&(Central_executive|Salience) |
| Edge (Functional connectivity) | Pheno607 | Net100_Pair19_29 | (Precuneus|Cuneus|Cingulate)&(Parietal) | (Default_mode|Central_executive)&(Central_executive|Salience) |
| Edge (Functional connectivity) | Pheno608 | Net100_Pair20_29 | (Postcentral|Precentral)&(Parietal) | (Motor|Attention)&(Central_executive|Salience) |
| Edge (Functional connectivity) | Pheno609 | Net100_Pair21_29 | (Frontal_Sup)&(Parietal) | (Default_mode|Central_executive)&(Central_executive|Salience) |
| Edge (Functional connectivity) | Pheno610 | Net100_Pair22_29 | (Temporal_Sup)&(Parietal) | (Default_mode|Motor)&(Central_executive|Salience) |
| Edge (Functional connectivity) | Pheno611 | Net100_Pair23_29 | (Cerebellum)&(Parietal) | (Subcortical-cerebellum)&(Central_executive|Salience) |
| Edge (Functional connectivity) | Pheno612 | Net100_Pair24_29 | (Parietal)&(Parietal) | (Central_executive|Attention)&(Central_executive|Salience) |
| Edge (Functional connectivity) | Pheno613 | Net100_Pair25_29 | (Frontal|Precentral)&(Parietal) | (Central_executive)&(Central_executive|Salience) |
| Edge (Functional connectivity) | Pheno614 | Net100_Pair26_29 | (Parietal|Frontal)&(Parietal) | (Attention|Central_executive)&(Central_executive|Salience) |
| Edge (Functional connectivity) | Pheno615 | Net100_Pair27_29 | (Precentral|Frontal|Supp_Motor_Area)&(Parietal) | (Attention|Salience|Motor)&(Central_executive|Salience) |
| Edge (Functional connectivity) | Pheno616 | Net100_Pair28_29 | (Supp_Motor_Area|Frontal)&(Parietal) | (Salience|Default_mode)&(Central_executive|Salience) |
| Edge (Functional connectivity) | Pheno617 | Net100_Pair1_30 | (Calcarine|Lingual|Cuneus)&(Paracentral) | (Visual)&(Motor) |
| Edge (Functional connectivity) | Pheno618 | Net100_Pair2_30 | (RolandicOper|SupraMarginal|Insula)&(Paracentral) | (Salience|Motor)&(Motor) |
| Edge (Functional connectivity) | Pheno619 | Net100_Pair3_30 | (Lingual|Fusiform)&(Paracentral) | (Visual)&(Motor) |
| Edge (Functional connectivity) | Pheno620 | Net100_Pair4_30 | (Occipital)&(Paracentral) | (Attention|Visual)&(Motor) |
| Edge (Functional connectivity) | Pheno621 | Net100_Pair5_30 | (Precuneus|Angular|Cingulate)&(Paracentral) | (Default_mode|Central_executive)&(Motor) |
| Edge (Functional connectivity) | Pheno622 | Net100_Pair6_30 | (Postcentral|Precentral)&(Paracentral) | (Motor)&(Motor) |
| Edge (Functional connectivity) | Pheno623 | Net100_Pair7_30 | (Frontal|Cingulate)&(Paracentral) | (Default_mode|Limbic)&(Motor) |
| Edge (Functional connectivity) | Pheno624 | Net100_Pair8_30 | (Calcarine|Lingual)&(Paracentral) | (Visual)&(Motor) |
| Edge (Functional connectivity) | Pheno625 | Net100_Pair9_30 | (Temporal)&(Paracentral) | (Default_mode)&(Motor) |
| Edge (Functional connectivity) | Pheno626 | Net100_Pair10_30 | (OccipitalPrecuneus)&(Paracentral) | (Default_mode|Central_executive)&(Motor) |
| Edge (Functional connectivity) | Pheno627 | Net100_Pair11_30 | (Angular|Temporal)&(Paracentral) | (Default_mode|Central_executive)&(Motor) |
| Edge (Functional connectivity) | Pheno628 | Net100_Pair12_30 | (Frontal|Cerebellum)&(Paracentral) | (Central_executive|Default_mode)&(Motor) |
| Edge (Functional connectivity) | Pheno629 | Net100_Pair13_30 | (Frontal_Sup)&(Paracentral) | (Default_mode)&(Motor) |
| Edge (Functional connectivity) | Pheno630 | Net100_Pair14_30 | (Cuneus|Occipital)&(Paracentral) | (Visual)&(Motor) |
| Edge (Functional connectivity) | Pheno631 | Net100_Pair15_30 | (Insula|Cingulate)&(Paracentral) | (Salience|Default_mode)&(Motor) |
| Edge (Functional connectivity) | Pheno632 | Net100_Pair16_30 | (Occipital)&(Paracentral) | (Visual)&(Motor) |
| Edge (Functional connectivity) | Pheno633 | Net100_Pair17_30 | (Cerebellum)&(Paracentral) | (Subcortical-cerebellum)&(Motor) |
| Edge (Functional connectivity) | Pheno634 | Net100_Pair18_30 | (Parietal)&(Paracentral) | (Attention|Central_executive|Salience)&(Motor) |
| Edge (Functional connectivity) | Pheno635 | Net100_Pair19_30 | (Precuneus|Cuneus|Cingulate)&(Paracentral) | (Default_mode|Central_executive)&(Motor) |
| Edge (Functional connectivity) | Pheno636 | Net100_Pair20_30 | (Postcentral|Precentral)&(Paracentral) | (Motor|Attention)&(Motor) |
| Edge (Functional connectivity) | Pheno637 | Net100_Pair21_30 | (Frontal_Sup)&(Paracentral) | (Default_mode|Central_executive)&(Motor) |
| Edge (Functional connectivity) | Pheno638 | Net100_Pair22_30 | (Temporal_Sup)&(Paracentral) | (Default_mode|Motor)&(Motor) |
| Edge (Functional connectivity) | Pheno639 | Net100_Pair23_30 | (Cerebellum)&(Paracentral) | (Subcortical-cerebellum)&(Motor) |
| Edge (Functional connectivity) | Pheno640 | Net100_Pair24_30 | (Parietal)&(Paracentral) | (Central_executive|Attention)&(Motor) |
| Edge (Functional connectivity) | Pheno641 | Net100_Pair25_30 | (Frontal|Precentral)&(Paracentral) | (Central_executive)&(Motor) |
| Edge (Functional connectivity) | Pheno642 | Net100_Pair26_30 | (Parietal|Frontal)&(Paracentral) | (Attention|Central_executive)&(Motor) |
| Edge (Functional connectivity) | Pheno643 | Net100_Pair27_30 | (Precentral|Frontal|Supp_Motor_Area)&(Paracentral) | (Attention|Salience|Motor)&(Motor) |
| Edge (Functional connectivity) | Pheno644 | Net100_Pair28_30 | (Supp_Motor_Area|Frontal)&(Paracentral) | (Salience|Default_mode)&(Motor) |
| Edge (Functional connectivity) | Pheno645 | Net100_Pair29_30 | (Parietal)&(Paracentral) | (Central_executive|Salience)&(Motor) |
| Edge (Functional connectivity) | Pheno646 | Net100_Pair1_31 | (Calcarine|Lingual|Cuneus)&(Frontal) | (Visual)&(Central_executive) |
| Edge (Functional connectivity) | Pheno647 | Net100_Pair2_31 | (RolandicOper|SupraMarginal|Insula)&(Frontal) | (Salience|Motor)&(Central_executive) |
| Edge (Functional connectivity) | Pheno648 | Net100_Pair3_31 | (Lingual|Fusiform)&(Frontal) | (Visual)&(Central_executive) |
| Edge (Functional connectivity) | Pheno649 | Net100_Pair4_31 | (Occipital)&(Frontal) | (Attention|Visual)&(Central_executive) |
| Edge (Functional connectivity) | Pheno650 | Net100_Pair5_31 | (Precuneus|Angular|Cingulate)&(Frontal) | (Default_mode|Central_executive)&(Central_executive) |
| Edge (Functional connectivity) | Pheno651 | Net100_Pair6_31 | (Postcentral|Precentral)&(Frontal) | (Motor)&(Central_executive) |
| Edge (Functional connectivity) | Pheno652 | Net100_Pair7_31 | (Frontal|Cingulate)&(Frontal) | (Default_mode|Limbic)&(Central_executive) |
| Edge (Functional connectivity) | Pheno653 | Net100_Pair8_31 | (Calcarine|Lingual)&(Frontal) | (Visual)&(Central_executive) |
| Edge (Functional connectivity) | Pheno654 | Net100_Pair9_31 | (Temporal)&(Frontal) | (Default_mode)&(Central_executive) |
| Edge (Functional connectivity) | Pheno655 | Net100_Pair10_31 | (OccipitalPrecuneus)&(Frontal) | (Default_mode|Central_executive)&(Central_executive) |
| Edge (Functional connectivity) | Pheno656 | Net100_Pair11_31 | (Angular|Temporal)&(Frontal) | (Default_mode|Central_executive)&(Central_executive) |
| Edge (Functional connectivity) | Pheno657 | Net100_Pair12_31 | (Frontal|Cerebellum)&(Frontal) | (Central_executive|Default_mode)&(Central_executive) |
| Edge (Functional connectivity) | Pheno658 | Net100_Pair13_31 | (Frontal_Sup)&(Frontal) | (Default_mode)&(Central_executive) |
| Edge (Functional connectivity) | Pheno659 | Net100_Pair14_31 | (Cuneus|Occipital)&(Frontal) | (Visual)&(Central_executive) |
| Edge (Functional connectivity) | Pheno660 | Net100_Pair15_31 | (Insula|Cingulate)&(Frontal) | (Salience|Default_mode)&(Central_executive) |
| Edge (Functional connectivity) | Pheno661 | Net100_Pair16_31 | (Occipital)&(Frontal) | (Visual)&(Central_executive) |
| Edge (Functional connectivity) | Pheno662 | Net100_Pair17_31 | (Cerebellum)&(Frontal) | (Subcortical-cerebellum)&(Central_executive) |
| Edge (Functional connectivity) | Pheno663 | Net100_Pair18_31 | (Parietal)&(Frontal) | (Attention|Central_executive|Salience)&(Central_executive) |
| Edge (Functional connectivity) | Pheno664 | Net100_Pair19_31 | (Precuneus|Cuneus|Cingulate)&(Frontal) | (Default_mode|Central_executive)&(Central_executive) |
| Edge (Functional connectivity) | Pheno665 | Net100_Pair20_31 | (Postcentral|Precentral)&(Frontal) | (Motor|Attention)&(Central_executive) |
| Edge (Functional connectivity) | Pheno666 | Net100_Pair21_31 | (Frontal_Sup)&(Frontal) | (Default_mode|Central_executive)&(Central_executive) |
| Edge (Functional connectivity) | Pheno667 | Net100_Pair22_31 | (Temporal_Sup)&(Frontal) | (Default_mode|Motor)&(Central_executive) |
| Edge (Functional connectivity) | Pheno668 | Net100_Pair23_31 | (Cerebellum)&(Frontal) | (Subcortical-cerebellum)&(Central_executive) |
| Edge (Functional connectivity) | Pheno669 | Net100_Pair24_31 | (Parietal)&(Frontal) | (Central_executive|Attention)&(Central_executive) |
| Edge (Functional connectivity) | Pheno670 | Net100_Pair25_31 | (Frontal|Precentral)&(Frontal) | (Central_executive)&(Central_executive) |
| Edge (Functional connectivity) | Pheno671 | Net100_Pair26_31 | (Parietal|Frontal)&(Frontal) | (Attention|Central_executive)&(Central_executive) |
| Edge (Functional connectivity) | Pheno672 | Net100_Pair27_31 | (Precentral|Frontal|Supp_Motor_Area)&(Frontal) | (Attention|Salience|Motor)&(Central_executive) |
| Edge (Functional connectivity) | Pheno673 | Net100_Pair28_31 | (Supp_Motor_Area|Frontal)&(Frontal) | (Salience|Default_mode)&(Central_executive) |
| Edge (Functional connectivity) | Pheno674 | Net100_Pair29_31 | (Parietal)&(Frontal) | (Central_executive|Salience)&(Central_executive) |
| Edge (Functional connectivity) | Pheno675 | Net100_Pair30_31 | (Paracentral)&(Frontal) | (Motor)&(Central_executive) |
| Edge (Functional connectivity) | Pheno676 | Net100_Pair1_32 | (Calcarine|Lingual|Cuneus)&(Postcentral|Precentral) | (Visual)&(Motor|Attention) |
| Edge (Functional connectivity) | Pheno677 | Net100_Pair2_32 | (RolandicOper|SupraMarginal|Insula)&(Postcentral|Precentral) | (Salience|Motor)&(Motor|Attention) |
| Edge (Functional connectivity) | Pheno678 | Net100_Pair3_32 | (Lingual|Fusiform)&(Postcentral|Precentral) | (Visual)&(Motor|Attention) |
| Edge (Functional connectivity) | Pheno679 | Net100_Pair4_32 | (Occipital)&(Postcentral|Precentral) | (Attention|Visual)&(Motor|Attention) |
| Edge (Functional connectivity) | Pheno680 | Net100_Pair5_32 | (Precuneus|Angular|Cingulate)&(Postcentral|Precentral) | (Default_mode|Central_executive)&(Motor|Attention) |
| Edge (Functional connectivity) | Pheno681 | Net100_Pair6_32 | (Postcentral|Precentral)&(Postcentral|Precentral) | (Motor)&(Motor|Attention) |
| Edge (Functional connectivity) | Pheno682 | Net100_Pair7_32 | (Frontal|Cingulate)&(Postcentral|Precentral) | (Default_mode|Limbic)&(Motor|Attention) |
| Edge (Functional connectivity) | Pheno683 | Net100_Pair8_32 | (Calcarine|Lingual)&(Postcentral|Precentral) | (Visual)&(Motor|Attention) |
| Edge (Functional connectivity) | Pheno684 | Net100_Pair9_32 | (Temporal)&(Postcentral|Precentral) | (Default_mode)&(Motor|Attention) |
| Edge (Functional connectivity) | Pheno685 | Net100_Pair10_32 | (OccipitalPrecuneus)&(Postcentral|Precentral) | (Default_mode|Central_executive)&(Motor|Attention) |
| Edge (Functional connectivity) | Pheno686 | Net100_Pair11_32 | (Angular|Temporal)&(Postcentral|Precentral) | (Default_mode|Central_executive)&(Motor|Attention) |
| Edge (Functional connectivity) | Pheno687 | Net100_Pair12_32 | (Frontal|Cerebellum)&(Postcentral|Precentral) | (Central_executive|Default_mode)&(Motor|Attention) |
| Edge (Functional connectivity) | Pheno688 | Net100_Pair13_32 | (Frontal_Sup)&(Postcentral|Precentral) | (Default_mode)&(Motor|Attention) |
| Edge (Functional connectivity) | Pheno689 | Net100_Pair14_32 | (Cuneus|Occipital)&(Postcentral|Precentral) | (Visual)&(Motor|Attention) |
| Edge (Functional connectivity) | Pheno690 | Net100_Pair15_32 | (Insula|Cingulate)&(Postcentral|Precentral) | (Salience|Default_mode)&(Motor|Attention) |
| Edge (Functional connectivity) | Pheno691 | Net100_Pair16_32 | (Occipital)&(Postcentral|Precentral) | (Visual)&(Motor|Attention) |
| Edge (Functional connectivity) | Pheno692 | Net100_Pair17_32 | (Cerebellum)&(Postcentral|Precentral) | (Subcortical-cerebellum)&(Motor|Attention) |
| Edge (Functional connectivity) | Pheno693 | Net100_Pair18_32 | (Parietal)&(Postcentral|Precentral) | (Attention|Central_executive|Salience)&(Motor|Attention) |
| Edge (Functional connectivity) | Pheno694 | Net100_Pair19_32 | (Precuneus|Cuneus|Cingulate)&(Postcentral|Precentral) | (Default_mode|Central_executive)&(Motor|Attention) |
| Edge (Functional connectivity) | Pheno695 | Net100_Pair20_32 | (Postcentral|Precentral)&(Postcentral|Precentral) | (Motor|Attention)&(Motor|Attention) |
| Edge (Functional connectivity) | Pheno696 | Net100_Pair21_32 | (Frontal_Sup)&(Postcentral|Precentral) | (Default_mode|Central_executive)&(Motor|Attention) |
| Edge (Functional connectivity) | Pheno697 | Net100_Pair22_32 | (Temporal_Sup)&(Postcentral|Precentral) | (Default_mode|Motor)&(Motor|Attention) |
| Edge (Functional connectivity) | Pheno698 | Net100_Pair23_32 | (Cerebellum)&(Postcentral|Precentral) | (Subcortical-cerebellum)&(Motor|Attention) |
| Edge (Functional connectivity) | Pheno699 | Net100_Pair24_32 | (Parietal)&(Postcentral|Precentral) | (Central_executive|Attention)&(Motor|Attention) |
| Edge (Functional connectivity) | Pheno700 | Net100_Pair25_32 | (Frontal|Precentral)&(Postcentral|Precentral) | (Central_executive)&(Motor|Attention) |
| Edge (Functional connectivity) | Pheno701 | Net100_Pair26_32 | (Parietal|Frontal)&(Postcentral|Precentral) | (Attention|Central_executive)&(Motor|Attention) |
| Edge (Functional connectivity) | Pheno702 | Net100_Pair27_32 | (Precentral|Frontal|Supp_Motor_Area)&(Postcentral|Precentral) | (Attention|Salience|Motor)&(Motor|Attention) |
| Edge (Functional connectivity) | Pheno703 | Net100_Pair28_32 | (Supp_Motor_Area|Frontal)&(Postcentral|Precentral) | (Salience|Default_mode)&(Motor|Attention) |
| Edge (Functional connectivity) | Pheno704 | Net100_Pair29_32 | (Parietal)&(Postcentral|Precentral) | (Central_executive|Salience)&(Motor|Attention) |
| Edge (Functional connectivity) | Pheno705 | Net100_Pair30_32 | (Paracentral)&(Postcentral|Precentral) | (Motor)&(Motor|Attention) |
| Edge (Functional connectivity) | Pheno706 | Net100_Pair31_32 | (Frontal)&(Postcentral|Precentral) | (Central_executive)&(Motor|Attention) |
| Edge (Functional connectivity) | Pheno707 | Net100_Pair1_33 | (Calcarine|Lingual|Cuneus)&(Temporal|Frontal|Supp_Motor_Area) | (Visual)&(Default_mode|Salience) |
| Edge (Functional connectivity) | Pheno708 | Net100_Pair2_33 | (RolandicOper|SupraMarginal|Insula)&(Temporal|Frontal|Supp_Motor_Area) | (Salience|Motor)&(Default_mode|Salience) |
| Edge (Functional connectivity) | Pheno709 | Net100_Pair3_33 | (Lingual|Fusiform)&(Temporal|Frontal|Supp_Motor_Area) | (Visual)&(Default_mode|Salience) |
| Edge (Functional connectivity) | Pheno710 | Net100_Pair4_33 | (Occipital)&(Temporal|Frontal|Supp_Motor_Area) | (Attention|Visual)&(Default_mode|Salience) |
| Edge (Functional connectivity) | Pheno711 | Net100_Pair5_33 | (Precuneus|Angular|Cingulate)&(Temporal|Frontal|Supp_Motor_Area) | (Default_mode|Central_executive)&(Default_mode|Salience) |
| Edge (Functional connectivity) | Pheno712 | Net100_Pair6_33 | (Postcentral|Precentral)&(Temporal|Frontal|Supp_Motor_Area) | (Motor)&(Default_mode|Salience) |
| Edge (Functional connectivity) | Pheno713 | Net100_Pair7_33 | (Frontal|Cingulate)&(Temporal|Frontal|Supp_Motor_Area) | (Default_mode|Limbic)&(Default_mode|Salience) |
| Edge (Functional connectivity) | Pheno714 | Net100_Pair8_33 | (Calcarine|Lingual)&(Temporal|Frontal|Supp_Motor_Area) | (Visual)&(Default_mode|Salience) |
| Edge (Functional connectivity) | Pheno715 | Net100_Pair9_33 | (Temporal)&(Temporal|Frontal|Supp_Motor_Area) | (Default_mode)&(Default_mode|Salience) |
| Edge (Functional connectivity) | Pheno716 | Net100_Pair10_33 | (OccipitalPrecuneus)&(Temporal|Frontal|Supp_Motor_Area) | (Default_mode|Central_executive)&(Default_mode|Salience) |
| Edge (Functional connectivity) | Pheno717 | Net100_Pair11_33 | (Angular|Temporal)&(Temporal|Frontal|Supp_Motor_Area) | (Default_mode|Central_executive)&(Default_mode|Salience) |
| Edge (Functional connectivity) | Pheno718 | Net100_Pair12_33 | (Frontal|Cerebellum)&(Temporal|Frontal|Supp_Motor_Area) | (Central_executive|Default_mode)&(Default_mode|Salience) |
| Edge (Functional connectivity) | Pheno719 | Net100_Pair13_33 | (Frontal_Sup)&(Temporal|Frontal|Supp_Motor_Area) | (Default_mode)&(Default_mode|Salience) |
| Edge (Functional connectivity) | Pheno720 | Net100_Pair14_33 | (Cuneus|Occipital)&(Temporal|Frontal|Supp_Motor_Area) | (Visual)&(Default_mode|Salience) |
| Edge (Functional connectivity) | Pheno721 | Net100_Pair15_33 | (Insula|Cingulate)&(Temporal|Frontal|Supp_Motor_Area) | (Salience|Default_mode)&(Default_mode|Salience) |
| Edge (Functional connectivity) | Pheno722 | Net100_Pair16_33 | (Occipital)&(Temporal|Frontal|Supp_Motor_Area) | (Visual)&(Default_mode|Salience) |
| Edge (Functional connectivity) | Pheno723 | Net100_Pair17_33 | (Cerebellum)&(Temporal|Frontal|Supp_Motor_Area) | (Subcortical-cerebellum)&(Default_mode|Salience) |
| Edge (Functional connectivity) | Pheno724 | Net100_Pair18_33 | (Parietal)&(Temporal|Frontal|Supp_Motor_Area) | (Attention|Central_executive|Salience)&(Default_mode|Salience) |
| Edge (Functional connectivity) | Pheno725 | Net100_Pair19_33 | (Precuneus|Cuneus|Cingulate)&(Temporal|Frontal|Supp_Motor_Area) | (Default_mode|Central_executive)&(Default_mode|Salience) |
| Edge (Functional connectivity) | Pheno726 | Net100_Pair20_33 | (Postcentral|Precentral)&(Temporal|Frontal|Supp_Motor_Area) | (Motor|Attention)&(Default_mode|Salience) |
| Edge (Functional connectivity) | Pheno727 | Net100_Pair21_33 | (Frontal_Sup)&(Temporal|Frontal|Supp_Motor_Area) | (Default_mode|Central_executive)&(Default_mode|Salience) |
| Edge (Functional connectivity) | Pheno728 | Net100_Pair22_33 | (Temporal_Sup)&(Temporal|Frontal|Supp_Motor_Area) | (Default_mode|Motor)&(Default_mode|Salience) |
| Edge (Functional connectivity) | Pheno729 | Net100_Pair23_33 | (Cerebellum)&(Temporal|Frontal|Supp_Motor_Area) | (Subcortical-cerebellum)&(Default_mode|Salience) |
| Edge (Functional connectivity) | Pheno730 | Net100_Pair24_33 | (Parietal)&(Temporal|Frontal|Supp_Motor_Area) | (Central_executive|Attention)&(Default_mode|Salience) |
| Edge (Functional connectivity) | Pheno731 | Net100_Pair25_33 | (Frontal|Precentral)&(Temporal|Frontal|Supp_Motor_Area) | (Central_executive)&(Default_mode|Salience) |
| Edge (Functional connectivity) | Pheno732 | Net100_Pair26_33 | (Parietal|Frontal)&(Temporal|Frontal|Supp_Motor_Area) | (Attention|Central_executive)&(Default_mode|Salience) |
| Edge (Functional connectivity) | Pheno733 | Net100_Pair27_33 | (Precentral|Frontal|Supp_Motor_Area)&(Temporal|Frontal|Supp_Motor_Area) | (Attention|Salience|Motor)&(Default_mode|Salience) |
| Edge (Functional connectivity) | Pheno734 | Net100_Pair28_33 | (Supp_Motor_Area|Frontal)&(Temporal|Frontal|Supp_Motor_Area) | (Salience|Default_mode)&(Default_mode|Salience) |
| Edge (Functional connectivity) | Pheno735 | Net100_Pair29_33 | (Parietal)&(Temporal|Frontal|Supp_Motor_Area) | (Central_executive|Salience)&(Default_mode|Salience) |
| Edge (Functional connectivity) | Pheno736 | Net100_Pair30_33 | (Paracentral)&(Temporal|Frontal|Supp_Motor_Area) | (Motor)&(Default_mode|Salience) |
| Edge (Functional connectivity) | Pheno737 | Net100_Pair31_33 | (Frontal)&(Temporal|Frontal|Supp_Motor_Area) | (Central_executive)&(Default_mode|Salience) |
| Edge (Functional connectivity) | Pheno738 | Net100_Pair32_33 | (Postcentral|Precentral)&(Temporal|Frontal|Supp_Motor_Area) | (Motor|Attention)&(Default_mode|Salience) |
| Edge (Functional connectivity) | Pheno739 | Net100_Pair1_34 | (Calcarine|Lingual|Cuneus)&(Parietal|Postcentral|Precuneus) | (Visual)&(Attention) |
| Edge (Functional connectivity) | Pheno740 | Net100_Pair2_34 | (RolandicOper|SupraMarginal|Insula)&(Parietal|Postcentral|Precuneus) | (Salience|Motor)&(Attention) |
| Edge (Functional connectivity) | Pheno741 | Net100_Pair3_34 | (Lingual|Fusiform)&(Parietal|Postcentral|Precuneus) | (Visual)&(Attention) |
| Edge (Functional connectivity) | Pheno742 | Net100_Pair4_34 | (Occipital)&(Parietal|Postcentral|Precuneus) | (Attention|Visual)&(Attention) |
| Edge (Functional connectivity) | Pheno743 | Net100_Pair5_34 | (Precuneus|Angular|Cingulate)&(Parietal|Postcentral|Precuneus) | (Default_mode|Central_executive)&(Attention) |
| Edge (Functional connectivity) | Pheno744 | Net100_Pair6_34 | (Postcentral|Precentral)&(Parietal|Postcentral|Precuneus) | (Motor)&(Attention) |
| Edge (Functional connectivity) | Pheno745 | Net100_Pair7_34 | (Frontal|Cingulate)&(Parietal|Postcentral|Precuneus) | (Default_mode|Limbic)&(Attention) |
| Edge (Functional connectivity) | Pheno746 | Net100_Pair8_34 | (Calcarine|Lingual)&(Parietal|Postcentral|Precuneus) | (Visual)&(Attention) |
| Edge (Functional connectivity) | Pheno747 | Net100_Pair9_34 | (Temporal)&(Parietal|Postcentral|Precuneus) | (Default_mode)&(Attention) |
| Edge (Functional connectivity) | Pheno748 | Net100_Pair10_34 | (OccipitalPrecuneus)&(Parietal|Postcentral|Precuneus) | (Default_mode|Central_executive)&(Attention) |
| Edge (Functional connectivity) | Pheno749 | Net100_Pair11_34 | (Angular|Temporal)&(Parietal|Postcentral|Precuneus) | (Default_mode|Central_executive)&(Attention) |
| Edge (Functional connectivity) | Pheno750 | Net100_Pair12_34 | (Frontal|Cerebellum)&(Parietal|Postcentral|Precuneus) | (Central_executive|Default_mode)&(Attention) |
| Edge (Functional connectivity) | Pheno751 | Net100_Pair13_34 | (Frontal_Sup)&(Parietal|Postcentral|Precuneus) | (Default_mode)&(Attention) |
| Edge (Functional connectivity) | Pheno752 | Net100_Pair14_34 | (Cuneus|Occipital)&(Parietal|Postcentral|Precuneus) | (Visual)&(Attention) |
| Edge (Functional connectivity) | Pheno753 | Net100_Pair15_34 | (Insula|Cingulate)&(Parietal|Postcentral|Precuneus) | (Salience|Default_mode)&(Attention) |
| Edge (Functional connectivity) | Pheno754 | Net100_Pair16_34 | (Occipital)&(Parietal|Postcentral|Precuneus) | (Visual)&(Attention) |
| Edge (Functional connectivity) | Pheno755 | Net100_Pair17_34 | (Cerebellum)&(Parietal|Postcentral|Precuneus) | (Subcortical-cerebellum)&(Attention) |
| Edge (Functional connectivity) | Pheno756 | Net100_Pair18_34 | (Parietal)&(Parietal|Postcentral|Precuneus) | (Attention|Central_executive|Salience)&(Attention) |
| Edge (Functional connectivity) | Pheno757 | Net100_Pair19_34 | (Precuneus|Cuneus|Cingulate)&(Parietal|Postcentral|Precuneus) | (Default_mode|Central_executive)&(Attention) |
| Edge (Functional connectivity) | Pheno758 | Net100_Pair20_34 | (Postcentral|Precentral)&(Parietal|Postcentral|Precuneus) | (Motor|Attention)&(Attention) |
| Edge (Functional connectivity) | Pheno759 | Net100_Pair21_34 | (Frontal_Sup)&(Parietal|Postcentral|Precuneus) | (Default_mode|Central_executive)&(Attention) |
| Edge (Functional connectivity) | Pheno760 | Net100_Pair22_34 | (Temporal_Sup)&(Parietal|Postcentral|Precuneus) | (Default_mode|Motor)&(Attention) |
| Edge (Functional connectivity) | Pheno761 | Net100_Pair23_34 | (Cerebellum)&(Parietal|Postcentral|Precuneus) | (Subcortical-cerebellum)&(Attention) |
| Edge (Functional connectivity) | Pheno762 | Net100_Pair24_34 | (Parietal)&(Parietal|Postcentral|Precuneus) | (Central_executive|Attention)&(Attention) |
| Edge (Functional connectivity) | Pheno763 | Net100_Pair25_34 | (Frontal|Precentral)&(Parietal|Postcentral|Precuneus) | (Central_executive)&(Attention) |
| Edge (Functional connectivity) | Pheno764 | Net100_Pair26_34 | (Parietal|Frontal)&(Parietal|Postcentral|Precuneus) | (Attention|Central_executive)&(Attention) |
| Edge (Functional connectivity) | Pheno765 | Net100_Pair27_34 | (Precentral|Frontal|Supp_Motor_Area)&(Parietal|Postcentral|Precuneus) | (Attention|Salience|Motor)&(Attention) |
| Edge (Functional connectivity) | Pheno766 | Net100_Pair28_34 | (Supp_Motor_Area|Frontal)&(Parietal|Postcentral|Precuneus) | (Salience|Default_mode)&(Attention) |
| Edge (Functional connectivity) | Pheno767 | Net100_Pair29_34 | (Parietal)&(Parietal|Postcentral|Precuneus) | (Central_executive|Salience)&(Attention) |
| Edge (Functional connectivity) | Pheno768 | Net100_Pair30_34 | (Paracentral)&(Parietal|Postcentral|Precuneus) | (Motor)&(Attention) |
| Edge (Functional connectivity) | Pheno769 | Net100_Pair31_34 | (Frontal)&(Parietal|Postcentral|Precuneus) | (Central_executive)&(Attention) |
| Edge (Functional connectivity) | Pheno770 | Net100_Pair32_34 | (Postcentral|Precentral)&(Parietal|Postcentral|Precuneus) | (Motor|Attention)&(Attention) |
| Edge (Functional connectivity) | Pheno771 | Net100_Pair33_34 | (Temporal|Frontal|Supp_Motor_Area)&(Parietal|Postcentral|Precuneus) | (Default_mode|Salience)&(Attention) |
| Edge (Functional connectivity) | Pheno772 | Net100_Pair1_35 | (Calcarine|Lingual|Cuneus)&(Postcentral|Precentral) | (Visual)&(Motor) |
| Edge (Functional connectivity) | Pheno773 | Net100_Pair2_35 | (RolandicOper|SupraMarginal|Insula)&(Postcentral|Precentral) | (Salience|Motor)&(Motor) |
| Edge (Functional connectivity) | Pheno774 | Net100_Pair3_35 | (Lingual|Fusiform)&(Postcentral|Precentral) | (Visual)&(Motor) |
| Edge (Functional connectivity) | Pheno775 | Net100_Pair4_35 | (Occipital)&(Postcentral|Precentral) | (Attention|Visual)&(Motor) |
| Edge (Functional connectivity) | Pheno776 | Net100_Pair5_35 | (Precuneus|Angular|Cingulate)&(Postcentral|Precentral) | (Default_mode|Central_executive)&(Motor) |
| Edge (Functional connectivity) | Pheno777 | Net100_Pair6_35 | (Postcentral|Precentral)&(Postcentral|Precentral) | (Motor)&(Motor) |
| Edge (Functional connectivity) | Pheno778 | Net100_Pair7_35 | (Frontal|Cingulate)&(Postcentral|Precentral) | (Default_mode|Limbic)&(Motor) |
| Edge (Functional connectivity) | Pheno779 | Net100_Pair8_35 | (Calcarine|Lingual)&(Postcentral|Precentral) | (Visual)&(Motor) |
| Edge (Functional connectivity) | Pheno780 | Net100_Pair9_35 | (Temporal)&(Postcentral|Precentral) | (Default_mode)&(Motor) |
| Edge (Functional connectivity) | Pheno781 | Net100_Pair10_35 | (OccipitalPrecuneus)&(Postcentral|Precentral) | (Default_mode|Central_executive)&(Motor) |
| Edge (Functional connectivity) | Pheno782 | Net100_Pair11_35 | (Angular|Temporal)&(Postcentral|Precentral) | (Default_mode|Central_executive)&(Motor) |
| Edge (Functional connectivity) | Pheno783 | Net100_Pair12_35 | (Frontal|Cerebellum)&(Postcentral|Precentral) | (Central_executive|Default_mode)&(Motor) |
| Edge (Functional connectivity) | Pheno784 | Net100_Pair13_35 | (Frontal_Sup)&(Postcentral|Precentral) | (Default_mode)&(Motor) |
| Edge (Functional connectivity) | Pheno785 | Net100_Pair14_35 | (Cuneus|Occipital)&(Postcentral|Precentral) | (Visual)&(Motor) |
| Edge (Functional connectivity) | Pheno786 | Net100_Pair15_35 | (Insula|Cingulate)&(Postcentral|Precentral) | (Salience|Default_mode)&(Motor) |
| Edge (Functional connectivity) | Pheno787 | Net100_Pair16_35 | (Occipital)&(Postcentral|Precentral) | (Visual)&(Motor) |
| Edge (Functional connectivity) | Pheno788 | Net100_Pair17_35 | (Cerebellum)&(Postcentral|Precentral) | (Subcortical-cerebellum)&(Motor) |
| Edge (Functional connectivity) | Pheno789 | Net100_Pair18_35 | (Parietal)&(Postcentral|Precentral) | (Attention|Central_executive|Salience)&(Motor) |
| Edge (Functional connectivity) | Pheno790 | Net100_Pair19_35 | (Precuneus|Cuneus|Cingulate)&(Postcentral|Precentral) | (Default_mode|Central_executive)&(Motor) |
| Edge (Functional connectivity) | Pheno791 | Net100_Pair20_35 | (Postcentral|Precentral)&(Postcentral|Precentral) | (Motor|Attention)&(Motor) |
| Edge (Functional connectivity) | Pheno792 | Net100_Pair21_35 | (Frontal_Sup)&(Postcentral|Precentral) | (Default_mode|Central_executive)&(Motor) |
| Edge (Functional connectivity) | Pheno793 | Net100_Pair22_35 | (Temporal_Sup)&(Postcentral|Precentral) | (Default_mode|Motor)&(Motor) |
| Edge (Functional connectivity) | Pheno794 | Net100_Pair23_35 | (Cerebellum)&(Postcentral|Precentral) | (Subcortical-cerebellum)&(Motor) |
| Edge (Functional connectivity) | Pheno795 | Net100_Pair24_35 | (Parietal)&(Postcentral|Precentral) | (Central_executive|Attention)&(Motor) |
| Edge (Functional connectivity) | Pheno796 | Net100_Pair25_35 | (Frontal|Precentral)&(Postcentral|Precentral) | (Central_executive)&(Motor) |
| Edge (Functional connectivity) | Pheno797 | Net100_Pair26_35 | (Parietal|Frontal)&(Postcentral|Precentral) | (Attention|Central_executive)&(Motor) |
| Edge (Functional connectivity) | Pheno798 | Net100_Pair27_35 | (Precentral|Frontal|Supp_Motor_Area)&(Postcentral|Precentral) | (Attention|Salience|Motor)&(Motor) |
| Edge (Functional connectivity) | Pheno799 | Net100_Pair28_35 | (Supp_Motor_Area|Frontal)&(Postcentral|Precentral) | (Salience|Default_mode)&(Motor) |
| Edge (Functional connectivity) | Pheno800 | Net100_Pair29_35 | (Parietal)&(Postcentral|Precentral) | (Central_executive|Salience)&(Motor) |
| Edge (Functional connectivity) | Pheno801 | Net100_Pair30_35 | (Paracentral)&(Postcentral|Precentral) | (Motor)&(Motor) |
| Edge (Functional connectivity) | Pheno802 | Net100_Pair31_35 | (Frontal)&(Postcentral|Precentral) | (Central_executive)&(Motor) |
| Edge (Functional connectivity) | Pheno803 | Net100_Pair32_35 | (Postcentral|Precentral)&(Postcentral|Precentral) | (Motor|Attention)&(Motor) |
| Edge (Functional connectivity) | Pheno804 | Net100_Pair33_35 | (Temporal|Frontal|Supp_Motor_Area)&(Postcentral|Precentral) | (Default_mode|Salience)&(Motor) |
| Edge (Functional connectivity) | Pheno805 | Net100_Pair34_35 | (Parietal|Postcentral|Precuneus)&(Postcentral|Precentral) | (Attention)&(Motor) |
| Edge (Functional connectivity) | Pheno806 | Net100_Pair1_36 | (Calcarine|Lingual|Cuneus)&(Precuneus) | (Visual)&(Default_mode|Central_executive) |
| Edge (Functional connectivity) | Pheno807 | Net100_Pair2_36 | (RolandicOper|SupraMarginal|Insula)&(Precuneus) | (Salience|Motor)&(Default_mode|Central_executive) |
| Edge (Functional connectivity) | Pheno808 | Net100_Pair3_36 | (Lingual|Fusiform)&(Precuneus) | (Visual)&(Default_mode|Central_executive) |
| Edge (Functional connectivity) | Pheno809 | Net100_Pair4_36 | (Occipital)&(Precuneus) | (Attention|Visual)&(Default_mode|Central_executive) |
| Edge (Functional connectivity) | Pheno810 | Net100_Pair5_36 | (Precuneus|Angular|Cingulate)&(Precuneus) | (Default_mode|Central_executive)&(Default_mode|Central_executive) |
| Edge (Functional connectivity) | Pheno811 | Net100_Pair6_36 | (Postcentral|Precentral)&(Precuneus) | (Motor)&(Default_mode|Central_executive) |
| Edge (Functional connectivity) | Pheno812 | Net100_Pair7_36 | (Frontal|Cingulate)&(Precuneus) | (Default_mode|Limbic)&(Default_mode|Central_executive) |
| Edge (Functional connectivity) | Pheno813 | Net100_Pair8_36 | (Calcarine|Lingual)&(Precuneus) | (Visual)&(Default_mode|Central_executive) |
| Edge (Functional connectivity) | Pheno814 | Net100_Pair9_36 | (Temporal)&(Precuneus) | (Default_mode)&(Default_mode|Central_executive) |
| Edge (Functional connectivity) | Pheno815 | Net100_Pair10_36 | (OccipitalPrecuneus)&(Precuneus) | (Default_mode|Central_executive)&(Default_mode|Central_executive) |
| Edge (Functional connectivity) | Pheno816 | Net100_Pair11_36 | (Angular|Temporal)&(Precuneus) | (Default_mode|Central_executive)&(Default_mode|Central_executive) |
| Edge (Functional connectivity) | Pheno817 | Net100_Pair12_36 | (Frontal|Cerebellum)&(Precuneus) | (Central_executive|Default_mode)&(Default_mode|Central_executive) |
| Edge (Functional connectivity) | Pheno818 | Net100_Pair13_36 | (Frontal_Sup)&(Precuneus) | (Default_mode)&(Default_mode|Central_executive) |
| Edge (Functional connectivity) | Pheno819 | Net100_Pair14_36 | (Cuneus|Occipital)&(Precuneus) | (Visual)&(Default_mode|Central_executive) |
| Edge (Functional connectivity) | Pheno820 | Net100_Pair15_36 | (Insula|Cingulate)&(Precuneus) | (Salience|Default_mode)&(Default_mode|Central_executive) |
| Edge (Functional connectivity) | Pheno821 | Net100_Pair16_36 | (Occipital)&(Precuneus) | (Visual)&(Default_mode|Central_executive) |
| Edge (Functional connectivity) | Pheno822 | Net100_Pair17_36 | (Cerebellum)&(Precuneus) | (Subcortical-cerebellum)&(Default_mode|Central_executive) |
| Edge (Functional connectivity) | Pheno823 | Net100_Pair18_36 | (Parietal)&(Precuneus) | (Attention|Central_executive|Salience)&(Default_mode|Central_executive) |
| Edge (Functional connectivity) | Pheno824 | Net100_Pair19_36 | (Precuneus|Cuneus|Cingulate)&(Precuneus) | (Default_mode|Central_executive)&(Default_mode|Central_executive) |
| Edge (Functional connectivity) | Pheno825 | Net100_Pair20_36 | (Postcentral|Precentral)&(Precuneus) | (Motor|Attention)&(Default_mode|Central_executive) |
| Edge (Functional connectivity) | Pheno826 | Net100_Pair21_36 | (Frontal_Sup)&(Precuneus) | (Default_mode|Central_executive)&(Default_mode|Central_executive) |
| Edge (Functional connectivity) | Pheno827 | Net100_Pair22_36 | (Temporal_Sup)&(Precuneus) | (Default_mode|Motor)&(Default_mode|Central_executive) |
| Edge (Functional connectivity) | Pheno828 | Net100_Pair23_36 | (Cerebellum)&(Precuneus) | (Subcortical-cerebellum)&(Default_mode|Central_executive) |
| Edge (Functional connectivity) | Pheno829 | Net100_Pair24_36 | (Parietal)&(Precuneus) | (Central_executive|Attention)&(Default_mode|Central_executive) |
| Edge (Functional connectivity) | Pheno830 | Net100_Pair25_36 | (Frontal|Precentral)&(Precuneus) | (Central_executive)&(Default_mode|Central_executive) |
| Edge (Functional connectivity) | Pheno831 | Net100_Pair26_36 | (Parietal|Frontal)&(Precuneus) | (Attention|Central_executive)&(Default_mode|Central_executive) |
| Edge (Functional connectivity) | Pheno832 | Net100_Pair27_36 | (Precentral|Frontal|Supp_Motor_Area)&(Precuneus) | (Attention|Salience|Motor)&(Default_mode|Central_executive) |
| Edge (Functional connectivity) | Pheno833 | Net100_Pair28_36 | (Supp_Motor_Area|Frontal)&(Precuneus) | (Salience|Default_mode)&(Default_mode|Central_executive) |
| Edge (Functional connectivity) | Pheno834 | Net100_Pair29_36 | (Parietal)&(Precuneus) | (Central_executive|Salience)&(Default_mode|Central_executive) |
| Edge (Functional connectivity) | Pheno835 | Net100_Pair30_36 | (Paracentral)&(Precuneus) | (Motor)&(Default_mode|Central_executive) |
| Edge (Functional connectivity) | Pheno836 | Net100_Pair31_36 | (Frontal)&(Precuneus) | (Central_executive)&(Default_mode|Central_executive) |
| Edge (Functional connectivity) | Pheno837 | Net100_Pair32_36 | (Postcentral|Precentral)&(Precuneus) | (Motor|Attention)&(Default_mode|Central_executive) |
| Edge (Functional connectivity) | Pheno838 | Net100_Pair33_36 | (Temporal|Frontal|Supp_Motor_Area)&(Precuneus) | (Default_mode|Salience)&(Default_mode|Central_executive) |
| Edge (Functional connectivity) | Pheno839 | Net100_Pair34_36 | (Parietal|Postcentral|Precuneus)&(Precuneus) | (Attention)&(Default_mode|Central_executive) |
| Edge (Functional connectivity) | Pheno840 | Net100_Pair35_36 | (Postcentral|Precentral)&(Precuneus) | (Motor)&(Default_mode|Central_executive) |
| Edge (Functional connectivity) | Pheno841 | Net100_Pair1_37 | (Calcarine|Lingual|Cuneus)&(Frontal) | (Visual)&(Central_executive|Salience) |
| Edge (Functional connectivity) | Pheno842 | Net100_Pair2_37 | (RolandicOper|SupraMarginal|Insula)&(Frontal) | (Salience|Motor)&(Central_executive|Salience) |
| Edge (Functional connectivity) | Pheno843 | Net100_Pair3_37 | (Lingual|Fusiform)&(Frontal) | (Visual)&(Central_executive|Salience) |
| Edge (Functional connectivity) | Pheno844 | Net100_Pair4_37 | (Occipital)&(Frontal) | (Attention|Visual)&(Central_executive|Salience) |
| Edge (Functional connectivity) | Pheno845 | Net100_Pair5_37 | (Precuneus|Angular|Cingulate)&(Frontal) | (Default_mode|Central_executive)&(Central_executive|Salience) |
| Edge (Functional connectivity) | Pheno846 | Net100_Pair6_37 | (Postcentral|Precentral)&(Frontal) | (Motor)&(Central_executive|Salience) |
| Edge (Functional connectivity) | Pheno847 | Net100_Pair7_37 | (Frontal|Cingulate)&(Frontal) | (Default_mode|Limbic)&(Central_executive|Salience) |
| Edge (Functional connectivity) | Pheno848 | Net100_Pair8_37 | (Calcarine|Lingual)&(Frontal) | (Visual)&(Central_executive|Salience) |
| Edge (Functional connectivity) | Pheno849 | Net100_Pair9_37 | (Temporal)&(Frontal) | (Default_mode)&(Central_executive|Salience) |
| Edge (Functional connectivity) | Pheno850 | Net100_Pair10_37 | (OccipitalPrecuneus)&(Frontal) | (Default_mode|Central_executive)&(Central_executive|Salience) |
| Edge (Functional connectivity) | Pheno851 | Net100_Pair11_37 | (Angular|Temporal)&(Frontal) | (Default_mode|Central_executive)&(Central_executive|Salience) |
| Edge (Functional connectivity) | Pheno852 | Net100_Pair12_37 | (Frontal|Cerebellum)&(Frontal) | (Central_executive|Default_mode)&(Central_executive|Salience) |
| Edge (Functional connectivity) | Pheno853 | Net100_Pair13_37 | (Frontal_Sup)&(Frontal) | (Default_mode)&(Central_executive|Salience) |
| Edge (Functional connectivity) | Pheno854 | Net100_Pair14_37 | (Cuneus|Occipital)&(Frontal) | (Visual)&(Central_executive|Salience) |
| Edge (Functional connectivity) | Pheno855 | Net100_Pair15_37 | (Insula|Cingulate)&(Frontal) | (Salience|Default_mode)&(Central_executive|Salience) |
| Edge (Functional connectivity) | Pheno856 | Net100_Pair16_37 | (Occipital)&(Frontal) | (Visual)&(Central_executive|Salience) |
| Edge (Functional connectivity) | Pheno857 | Net100_Pair17_37 | (Cerebellum)&(Frontal) | (Subcortical-cerebellum)&(Central_executive|Salience) |
| Edge (Functional connectivity) | Pheno858 | Net100_Pair18_37 | (Parietal)&(Frontal) | (Attention|Central_executive|Salience)&(Central_executive|Salience) |
| Edge (Functional connectivity) | Pheno859 | Net100_Pair19_37 | (Precuneus|Cuneus|Cingulate)&(Frontal) | (Default_mode|Central_executive)&(Central_executive|Salience) |
| Edge (Functional connectivity) | Pheno860 | Net100_Pair20_37 | (Postcentral|Precentral)&(Frontal) | (Motor|Attention)&(Central_executive|Salience) |
| Edge (Functional connectivity) | Pheno861 | Net100_Pair21_37 | (Frontal_Sup)&(Frontal) | (Default_mode|Central_executive)&(Central_executive|Salience) |
| Edge (Functional connectivity) | Pheno862 | Net100_Pair22_37 | (Temporal_Sup)&(Frontal) | (Default_mode|Motor)&(Central_executive|Salience) |
| Edge (Functional connectivity) | Pheno863 | Net100_Pair23_37 | (Cerebellum)&(Frontal) | (Subcortical-cerebellum)&(Central_executive|Salience) |
| Edge (Functional connectivity) | Pheno864 | Net100_Pair24_37 | (Parietal)&(Frontal) | (Central_executive|Attention)&(Central_executive|Salience) |
| Edge (Functional connectivity) | Pheno865 | Net100_Pair25_37 | (Frontal|Precentral)&(Frontal) | (Central_executive)&(Central_executive|Salience) |
| Edge (Functional connectivity) | Pheno866 | Net100_Pair26_37 | (Parietal|Frontal)&(Frontal) | (Attention|Central_executive)&(Central_executive|Salience) |
| Edge (Functional connectivity) | Pheno867 | Net100_Pair27_37 | (Precentral|Frontal|Supp_Motor_Area)&(Frontal) | (Attention|Salience|Motor)&(Central_executive|Salience) |
| Edge (Functional connectivity) | Pheno868 | Net100_Pair28_37 | (Supp_Motor_Area|Frontal)&(Frontal) | (Salience|Default_mode)&(Central_executive|Salience) |
| Edge (Functional connectivity) | Pheno869 | Net100_Pair29_37 | (Parietal)&(Frontal) | (Central_executive|Salience)&(Central_executive|Salience) |
| Edge (Functional connectivity) | Pheno870 | Net100_Pair30_37 | (Paracentral)&(Frontal) | (Motor)&(Central_executive|Salience) |
| Edge (Functional connectivity) | Pheno871 | Net100_Pair31_37 | (Frontal)&(Frontal) | (Central_executive)&(Central_executive|Salience) |
| Edge (Functional connectivity) | Pheno872 | Net100_Pair32_37 | (Postcentral|Precentral)&(Frontal) | (Motor|Attention)&(Central_executive|Salience) |
| Edge (Functional connectivity) | Pheno873 | Net100_Pair33_37 | (Temporal|Frontal|Supp_Motor_Area)&(Frontal) | (Default_mode|Salience)&(Central_executive|Salience) |
| Edge (Functional connectivity) | Pheno874 | Net100_Pair34_37 | (Parietal|Postcentral|Precuneus)&(Frontal) | (Attention)&(Central_executive|Salience) |
| Edge (Functional connectivity) | Pheno875 | Net100_Pair35_37 | (Postcentral|Precentral)&(Frontal) | (Motor)&(Central_executive|Salience) |
| Edge (Functional connectivity) | Pheno876 | Net100_Pair36_37 | (Precuneus)&(Frontal) | (Default_mode|Central_executive)&(Central_executive|Salience) |
| Edge (Functional connectivity) | Pheno877 | Net100_Pair1_38 | (Calcarine|Lingual|Cuneus)&(Subcortical) | (Visual)&(Subcortical-cerebellum) |
| Edge (Functional connectivity) | Pheno878 | Net100_Pair2_38 | (RolandicOper|SupraMarginal|Insula)&(Subcortical) | (Salience|Motor)&(Subcortical-cerebellum) |
| Edge (Functional connectivity) | Pheno879 | Net100_Pair3_38 | (Lingual|Fusiform)&(Subcortical) | (Visual)&(Subcortical-cerebellum) |
| Edge (Functional connectivity) | Pheno880 | Net100_Pair4_38 | (Occipital)&(Subcortical) | (Attention|Visual)&(Subcortical-cerebellum) |
| Edge (Functional connectivity) | Pheno881 | Net100_Pair5_38 | (Precuneus|Angular|Cingulate)&(Subcortical) | (Default_mode|Central_executive)&(Subcortical-cerebellum) |
| Edge (Functional connectivity) | Pheno882 | Net100_Pair6_38 | (Postcentral|Precentral)&(Subcortical) | (Motor)&(Subcortical-cerebellum) |
| Edge (Functional connectivity) | Pheno883 | Net100_Pair7_38 | (Frontal|Cingulate)&(Subcortical) | (Default_mode|Limbic)&(Subcortical-cerebellum) |
| Edge (Functional connectivity) | Pheno884 | Net100_Pair8_38 | (Calcarine|Lingual)&(Subcortical) | (Visual)&(Subcortical-cerebellum) |
| Edge (Functional connectivity) | Pheno885 | Net100_Pair9_38 | (Temporal)&(Subcortical) | (Default_mode)&(Subcortical-cerebellum) |
| Edge (Functional connectivity) | Pheno886 | Net100_Pair10_38 | (OccipitalPrecuneus)&(Subcortical) | (Default_mode|Central_executive)&(Subcortical-cerebellum) |
| Edge (Functional connectivity) | Pheno887 | Net100_Pair11_38 | (Angular|Temporal)&(Subcortical) | (Default_mode|Central_executive)&(Subcortical-cerebellum) |
| Edge (Functional connectivity) | Pheno888 | Net100_Pair12_38 | (Frontal|Cerebellum)&(Subcortical) | (Central_executive|Default_mode)&(Subcortical-cerebellum) |
| Edge (Functional connectivity) | Pheno889 | Net100_Pair13_38 | (Frontal_Sup)&(Subcortical) | (Default_mode)&(Subcortical-cerebellum) |
| Edge (Functional connectivity) | Pheno890 | Net100_Pair14_38 | (Cuneus|Occipital)&(Subcortical) | (Visual)&(Subcortical-cerebellum) |
| Edge (Functional connectivity) | Pheno891 | Net100_Pair15_38 | (Insula|Cingulate)&(Subcortical) | (Salience|Default_mode)&(Subcortical-cerebellum) |
| Edge (Functional connectivity) | Pheno892 | Net100_Pair16_38 | (Occipital)&(Subcortical) | (Visual)&(Subcortical-cerebellum) |
| Edge (Functional connectivity) | Pheno893 | Net100_Pair17_38 | (Cerebellum)&(Subcortical) | (Subcortical-cerebellum)&(Subcortical-cerebellum) |
| Edge (Functional connectivity) | Pheno894 | Net100_Pair18_38 | (Parietal)&(Subcortical) | (Attention|Central_executive|Salience)&(Subcortical-cerebellum) |
| Edge (Functional connectivity) | Pheno895 | Net100_Pair19_38 | (Precuneus|Cuneus|Cingulate)&(Subcortical) | (Default_mode|Central_executive)&(Subcortical-cerebellum) |
| Edge (Functional connectivity) | Pheno896 | Net100_Pair20_38 | (Postcentral|Precentral)&(Subcortical) | (Motor|Attention)&(Subcortical-cerebellum) |
| Edge (Functional connectivity) | Pheno897 | Net100_Pair21_38 | (Frontal_Sup)&(Subcortical) | (Default_mode|Central_executive)&(Subcortical-cerebellum) |
| Edge (Functional connectivity) | Pheno898 | Net100_Pair22_38 | (Temporal_Sup)&(Subcortical) | (Default_mode|Motor)&(Subcortical-cerebellum) |
| Edge (Functional connectivity) | Pheno899 | Net100_Pair23_38 | (Cerebellum)&(Subcortical) | (Subcortical-cerebellum)&(Subcortical-cerebellum) |
| Edge (Functional connectivity) | Pheno900 | Net100_Pair24_38 | (Parietal)&(Subcortical) | (Central_executive|Attention)&(Subcortical-cerebellum) |
| Edge (Functional connectivity) | Pheno901 | Net100_Pair25_38 | (Frontal|Precentral)&(Subcortical) | (Central_executive)&(Subcortical-cerebellum) |
| Edge (Functional connectivity) | Pheno902 | Net100_Pair26_38 | (Parietal|Frontal)&(Subcortical) | (Attention|Central_executive)&(Subcortical-cerebellum) |
| Edge (Functional connectivity) | Pheno903 | Net100_Pair27_38 | (Precentral|Frontal|Supp_Motor_Area)&(Subcortical) | (Attention|Salience|Motor)&(Subcortical-cerebellum) |
| Edge (Functional connectivity) | Pheno904 | Net100_Pair28_38 | (Supp_Motor_Area|Frontal)&(Subcortical) | (Salience|Default_mode)&(Subcortical-cerebellum) |
| Edge (Functional connectivity) | Pheno905 | Net100_Pair29_38 | (Parietal)&(Subcortical) | (Central_executive|Salience)&(Subcortical-cerebellum) |
| Edge (Functional connectivity) | Pheno906 | Net100_Pair30_38 | (Paracentral)&(Subcortical) | (Motor)&(Subcortical-cerebellum) |
| Edge (Functional connectivity) | Pheno907 | Net100_Pair31_38 | (Frontal)&(Subcortical) | (Central_executive)&(Subcortical-cerebellum) |
| Edge (Functional connectivity) | Pheno908 | Net100_Pair32_38 | (Postcentral|Precentral)&(Subcortical) | (Motor|Attention)&(Subcortical-cerebellum) |
| Edge (Functional connectivity) | Pheno909 | Net100_Pair33_38 | (Temporal|Frontal|Supp_Motor_Area)&(Subcortical) | (Default_mode|Salience)&(Subcortical-cerebellum) |
| Edge (Functional connectivity) | Pheno910 | Net100_Pair34_38 | (Parietal|Postcentral|Precuneus)&(Subcortical) | (Attention)&(Subcortical-cerebellum) |
| Edge (Functional connectivity) | Pheno911 | Net100_Pair35_38 | (Postcentral|Precentral)&(Subcortical) | (Motor)&(Subcortical-cerebellum) |
| Edge (Functional connectivity) | Pheno912 | Net100_Pair36_38 | (Precuneus)&(Subcortical) | (Default_mode|Central_executive)&(Subcortical-cerebellum) |
| Edge (Functional connectivity) | Pheno913 | Net100_Pair37_38 | (Frontal)&(Subcortical) | (Central_executive|Salience)&(Subcortical-cerebellum) |
| Edge (Functional connectivity) | Pheno914 | Net100_Pair1_39 | (Calcarine|Lingual|Cuneus)&(Precuneus|Parietal_Sup) | (Visual)&(Attention|Central_executive) |
| Edge (Functional connectivity) | Pheno915 | Net100_Pair2_39 | (RolandicOper|SupraMarginal|Insula)&(Precuneus|Parietal_Sup) | (Salience|Motor)&(Attention|Central_executive) |
| Edge (Functional connectivity) | Pheno916 | Net100_Pair3_39 | (Lingual|Fusiform)&(Precuneus|Parietal_Sup) | (Visual)&(Attention|Central_executive) |
| Edge (Functional connectivity) | Pheno917 | Net100_Pair4_39 | (Occipital)&(Precuneus|Parietal_Sup) | (Attention|Visual)&(Attention|Central_executive) |
| Edge (Functional connectivity) | Pheno918 | Net100_Pair5_39 | (Precuneus|Angular|Cingulate)&(Precuneus|Parietal_Sup) | (Default_mode|Central_executive)&(Attention|Central_executive) |
| Edge (Functional connectivity) | Pheno919 | Net100_Pair6_39 | (Postcentral|Precentral)&(Precuneus|Parietal_Sup) | (Motor)&(Attention|Central_executive) |
| Edge (Functional connectivity) | Pheno920 | Net100_Pair7_39 | (Frontal|Cingulate)&(Precuneus|Parietal_Sup) | (Default_mode|Limbic)&(Attention|Central_executive) |
| Edge (Functional connectivity) | Pheno921 | Net100_Pair8_39 | (Calcarine|Lingual)&(Precuneus|Parietal_Sup) | (Visual)&(Attention|Central_executive) |
| Edge (Functional connectivity) | Pheno922 | Net100_Pair9_39 | (Temporal)&(Precuneus|Parietal_Sup) | (Default_mode)&(Attention|Central_executive) |
| Edge (Functional connectivity) | Pheno923 | Net100_Pair10_39 | (OccipitalPrecuneus)&(Precuneus|Parietal_Sup) | (Default_mode|Central_executive)&(Attention|Central_executive) |
| Edge (Functional connectivity) | Pheno924 | Net100_Pair11_39 | (Angular|Temporal)&(Precuneus|Parietal_Sup) | (Default_mode|Central_executive)&(Attention|Central_executive) |
| Edge (Functional connectivity) | Pheno925 | Net100_Pair12_39 | (Frontal|Cerebellum)&(Precuneus|Parietal_Sup) | (Central_executive|Default_mode)&(Attention|Central_executive) |
| Edge (Functional connectivity) | Pheno926 | Net100_Pair13_39 | (Frontal_Sup)&(Precuneus|Parietal_Sup) | (Default_mode)&(Attention|Central_executive) |
| Edge (Functional connectivity) | Pheno927 | Net100_Pair14_39 | (Cuneus|Occipital)&(Precuneus|Parietal_Sup) | (Visual)&(Attention|Central_executive) |
| Edge (Functional connectivity) | Pheno928 | Net100_Pair15_39 | (Insula|Cingulate)&(Precuneus|Parietal_Sup) | (Salience|Default_mode)&(Attention|Central_executive) |
| Edge (Functional connectivity) | Pheno929 | Net100_Pair16_39 | (Occipital)&(Precuneus|Parietal_Sup) | (Visual)&(Attention|Central_executive) |
| Edge (Functional connectivity) | Pheno930 | Net100_Pair17_39 | (Cerebellum)&(Precuneus|Parietal_Sup) | (Subcortical-cerebellum)&(Attention|Central_executive) |
| Edge (Functional connectivity) | Pheno931 | Net100_Pair18_39 | (Parietal)&(Precuneus|Parietal_Sup) | (Attention|Central_executive|Salience)&(Attention|Central_executive) |
| Edge (Functional connectivity) | Pheno932 | Net100_Pair19_39 | (Precuneus|Cuneus|Cingulate)&(Precuneus|Parietal_Sup) | (Default_mode|Central_executive)&(Attention|Central_executive) |
| Edge (Functional connectivity) | Pheno933 | Net100_Pair20_39 | (Postcentral|Precentral)&(Precuneus|Parietal_Sup) | (Motor|Attention)&(Attention|Central_executive) |
| Edge (Functional connectivity) | Pheno934 | Net100_Pair21_39 | (Frontal_Sup)&(Precuneus|Parietal_Sup) | (Default_mode|Central_executive)&(Attention|Central_executive) |
| Edge (Functional connectivity) | Pheno935 | Net100_Pair22_39 | (Temporal_Sup)&(Precuneus|Parietal_Sup) | (Default_mode|Motor)&(Attention|Central_executive) |
| Edge (Functional connectivity) | Pheno936 | Net100_Pair23_39 | (Cerebellum)&(Precuneus|Parietal_Sup) | (Subcortical-cerebellum)&(Attention|Central_executive) |
| Edge (Functional connectivity) | Pheno937 | Net100_Pair24_39 | (Parietal)&(Precuneus|Parietal_Sup) | (Central_executive|Attention)&(Attention|Central_executive) |
| Edge (Functional connectivity) | Pheno938 | Net100_Pair25_39 | (Frontal|Precentral)&(Precuneus|Parietal_Sup) | (Central_executive)&(Attention|Central_executive) |
| Edge (Functional connectivity) | Pheno939 | Net100_Pair26_39 | (Parietal|Frontal)&(Precuneus|Parietal_Sup) | (Attention|Central_executive)&(Attention|Central_executive) |
| Edge (Functional connectivity) | Pheno940 | Net100_Pair27_39 | (Precentral|Frontal|Supp_Motor_Area)&(Precuneus|Parietal_Sup) | (Attention|Salience|Motor)&(Attention|Central_executive) |
| Edge (Functional connectivity) | Pheno941 | Net100_Pair28_39 | (Supp_Motor_Area|Frontal)&(Precuneus|Parietal_Sup) | (Salience|Default_mode)&(Attention|Central_executive) |
| Edge (Functional connectivity) | Pheno942 | Net100_Pair29_39 | (Parietal)&(Precuneus|Parietal_Sup) | (Central_executive|Salience)&(Attention|Central_executive) |
| Edge (Functional connectivity) | Pheno943 | Net100_Pair30_39 | (Paracentral)&(Precuneus|Parietal_Sup) | (Motor)&(Attention|Central_executive) |
| Edge (Functional connectivity) | Pheno944 | Net100_Pair31_39 | (Frontal)&(Precuneus|Parietal_Sup) | (Central_executive)&(Attention|Central_executive) |
| Edge (Functional connectivity) | Pheno945 | Net100_Pair32_39 | (Postcentral|Precentral)&(Precuneus|Parietal_Sup) | (Motor|Attention)&(Attention|Central_executive) |
| Edge (Functional connectivity) | Pheno946 | Net100_Pair33_39 | (Temporal|Frontal|Supp_Motor_Area)&(Precuneus|Parietal_Sup) | (Default_mode|Salience)&(Attention|Central_executive) |
| Edge (Functional connectivity) | Pheno947 | Net100_Pair34_39 | (Parietal|Postcentral|Precuneus)&(Precuneus|Parietal_Sup) | (Attention)&(Attention|Central_executive) |
| Edge (Functional connectivity) | Pheno948 | Net100_Pair35_39 | (Postcentral|Precentral)&(Precuneus|Parietal_Sup) | (Motor)&(Attention|Central_executive) |
| Edge (Functional connectivity) | Pheno949 | Net100_Pair36_39 | (Precuneus)&(Precuneus|Parietal_Sup) | (Default_mode|Central_executive)&(Attention|Central_executive) |
| Edge (Functional connectivity) | Pheno950 | Net100_Pair37_39 | (Frontal)&(Precuneus|Parietal_Sup) | (Central_executive|Salience)&(Attention|Central_executive) |
| Edge (Functional connectivity) | Pheno951 | Net100_Pair38_39 | (Subcortical)&(Precuneus|Parietal_Sup) | (Subcortical-cerebellum)&(Attention|Central_executive) |
| Edge (Functional connectivity) | Pheno952 | Net100_Pair1_40 | (Calcarine|Lingual|Cuneus)&(Frontal) | (Visual)&(Central_executive) |
| Edge (Functional connectivity) | Pheno953 | Net100_Pair2_40 | (RolandicOper|SupraMarginal|Insula)&(Frontal) | (Salience|Motor)&(Central_executive) |
| Edge (Functional connectivity) | Pheno954 | Net100_Pair3_40 | (Lingual|Fusiform)&(Frontal) | (Visual)&(Central_executive) |
| Edge (Functional connectivity) | Pheno955 | Net100_Pair4_40 | (Occipital)&(Frontal) | (Attention|Visual)&(Central_executive) |
| Edge (Functional connectivity) | Pheno956 | Net100_Pair5_40 | (Precuneus|Angular|Cingulate)&(Frontal) | (Default_mode|Central_executive)&(Central_executive) |
| Edge (Functional connectivity) | Pheno957 | Net100_Pair6_40 | (Postcentral|Precentral)&(Frontal) | (Motor)&(Central_executive) |
| Edge (Functional connectivity) | Pheno958 | Net100_Pair7_40 | (Frontal|Cingulate)&(Frontal) | (Default_mode|Limbic)&(Central_executive) |
| Edge (Functional connectivity) | Pheno959 | Net100_Pair8_40 | (Calcarine|Lingual)&(Frontal) | (Visual)&(Central_executive) |
| Edge (Functional connectivity) | Pheno960 | Net100_Pair9_40 | (Temporal)&(Frontal) | (Default_mode)&(Central_executive) |
| Edge (Functional connectivity) | Pheno961 | Net100_Pair10_40 | (OccipitalPrecuneus)&(Frontal) | (Default_mode|Central_executive)&(Central_executive) |
| Edge (Functional connectivity) | Pheno962 | Net100_Pair11_40 | (Angular|Temporal)&(Frontal) | (Default_mode|Central_executive)&(Central_executive) |
| Edge (Functional connectivity) | Pheno963 | Net100_Pair12_40 | (Frontal|Cerebellum)&(Frontal) | (Central_executive|Default_mode)&(Central_executive) |
| Edge (Functional connectivity) | Pheno964 | Net100_Pair13_40 | (Frontal_Sup)&(Frontal) | (Default_mode)&(Central_executive) |
| Edge (Functional connectivity) | Pheno965 | Net100_Pair14_40 | (Cuneus|Occipital)&(Frontal) | (Visual)&(Central_executive) |
| Edge (Functional connectivity) | Pheno966 | Net100_Pair15_40 | (Insula|Cingulate)&(Frontal) | (Salience|Default_mode)&(Central_executive) |
| Edge (Functional connectivity) | Pheno967 | Net100_Pair16_40 | (Occipital)&(Frontal) | (Visual)&(Central_executive) |
| Edge (Functional connectivity) | Pheno968 | Net100_Pair17_40 | (Cerebellum)&(Frontal) | (Subcortical-cerebellum)&(Central_executive) |
| Edge (Functional connectivity) | Pheno969 | Net100_Pair18_40 | (Parietal)&(Frontal) | (Attention|Central_executive|Salience)&(Central_executive) |
| Edge (Functional connectivity) | Pheno970 | Net100_Pair19_40 | (Precuneus|Cuneus|Cingulate)&(Frontal) | (Default_mode|Central_executive)&(Central_executive) |
| Edge (Functional connectivity) | Pheno971 | Net100_Pair20_40 | (Postcentral|Precentral)&(Frontal) | (Motor|Attention)&(Central_executive) |
| Edge (Functional connectivity) | Pheno972 | Net100_Pair21_40 | (Frontal_Sup)&(Frontal) | (Default_mode|Central_executive)&(Central_executive) |
| Edge (Functional connectivity) | Pheno973 | Net100_Pair22_40 | (Temporal_Sup)&(Frontal) | (Default_mode|Motor)&(Central_executive) |
| Edge (Functional connectivity) | Pheno974 | Net100_Pair23_40 | (Cerebellum)&(Frontal) | (Subcortical-cerebellum)&(Central_executive) |
| Edge (Functional connectivity) | Pheno975 | Net100_Pair24_40 | (Parietal)&(Frontal) | (Central_executive|Attention)&(Central_executive) |
| Edge (Functional connectivity) | Pheno976 | Net100_Pair25_40 | (Frontal|Precentral)&(Frontal) | (Central_executive)&(Central_executive) |
| Edge (Functional connectivity) | Pheno977 | Net100_Pair26_40 | (Parietal|Frontal)&(Frontal) | (Attention|Central_executive)&(Central_executive) |
| Edge (Functional connectivity) | Pheno978 | Net100_Pair27_40 | (Precentral|Frontal|Supp_Motor_Area)&(Frontal) | (Attention|Salience|Motor)&(Central_executive) |
| Edge (Functional connectivity) | Pheno979 | Net100_Pair28_40 | (Supp_Motor_Area|Frontal)&(Frontal) | (Salience|Default_mode)&(Central_executive) |
| Edge (Functional connectivity) | Pheno980 | Net100_Pair29_40 | (Parietal)&(Frontal) | (Central_executive|Salience)&(Central_executive) |
| Edge (Functional connectivity) | Pheno981 | Net100_Pair30_40 | (Paracentral)&(Frontal) | (Motor)&(Central_executive) |
| Edge (Functional connectivity) | Pheno982 | Net100_Pair31_40 | (Frontal)&(Frontal) | (Central_executive)&(Central_executive) |
| Edge (Functional connectivity) | Pheno983 | Net100_Pair32_40 | (Postcentral|Precentral)&(Frontal) | (Motor|Attention)&(Central_executive) |
| Edge (Functional connectivity) | Pheno984 | Net100_Pair33_40 | (Temporal|Frontal|Supp_Motor_Area)&(Frontal) | (Default_mode|Salience)&(Central_executive) |
| Edge (Functional connectivity) | Pheno985 | Net100_Pair34_40 | (Parietal|Postcentral|Precuneus)&(Frontal) | (Attention)&(Central_executive) |
| Edge (Functional connectivity) | Pheno986 | Net100_Pair35_40 | (Postcentral|Precentral)&(Frontal) | (Motor)&(Central_executive) |
| Edge (Functional connectivity) | Pheno987 | Net100_Pair36_40 | (Precuneus)&(Frontal) | (Default_mode|Central_executive)&(Central_executive) |
| Edge (Functional connectivity) | Pheno988 | Net100_Pair37_40 | (Frontal)&(Frontal) | (Central_executive|Salience)&(Central_executive) |
| Edge (Functional connectivity) | Pheno989 | Net100_Pair38_40 | (Subcortical)&(Frontal) | (Subcortical-cerebellum)&(Central_executive) |
| Edge (Functional connectivity) | Pheno990 | Net100_Pair39_40 | (Precuneus|Parietal_Sup)&(Frontal) | (Attention|Central_executive)&(Central_executive) |
| Edge (Functional connectivity) | Pheno991 | Net100_Pair1_41 | (Calcarine|Lingual|Cuneus)&(Temporal|Occipital) | (Visual)&(Attention|Visual) |
| Edge (Functional connectivity) | Pheno992 | Net100_Pair2_41 | (RolandicOper|SupraMarginal|Insula)&(Temporal|Occipital) | (Salience|Motor)&(Attention|Visual) |
| Edge (Functional connectivity) | Pheno993 | Net100_Pair3_41 | (Lingual|Fusiform)&(Temporal|Occipital) | (Visual)&(Attention|Visual) |
| Edge (Functional connectivity) | Pheno994 | Net100_Pair4_41 | (Occipital)&(Temporal|Occipital) | (Attention|Visual)&(Attention|Visual) |
| Edge (Functional connectivity) | Pheno995 | Net100_Pair5_41 | (Precuneus|Angular|Cingulate)&(Temporal|Occipital) | (Default_mode|Central_executive)&(Attention|Visual) |
| Edge (Functional connectivity) | Pheno996 | Net100_Pair6_41 | (Postcentral|Precentral)&(Temporal|Occipital) | (Motor)&(Attention|Visual) |
| Edge (Functional connectivity) | Pheno997 | Net100_Pair7_41 | (Frontal|Cingulate)&(Temporal|Occipital) | (Default_mode|Limbic)&(Attention|Visual) |
| Edge (Functional connectivity) | Pheno998 | Net100_Pair8_41 | (Calcarine|Lingual)&(Temporal|Occipital) | (Visual)&(Attention|Visual) |
| Edge (Functional connectivity) | Pheno999 | Net100_Pair9_41 | (Temporal)&(Temporal|Occipital) | (Default_mode)&(Attention|Visual) |
| Edge (Functional connectivity) | Pheno1000 | Net100_Pair10_41 | (OccipitalPrecuneus)&(Temporal|Occipital) | (Default_mode|Central_executive)&(Attention|Visual) |
| Edge (Functional connectivity) | Pheno1001 | Net100_Pair11_41 | (Angular|Temporal)&(Temporal|Occipital) | (Default_mode|Central_executive)&(Attention|Visual) |
| Edge (Functional connectivity) | Pheno1002 | Net100_Pair12_41 | (Frontal|Cerebellum)&(Temporal|Occipital) | (Central_executive|Default_mode)&(Attention|Visual) |
| Edge (Functional connectivity) | Pheno1003 | Net100_Pair13_41 | (Frontal_Sup)&(Temporal|Occipital) | (Default_mode)&(Attention|Visual) |
| Edge (Functional connectivity) | Pheno1004 | Net100_Pair14_41 | (Cuneus|Occipital)&(Temporal|Occipital) | (Visual)&(Attention|Visual) |
| Edge (Functional connectivity) | Pheno1005 | Net100_Pair15_41 | (Insula|Cingulate)&(Temporal|Occipital) | (Salience|Default_mode)&(Attention|Visual) |
| Edge (Functional connectivity) | Pheno1006 | Net100_Pair16_41 | (Occipital)&(Temporal|Occipital) | (Visual)&(Attention|Visual) |
| Edge (Functional connectivity) | Pheno1007 | Net100_Pair17_41 | (Cerebellum)&(Temporal|Occipital) | (Subcortical-cerebellum)&(Attention|Visual) |
| Edge (Functional connectivity) | Pheno1008 | Net100_Pair18_41 | (Parietal)&(Temporal|Occipital) | (Attention|Central_executive|Salience)&(Attention|Visual) |
| Edge (Functional connectivity) | Pheno1009 | Net100_Pair19_41 | (Precuneus|Cuneus|Cingulate)&(Temporal|Occipital) | (Default_mode|Central_executive)&(Attention|Visual) |
| Edge (Functional connectivity) | Pheno1010 | Net100_Pair20_41 | (Postcentral|Precentral)&(Temporal|Occipital) | (Motor|Attention)&(Attention|Visual) |
| Edge (Functional connectivity) | Pheno1011 | Net100_Pair21_41 | (Frontal_Sup)&(Temporal|Occipital) | (Default_mode|Central_executive)&(Attention|Visual) |
| Edge (Functional connectivity) | Pheno1012 | Net100_Pair22_41 | (Temporal_Sup)&(Temporal|Occipital) | (Default_mode|Motor)&(Attention|Visual) |
| Edge (Functional connectivity) | Pheno1013 | Net100_Pair23_41 | (Cerebellum)&(Temporal|Occipital) | (Subcortical-cerebellum)&(Attention|Visual) |
| Edge (Functional connectivity) | Pheno1014 | Net100_Pair24_41 | (Parietal)&(Temporal|Occipital) | (Central_executive|Attention)&(Attention|Visual) |
| Edge (Functional connectivity) | Pheno1015 | Net100_Pair25_41 | (Frontal|Precentral)&(Temporal|Occipital) | (Central_executive)&(Attention|Visual) |
| Edge (Functional connectivity) | Pheno1016 | Net100_Pair26_41 | (Parietal|Frontal)&(Temporal|Occipital) | (Attention|Central_executive)&(Attention|Visual) |
| Edge (Functional connectivity) | Pheno1017 | Net100_Pair27_41 | (Precentral|Frontal|Supp_Motor_Area)&(Temporal|Occipital) | (Attention|Salience|Motor)&(Attention|Visual) |
| Edge (Functional connectivity) | Pheno1018 | Net100_Pair28_41 | (Supp_Motor_Area|Frontal)&(Temporal|Occipital) | (Salience|Default_mode)&(Attention|Visual) |
| Edge (Functional connectivity) | Pheno1019 | Net100_Pair29_41 | (Parietal)&(Temporal|Occipital) | (Central_executive|Salience)&(Attention|Visual) |
| Edge (Functional connectivity) | Pheno1020 | Net100_Pair30_41 | (Paracentral)&(Temporal|Occipital) | (Motor)&(Attention|Visual) |
| Edge (Functional connectivity) | Pheno1021 | Net100_Pair31_41 | (Frontal)&(Temporal|Occipital) | (Central_executive)&(Attention|Visual) |
| Edge (Functional connectivity) | Pheno1022 | Net100_Pair32_41 | (Postcentral|Precentral)&(Temporal|Occipital) | (Motor|Attention)&(Attention|Visual) |
| Edge (Functional connectivity) | Pheno1023 | Net100_Pair33_41 | (Temporal|Frontal|Supp_Motor_Area)&(Temporal|Occipital) | (Default_mode|Salience)&(Attention|Visual) |
| Edge (Functional connectivity) | Pheno1024 | Net100_Pair34_41 | (Parietal|Postcentral|Precuneus)&(Temporal|Occipital) | (Attention)&(Attention|Visual) |
| Edge (Functional connectivity) | Pheno1025 | Net100_Pair35_41 | (Postcentral|Precentral)&(Temporal|Occipital) | (Motor)&(Attention|Visual) |
| Edge (Functional connectivity) | Pheno1026 | Net100_Pair36_41 | (Precuneus)&(Temporal|Occipital) | (Default_mode|Central_executive)&(Attention|Visual) |
| Edge (Functional connectivity) | Pheno1027 | Net100_Pair37_41 | (Frontal)&(Temporal|Occipital) | (Central_executive|Salience)&(Attention|Visual) |
| Edge (Functional connectivity) | Pheno1028 | Net100_Pair38_41 | (Subcortical)&(Temporal|Occipital) | (Subcortical-cerebellum)&(Attention|Visual) |
| Edge (Functional connectivity) | Pheno1029 | Net100_Pair39_41 | (Precuneus|Parietal_Sup)&(Temporal|Occipital) | (Attention|Central_executive)&(Attention|Visual) |
| Edge (Functional connectivity) | Pheno1030 | Net100_Pair40_41 | (Frontal)&(Temporal|Occipital) | (Central_executive)&(Attention|Visual) |
| Edge (Functional connectivity) | Pheno1031 | Net100_Pair1_42 | (Calcarine|Lingual|Cuneus)&(Temporal|Occipital) | (Visual)&(Attention|Visual) |
| Edge (Functional connectivity) | Pheno1032 | Net100_Pair2_42 | (RolandicOper|SupraMarginal|Insula)&(Temporal|Occipital) | (Salience|Motor)&(Attention|Visual) |
| Edge (Functional connectivity) | Pheno1033 | Net100_Pair3_42 | (Lingual|Fusiform)&(Temporal|Occipital) | (Visual)&(Attention|Visual) |
| Edge (Functional connectivity) | Pheno1034 | Net100_Pair4_42 | (Occipital)&(Temporal|Occipital) | (Attention|Visual)&(Attention|Visual) |
| Edge (Functional connectivity) | Pheno1035 | Net100_Pair5_42 | (Precuneus|Angular|Cingulate)&(Temporal|Occipital) | (Default_mode|Central_executive)&(Attention|Visual) |
| Edge (Functional connectivity) | Pheno1036 | Net100_Pair6_42 | (Postcentral|Precentral)&(Temporal|Occipital) | (Motor)&(Attention|Visual) |
| Edge (Functional connectivity) | Pheno1037 | Net100_Pair7_42 | (Frontal|Cingulate)&(Temporal|Occipital) | (Default_mode|Limbic)&(Attention|Visual) |
| Edge (Functional connectivity) | Pheno1038 | Net100_Pair8_42 | (Calcarine|Lingual)&(Temporal|Occipital) | (Visual)&(Attention|Visual) |
| Edge (Functional connectivity) | Pheno1039 | Net100_Pair9_42 | (Temporal)&(Temporal|Occipital) | (Default_mode)&(Attention|Visual) |
| Edge (Functional connectivity) | Pheno1040 | Net100_Pair10_42 | (OccipitalPrecuneus)&(Temporal|Occipital) | (Default_mode|Central_executive)&(Attention|Visual) |
| Edge (Functional connectivity) | Pheno1041 | Net100_Pair11_42 | (Angular|Temporal)&(Temporal|Occipital) | (Default_mode|Central_executive)&(Attention|Visual) |
| Edge (Functional connectivity) | Pheno1042 | Net100_Pair12_42 | (Frontal|Cerebellum)&(Temporal|Occipital) | (Central_executive|Default_mode)&(Attention|Visual) |
| Edge (Functional connectivity) | Pheno1043 | Net100_Pair13_42 | (Frontal_Sup)&(Temporal|Occipital) | (Default_mode)&(Attention|Visual) |
| Edge (Functional connectivity) | Pheno1044 | Net100_Pair14_42 | (Cuneus|Occipital)&(Temporal|Occipital) | (Visual)&(Attention|Visual) |
| Edge (Functional connectivity) | Pheno1045 | Net100_Pair15_42 | (Insula|Cingulate)&(Temporal|Occipital) | (Salience|Default_mode)&(Attention|Visual) |
| Edge (Functional connectivity) | Pheno1046 | Net100_Pair16_42 | (Occipital)&(Temporal|Occipital) | (Visual)&(Attention|Visual) |
| Edge (Functional connectivity) | Pheno1047 | Net100_Pair17_42 | (Cerebellum)&(Temporal|Occipital) | (Subcortical-cerebellum)&(Attention|Visual) |
| Edge (Functional connectivity) | Pheno1048 | Net100_Pair18_42 | (Parietal)&(Temporal|Occipital) | (Attention|Central_executive|Salience)&(Attention|Visual) |
| Edge (Functional connectivity) | Pheno1049 | Net100_Pair19_42 | (Precuneus|Cuneus|Cingulate)&(Temporal|Occipital) | (Default_mode|Central_executive)&(Attention|Visual) |
| Edge (Functional connectivity) | Pheno1050 | Net100_Pair20_42 | (Postcentral|Precentral)&(Temporal|Occipital) | (Motor|Attention)&(Attention|Visual) |
| Edge (Functional connectivity) | Pheno1051 | Net100_Pair21_42 | (Frontal_Sup)&(Temporal|Occipital) | (Default_mode|Central_executive)&(Attention|Visual) |
| Edge (Functional connectivity) | Pheno1052 | Net100_Pair22_42 | (Temporal_Sup)&(Temporal|Occipital) | (Default_mode|Motor)&(Attention|Visual) |
| Edge (Functional connectivity) | Pheno1053 | Net100_Pair23_42 | (Cerebellum)&(Temporal|Occipital) | (Subcortical-cerebellum)&(Attention|Visual) |
| Edge (Functional connectivity) | Pheno1054 | Net100_Pair24_42 | (Parietal)&(Temporal|Occipital) | (Central_executive|Attention)&(Attention|Visual) |
| Edge (Functional connectivity) | Pheno1055 | Net100_Pair25_42 | (Frontal|Precentral)&(Temporal|Occipital) | (Central_executive)&(Attention|Visual) |
| Edge (Functional connectivity) | Pheno1056 | Net100_Pair26_42 | (Parietal|Frontal)&(Temporal|Occipital) | (Attention|Central_executive)&(Attention|Visual) |
| Edge (Functional connectivity) | Pheno1057 | Net100_Pair27_42 | (Precentral|Frontal|Supp_Motor_Area)&(Temporal|Occipital) | (Attention|Salience|Motor)&(Attention|Visual) |
| Edge (Functional connectivity) | Pheno1058 | Net100_Pair28_42 | (Supp_Motor_Area|Frontal)&(Temporal|Occipital) | (Salience|Default_mode)&(Attention|Visual) |
| Edge (Functional connectivity) | Pheno1059 | Net100_Pair29_42 | (Parietal)&(Temporal|Occipital) | (Central_executive|Salience)&(Attention|Visual) |
| Edge (Functional connectivity) | Pheno1060 | Net100_Pair30_42 | (Paracentral)&(Temporal|Occipital) | (Motor)&(Attention|Visual) |
| Edge (Functional connectivity) | Pheno1061 | Net100_Pair31_42 | (Frontal)&(Temporal|Occipital) | (Central_executive)&(Attention|Visual) |
| Edge (Functional connectivity) | Pheno1062 | Net100_Pair32_42 | (Postcentral|Precentral)&(Temporal|Occipital) | (Motor|Attention)&(Attention|Visual) |
| Edge (Functional connectivity) | Pheno1063 | Net100_Pair33_42 | (Temporal|Frontal|Supp_Motor_Area)&(Temporal|Occipital) | (Default_mode|Salience)&(Attention|Visual) |
| Edge (Functional connectivity) | Pheno1064 | Net100_Pair34_42 | (Parietal|Postcentral|Precuneus)&(Temporal|Occipital) | (Attention)&(Attention|Visual) |
| Edge (Functional connectivity) | Pheno1065 | Net100_Pair35_42 | (Postcentral|Precentral)&(Temporal|Occipital) | (Motor)&(Attention|Visual) |
| Edge (Functional connectivity) | Pheno1066 | Net100_Pair36_42 | (Precuneus)&(Temporal|Occipital) | (Default_mode|Central_executive)&(Attention|Visual) |
| Edge (Functional connectivity) | Pheno1067 | Net100_Pair37_42 | (Frontal)&(Temporal|Occipital) | (Central_executive|Salience)&(Attention|Visual) |
| Edge (Functional connectivity) | Pheno1068 | Net100_Pair38_42 | (Subcortical)&(Temporal|Occipital) | (Subcortical-cerebellum)&(Attention|Visual) |
| Edge (Functional connectivity) | Pheno1069 | Net100_Pair39_42 | (Precuneus|Parietal_Sup)&(Temporal|Occipital) | (Attention|Central_executive)&(Attention|Visual) |
| Edge (Functional connectivity) | Pheno1070 | Net100_Pair40_42 | (Frontal)&(Temporal|Occipital) | (Central_executive)&(Attention|Visual) |
| Edge (Functional connectivity) | Pheno1071 | Net100_Pair41_42 | (Temporal|Occipital)&(Temporal|Occipital) | (Attention|Visual)&(Attention|Visual) |
| Edge (Functional connectivity) | Pheno1072 | Net100_Pair1_43 | (Calcarine|Lingual|Cuneus)&(Temporal|Fusiform) | (Visual)&(Limbic|Default_mode) |
| Edge (Functional connectivity) | Pheno1073 | Net100_Pair2_43 | (RolandicOper|SupraMarginal|Insula)&(Temporal|Fusiform) | (Salience|Motor)&(Limbic|Default_mode) |
| Edge (Functional connectivity) | Pheno1074 | Net100_Pair3_43 | (Lingual|Fusiform)&(Temporal|Fusiform) | (Visual)&(Limbic|Default_mode) |
| Edge (Functional connectivity) | Pheno1075 | Net100_Pair4_43 | (Occipital)&(Temporal|Fusiform) | (Attention|Visual)&(Limbic|Default_mode) |
| Edge (Functional connectivity) | Pheno1076 | Net100_Pair5_43 | (Precuneus|Angular|Cingulate)&(Temporal|Fusiform) | (Default_mode|Central_executive)&(Limbic|Default_mode) |
| Edge (Functional connectivity) | Pheno1077 | Net100_Pair6_43 | (Postcentral|Precentral)&(Temporal|Fusiform) | (Motor)&(Limbic|Default_mode) |
| Edge (Functional connectivity) | Pheno1078 | Net100_Pair7_43 | (Frontal|Cingulate)&(Temporal|Fusiform) | (Default_mode|Limbic)&(Limbic|Default_mode) |
| Edge (Functional connectivity) | Pheno1079 | Net100_Pair8_43 | (Calcarine|Lingual)&(Temporal|Fusiform) | (Visual)&(Limbic|Default_mode) |
| Edge (Functional connectivity) | Pheno1080 | Net100_Pair9_43 | (Temporal)&(Temporal|Fusiform) | (Default_mode)&(Limbic|Default_mode) |
| Edge (Functional connectivity) | Pheno1081 | Net100_Pair10_43 | (OccipitalPrecuneus)&(Temporal|Fusiform) | (Default_mode|Central_executive)&(Limbic|Default_mode) |
| Edge (Functional connectivity) | Pheno1082 | Net100_Pair11_43 | (Angular|Temporal)&(Temporal|Fusiform) | (Default_mode|Central_executive)&(Limbic|Default_mode) |
| Edge (Functional connectivity) | Pheno1083 | Net100_Pair12_43 | (Frontal|Cerebellum)&(Temporal|Fusiform) | (Central_executive|Default_mode)&(Limbic|Default_mode) |
| Edge (Functional connectivity) | Pheno1084 | Net100_Pair13_43 | (Frontal_Sup)&(Temporal|Fusiform) | (Default_mode)&(Limbic|Default_mode) |
| Edge (Functional connectivity) | Pheno1085 | Net100_Pair14_43 | (Cuneus|Occipital)&(Temporal|Fusiform) | (Visual)&(Limbic|Default_mode) |
| Edge (Functional connectivity) | Pheno1086 | Net100_Pair15_43 | (Insula|Cingulate)&(Temporal|Fusiform) | (Salience|Default_mode)&(Limbic|Default_mode) |
| Edge (Functional connectivity) | Pheno1087 | Net100_Pair16_43 | (Occipital)&(Temporal|Fusiform) | (Visual)&(Limbic|Default_mode) |
| Edge (Functional connectivity) | Pheno1088 | Net100_Pair17_43 | (Cerebellum)&(Temporal|Fusiform) | (Subcortical-cerebellum)&(Limbic|Default_mode) |
| Edge (Functional connectivity) | Pheno1089 | Net100_Pair18_43 | (Parietal)&(Temporal|Fusiform) | (Attention|Central_executive|Salience)&(Limbic|Default_mode) |
| Edge (Functional connectivity) | Pheno1090 | Net100_Pair19_43 | (Precuneus|Cuneus|Cingulate)&(Temporal|Fusiform) | (Default_mode|Central_executive)&(Limbic|Default_mode) |
| Edge (Functional connectivity) | Pheno1091 | Net100_Pair20_43 | (Postcentral|Precentral)&(Temporal|Fusiform) | (Motor|Attention)&(Limbic|Default_mode) |
| Edge (Functional connectivity) | Pheno1092 | Net100_Pair21_43 | (Frontal_Sup)&(Temporal|Fusiform) | (Default_mode|Central_executive)&(Limbic|Default_mode) |
| Edge (Functional connectivity) | Pheno1093 | Net100_Pair22_43 | (Temporal_Sup)&(Temporal|Fusiform) | (Default_mode|Motor)&(Limbic|Default_mode) |
| Edge (Functional connectivity) | Pheno1094 | Net100_Pair23_43 | (Cerebellum)&(Temporal|Fusiform) | (Subcortical-cerebellum)&(Limbic|Default_mode) |
| Edge (Functional connectivity) | Pheno1095 | Net100_Pair24_43 | (Parietal)&(Temporal|Fusiform) | (Central_executive|Attention)&(Limbic|Default_mode) |
| Edge (Functional connectivity) | Pheno1096 | Net100_Pair25_43 | (Frontal|Precentral)&(Temporal|Fusiform) | (Central_executive)&(Limbic|Default_mode) |
| Edge (Functional connectivity) | Pheno1097 | Net100_Pair26_43 | (Parietal|Frontal)&(Temporal|Fusiform) | (Attention|Central_executive)&(Limbic|Default_mode) |
| Edge (Functional connectivity) | Pheno1098 | Net100_Pair27_43 | (Precentral|Frontal|Supp_Motor_Area)&(Temporal|Fusiform) | (Attention|Salience|Motor)&(Limbic|Default_mode) |
| Edge (Functional connectivity) | Pheno1099 | Net100_Pair28_43 | (Supp_Motor_Area|Frontal)&(Temporal|Fusiform) | (Salience|Default_mode)&(Limbic|Default_mode) |
| Edge (Functional connectivity) | Pheno1100 | Net100_Pair29_43 | (Parietal)&(Temporal|Fusiform) | (Central_executive|Salience)&(Limbic|Default_mode) |
| Edge (Functional connectivity) | Pheno1101 | Net100_Pair30_43 | (Paracentral)&(Temporal|Fusiform) | (Motor)&(Limbic|Default_mode) |
| Edge (Functional connectivity) | Pheno1102 | Net100_Pair31_43 | (Frontal)&(Temporal|Fusiform) | (Central_executive)&(Limbic|Default_mode) |
| Edge (Functional connectivity) | Pheno1103 | Net100_Pair32_43 | (Postcentral|Precentral)&(Temporal|Fusiform) | (Motor|Attention)&(Limbic|Default_mode) |
| Edge (Functional connectivity) | Pheno1104 | Net100_Pair33_43 | (Temporal|Frontal|Supp_Motor_Area)&(Temporal|Fusiform) | (Default_mode|Salience)&(Limbic|Default_mode) |
| Edge (Functional connectivity) | Pheno1105 | Net100_Pair34_43 | (Parietal|Postcentral|Precuneus)&(Temporal|Fusiform) | (Attention)&(Limbic|Default_mode) |
| Edge (Functional connectivity) | Pheno1106 | Net100_Pair35_43 | (Postcentral|Precentral)&(Temporal|Fusiform) | (Motor)&(Limbic|Default_mode) |
| Edge (Functional connectivity) | Pheno1107 | Net100_Pair36_43 | (Precuneus)&(Temporal|Fusiform) | (Default_mode|Central_executive)&(Limbic|Default_mode) |
| Edge (Functional connectivity) | Pheno1108 | Net100_Pair37_43 | (Frontal)&(Temporal|Fusiform) | (Central_executive|Salience)&(Limbic|Default_mode) |
| Edge (Functional connectivity) | Pheno1109 | Net100_Pair38_43 | (Subcortical)&(Temporal|Fusiform) | (Subcortical-cerebellum)&(Limbic|Default_mode) |
| Edge (Functional connectivity) | Pheno1110 | Net100_Pair39_43 | (Precuneus|Parietal_Sup)&(Temporal|Fusiform) | (Attention|Central_executive)&(Limbic|Default_mode) |
| Edge (Functional connectivity) | Pheno1111 | Net100_Pair40_43 | (Frontal)&(Temporal|Fusiform) | (Central_executive)&(Limbic|Default_mode) |
| Edge (Functional connectivity) | Pheno1112 | Net100_Pair41_43 | (Temporal|Occipital)&(Temporal|Fusiform) | (Attention|Visual)&(Limbic|Default_mode) |
| Edge (Functional connectivity) | Pheno1113 | Net100_Pair42_43 | (Temporal|Occipital)&(Temporal|Fusiform) | (Attention|Visual)&(Limbic|Default_mode) |
| Edge (Functional connectivity) | Pheno1114 | Net100_Pair1_44 | (Calcarine|Lingual|Cuneus)&(Frontal_Inf) | (Visual)&(Default_mode|Central_executive) |
| Edge (Functional connectivity) | Pheno1115 | Net100_Pair2_44 | (RolandicOper|SupraMarginal|Insula)&(Frontal_Inf) | (Salience|Motor)&(Default_mode|Central_executive) |
| Edge (Functional connectivity) | Pheno1116 | Net100_Pair3_44 | (Lingual|Fusiform)&(Frontal_Inf) | (Visual)&(Default_mode|Central_executive) |
| Edge (Functional connectivity) | Pheno1117 | Net100_Pair4_44 | (Occipital)&(Frontal_Inf) | (Attention|Visual)&(Default_mode|Central_executive) |
| Edge (Functional connectivity) | Pheno1118 | Net100_Pair5_44 | (Precuneus|Angular|Cingulate)&(Frontal_Inf) | (Default_mode|Central_executive)&(Default_mode|Central_executive) |
| Edge (Functional connectivity) | Pheno1119 | Net100_Pair6_44 | (Postcentral|Precentral)&(Frontal_Inf) | (Motor)&(Default_mode|Central_executive) |
| Edge (Functional connectivity) | Pheno1120 | Net100_Pair7_44 | (Frontal|Cingulate)&(Frontal_Inf) | (Default_mode|Limbic)&(Default_mode|Central_executive) |
| Edge (Functional connectivity) | Pheno1121 | Net100_Pair8_44 | (Calcarine|Lingual)&(Frontal_Inf) | (Visual)&(Default_mode|Central_executive) |
| Edge (Functional connectivity) | Pheno1122 | Net100_Pair9_44 | (Temporal)&(Frontal_Inf) | (Default_mode)&(Default_mode|Central_executive) |
| Edge (Functional connectivity) | Pheno1123 | Net100_Pair10_44 | (OccipitalPrecuneus)&(Frontal_Inf) | (Default_mode|Central_executive)&(Default_mode|Central_executive) |
| Edge (Functional connectivity) | Pheno1124 | Net100_Pair11_44 | (Angular|Temporal)&(Frontal_Inf) | (Default_mode|Central_executive)&(Default_mode|Central_executive) |
| Edge (Functional connectivity) | Pheno1125 | Net100_Pair12_44 | (Frontal|Cerebellum)&(Frontal_Inf) | (Central_executive|Default_mode)&(Default_mode|Central_executive) |
| Edge (Functional connectivity) | Pheno1126 | Net100_Pair13_44 | (Frontal_Sup)&(Frontal_Inf) | (Default_mode)&(Default_mode|Central_executive) |
| Edge (Functional connectivity) | Pheno1127 | Net100_Pair14_44 | (Cuneus|Occipital)&(Frontal_Inf) | (Visual)&(Default_mode|Central_executive) |
| Edge (Functional connectivity) | Pheno1128 | Net100_Pair15_44 | (Insula|Cingulate)&(Frontal_Inf) | (Salience|Default_mode)&(Default_mode|Central_executive) |
| Edge (Functional connectivity) | Pheno1129 | Net100_Pair16_44 | (Occipital)&(Frontal_Inf) | (Visual)&(Default_mode|Central_executive) |
| Edge (Functional connectivity) | Pheno1130 | Net100_Pair17_44 | (Cerebellum)&(Frontal_Inf) | (Subcortical-cerebellum)&(Default_mode|Central_executive) |
| Edge (Functional connectivity) | Pheno1131 | Net100_Pair18_44 | (Parietal)&(Frontal_Inf) | (Attention|Central_executive|Salience)&(Default_mode|Central_executive) |
| Edge (Functional connectivity) | Pheno1132 | Net100_Pair19_44 | (Precuneus|Cuneus|Cingulate)&(Frontal_Inf) | (Default_mode|Central_executive)&(Default_mode|Central_executive) |
| Edge (Functional connectivity) | Pheno1133 | Net100_Pair20_44 | (Postcentral|Precentral)&(Frontal_Inf) | (Motor|Attention)&(Default_mode|Central_executive) |
| Edge (Functional connectivity) | Pheno1134 | Net100_Pair21_44 | (Frontal_Sup)&(Frontal_Inf) | (Default_mode|Central_executive)&(Default_mode|Central_executive) |
| Edge (Functional connectivity) | Pheno1135 | Net100_Pair22_44 | (Temporal_Sup)&(Frontal_Inf) | (Default_mode|Motor)&(Default_mode|Central_executive) |
| Edge (Functional connectivity) | Pheno1136 | Net100_Pair23_44 | (Cerebellum)&(Frontal_Inf) | (Subcortical-cerebellum)&(Default_mode|Central_executive) |
| Edge (Functional connectivity) | Pheno1137 | Net100_Pair24_44 | (Parietal)&(Frontal_Inf) | (Central_executive|Attention)&(Default_mode|Central_executive) |
| Edge (Functional connectivity) | Pheno1138 | Net100_Pair25_44 | (Frontal|Precentral)&(Frontal_Inf) | (Central_executive)&(Default_mode|Central_executive) |
| Edge (Functional connectivity) | Pheno1139 | Net100_Pair26_44 | (Parietal|Frontal)&(Frontal_Inf) | (Attention|Central_executive)&(Default_mode|Central_executive) |
| Edge (Functional connectivity) | Pheno1140 | Net100_Pair27_44 | (Precentral|Frontal|Supp_Motor_Area)&(Frontal_Inf) | (Attention|Salience|Motor)&(Default_mode|Central_executive) |
| Edge (Functional connectivity) | Pheno1141 | Net100_Pair28_44 | (Supp_Motor_Area|Frontal)&(Frontal_Inf) | (Salience|Default_mode)&(Default_mode|Central_executive) |
| Edge (Functional connectivity) | Pheno1142 | Net100_Pair29_44 | (Parietal)&(Frontal_Inf) | (Central_executive|Salience)&(Default_mode|Central_executive) |
| Edge (Functional connectivity) | Pheno1143 | Net100_Pair30_44 | (Paracentral)&(Frontal_Inf) | (Motor)&(Default_mode|Central_executive) |
| Edge (Functional connectivity) | Pheno1144 | Net100_Pair31_44 | (Frontal)&(Frontal_Inf) | (Central_executive)&(Default_mode|Central_executive) |
| Edge (Functional connectivity) | Pheno1145 | Net100_Pair32_44 | (Postcentral|Precentral)&(Frontal_Inf) | (Motor|Attention)&(Default_mode|Central_executive) |
| Edge (Functional connectivity) | Pheno1146 | Net100_Pair33_44 | (Temporal|Frontal|Supp_Motor_Area)&(Frontal_Inf) | (Default_mode|Salience)&(Default_mode|Central_executive) |
| Edge (Functional connectivity) | Pheno1147 | Net100_Pair34_44 | (Parietal|Postcentral|Precuneus)&(Frontal_Inf) | (Attention)&(Default_mode|Central_executive) |
| Edge (Functional connectivity) | Pheno1148 | Net100_Pair35_44 | (Postcentral|Precentral)&(Frontal_Inf) | (Motor)&(Default_mode|Central_executive) |
| Edge (Functional connectivity) | Pheno1149 | Net100_Pair36_44 | (Precuneus)&(Frontal_Inf) | (Default_mode|Central_executive)&(Default_mode|Central_executive) |
| Edge (Functional connectivity) | Pheno1150 | Net100_Pair37_44 | (Frontal)&(Frontal_Inf) | (Central_executive|Salience)&(Default_mode|Central_executive) |
| Edge (Functional connectivity) | Pheno1151 | Net100_Pair38_44 | (Subcortical)&(Frontal_Inf) | (Subcortical-cerebellum)&(Default_mode|Central_executive) |
| Edge (Functional connectivity) | Pheno1152 | Net100_Pair39_44 | (Precuneus|Parietal_Sup)&(Frontal_Inf) | (Attention|Central_executive)&(Default_mode|Central_executive) |
| Edge (Functional connectivity) | Pheno1153 | Net100_Pair40_44 | (Frontal)&(Frontal_Inf) | (Central_executive)&(Default_mode|Central_executive) |
| Edge (Functional connectivity) | Pheno1154 | Net100_Pair41_44 | (Temporal|Occipital)&(Frontal_Inf) | (Attention|Visual)&(Default_mode|Central_executive) |
| Edge (Functional connectivity) | Pheno1155 | Net100_Pair42_44 | (Temporal|Occipital)&(Frontal_Inf) | (Attention|Visual)&(Default_mode|Central_executive) |
| Edge (Functional connectivity) | Pheno1156 | Net100_Pair43_44 | (Temporal|Fusiform)&(Frontal_Inf) | (Limbic|Default_mode)&(Default_mode|Central_executive) |
| Edge (Functional connectivity) | Pheno1157 | Net100_Pair1_45 | (Calcarine|Lingual|Cuneus)&(Frontal) | (Visual)&(Salience|Default_mode) |
| Edge (Functional connectivity) | Pheno1158 | Net100_Pair2_45 | (RolandicOper|SupraMarginal|Insula)&(Frontal) | (Salience|Motor)&(Salience|Default_mode) |
| Edge (Functional connectivity) | Pheno1159 | Net100_Pair3_45 | (Lingual|Fusiform)&(Frontal) | (Visual)&(Salience|Default_mode) |
| Edge (Functional connectivity) | Pheno1160 | Net100_Pair4_45 | (Occipital)&(Frontal) | (Attention|Visual)&(Salience|Default_mode) |
| Edge (Functional connectivity) | Pheno1161 | Net100_Pair5_45 | (Precuneus|Angular|Cingulate)&(Frontal) | (Default_mode|Central_executive)&(Salience|Default_mode) |
| Edge (Functional connectivity) | Pheno1162 | Net100_Pair6_45 | (Postcentral|Precentral)&(Frontal) | (Motor)&(Salience|Default_mode) |
| Edge (Functional connectivity) | Pheno1163 | Net100_Pair7_45 | (Frontal|Cingulate)&(Frontal) | (Default_mode|Limbic)&(Salience|Default_mode) |
| Edge (Functional connectivity) | Pheno1164 | Net100_Pair8_45 | (Calcarine|Lingual)&(Frontal) | (Visual)&(Salience|Default_mode) |
| Edge (Functional connectivity) | Pheno1165 | Net100_Pair9_45 | (Temporal)&(Frontal) | (Default_mode)&(Salience|Default_mode) |
| Edge (Functional connectivity) | Pheno1166 | Net100_Pair10_45 | (OccipitalPrecuneus)&(Frontal) | (Default_mode|Central_executive)&(Salience|Default_mode) |
| Edge (Functional connectivity) | Pheno1167 | Net100_Pair11_45 | (Angular|Temporal)&(Frontal) | (Default_mode|Central_executive)&(Salience|Default_mode) |
| Edge (Functional connectivity) | Pheno1168 | Net100_Pair12_45 | (Frontal|Cerebellum)&(Frontal) | (Central_executive|Default_mode)&(Salience|Default_mode) |
| Edge (Functional connectivity) | Pheno1169 | Net100_Pair13_45 | (Frontal_Sup)&(Frontal) | (Default_mode)&(Salience|Default_mode) |
| Edge (Functional connectivity) | Pheno1170 | Net100_Pair14_45 | (Cuneus|Occipital)&(Frontal) | (Visual)&(Salience|Default_mode) |
| Edge (Functional connectivity) | Pheno1171 | Net100_Pair15_45 | (Insula|Cingulate)&(Frontal) | (Salience|Default_mode)&(Salience|Default_mode) |
| Edge (Functional connectivity) | Pheno1172 | Net100_Pair16_45 | (Occipital)&(Frontal) | (Visual)&(Salience|Default_mode) |
| Edge (Functional connectivity) | Pheno1173 | Net100_Pair17_45 | (Cerebellum)&(Frontal) | (Subcortical-cerebellum)&(Salience|Default_mode) |
| Edge (Functional connectivity) | Pheno1174 | Net100_Pair18_45 | (Parietal)&(Frontal) | (Attention|Central_executive|Salience)&(Salience|Default_mode) |
| Edge (Functional connectivity) | Pheno1175 | Net100_Pair19_45 | (Precuneus|Cuneus|Cingulate)&(Frontal) | (Default_mode|Central_executive)&(Salience|Default_mode) |
| Edge (Functional connectivity) | Pheno1176 | Net100_Pair20_45 | (Postcentral|Precentral)&(Frontal) | (Motor|Attention)&(Salience|Default_mode) |
| Edge (Functional connectivity) | Pheno1177 | Net100_Pair21_45 | (Frontal_Sup)&(Frontal) | (Default_mode|Central_executive)&(Salience|Default_mode) |
| Edge (Functional connectivity) | Pheno1178 | Net100_Pair22_45 | (Temporal_Sup)&(Frontal) | (Default_mode|Motor)&(Salience|Default_mode) |
| Edge (Functional connectivity) | Pheno1179 | Net100_Pair23_45 | (Cerebellum)&(Frontal) | (Subcortical-cerebellum)&(Salience|Default_mode) |
| Edge (Functional connectivity) | Pheno1180 | Net100_Pair24_45 | (Parietal)&(Frontal) | (Central_executive|Attention)&(Salience|Default_mode) |
| Edge (Functional connectivity) | Pheno1181 | Net100_Pair25_45 | (Frontal|Precentral)&(Frontal) | (Central_executive)&(Salience|Default_mode) |
| Edge (Functional connectivity) | Pheno1182 | Net100_Pair26_45 | (Parietal|Frontal)&(Frontal) | (Attention|Central_executive)&(Salience|Default_mode) |
| Edge (Functional connectivity) | Pheno1183 | Net100_Pair27_45 | (Precentral|Frontal|Supp_Motor_Area)&(Frontal) | (Attention|Salience|Motor)&(Salience|Default_mode) |
| Edge (Functional connectivity) | Pheno1184 | Net100_Pair28_45 | (Supp_Motor_Area|Frontal)&(Frontal) | (Salience|Default_mode)&(Salience|Default_mode) |
| Edge (Functional connectivity) | Pheno1185 | Net100_Pair29_45 | (Parietal)&(Frontal) | (Central_executive|Salience)&(Salience|Default_mode) |
| Edge (Functional connectivity) | Pheno1186 | Net100_Pair30_45 | (Paracentral)&(Frontal) | (Motor)&(Salience|Default_mode) |
| Edge (Functional connectivity) | Pheno1187 | Net100_Pair31_45 | (Frontal)&(Frontal) | (Central_executive)&(Salience|Default_mode) |
| Edge (Functional connectivity) | Pheno1188 | Net100_Pair32_45 | (Postcentral|Precentral)&(Frontal) | (Motor|Attention)&(Salience|Default_mode) |
| Edge (Functional connectivity) | Pheno1189 | Net100_Pair33_45 | (Temporal|Frontal|Supp_Motor_Area)&(Frontal) | (Default_mode|Salience)&(Salience|Default_mode) |
| Edge (Functional connectivity) | Pheno1190 | Net100_Pair34_45 | (Parietal|Postcentral|Precuneus)&(Frontal) | (Attention)&(Salience|Default_mode) |
| Edge (Functional connectivity) | Pheno1191 | Net100_Pair35_45 | (Postcentral|Precentral)&(Frontal) | (Motor)&(Salience|Default_mode) |
| Edge (Functional connectivity) | Pheno1192 | Net100_Pair36_45 | (Precuneus)&(Frontal) | (Default_mode|Central_executive)&(Salience|Default_mode) |
| Edge (Functional connectivity) | Pheno1193 | Net100_Pair37_45 | (Frontal)&(Frontal) | (Central_executive|Salience)&(Salience|Default_mode) |
| Edge (Functional connectivity) | Pheno1194 | Net100_Pair38_45 | (Subcortical)&(Frontal) | (Subcortical-cerebellum)&(Salience|Default_mode) |
| Edge (Functional connectivity) | Pheno1195 | Net100_Pair39_45 | (Precuneus|Parietal_Sup)&(Frontal) | (Attention|Central_executive)&(Salience|Default_mode) |
| Edge (Functional connectivity) | Pheno1196 | Net100_Pair40_45 | (Frontal)&(Frontal) | (Central_executive)&(Salience|Default_mode) |
| Edge (Functional connectivity) | Pheno1197 | Net100_Pair41_45 | (Temporal|Occipital)&(Frontal) | (Attention|Visual)&(Salience|Default_mode) |
| Edge (Functional connectivity) | Pheno1198 | Net100_Pair42_45 | (Temporal|Occipital)&(Frontal) | (Attention|Visual)&(Salience|Default_mode) |
| Edge (Functional connectivity) | Pheno1199 | Net100_Pair43_45 | (Temporal|Fusiform)&(Frontal) | (Limbic|Default_mode)&(Salience|Default_mode) |
| Edge (Functional connectivity) | Pheno1200 | Net100_Pair44_45 | (Frontal_Inf)&(Frontal) | (Default_mode|Central_executive)&(Salience|Default_mode) |
| Edge (Functional connectivity) | Pheno1201 | Net100_Pair1_46 | (Calcarine|Lingual|Cuneus)&(Temporal) | (Visual)&(Central_executive|Default_mode) |
| Edge (Functional connectivity) | Pheno1202 | Net100_Pair2_46 | (RolandicOper|SupraMarginal|Insula)&(Temporal) | (Salience|Motor)&(Central_executive|Default_mode) |
| Edge (Functional connectivity) | Pheno1203 | Net100_Pair3_46 | (Lingual|Fusiform)&(Temporal) | (Visual)&(Central_executive|Default_mode) |
| Edge (Functional connectivity) | Pheno1204 | Net100_Pair4_46 | (Occipital)&(Temporal) | (Attention|Visual)&(Central_executive|Default_mode) |
| Edge (Functional connectivity) | Pheno1205 | Net100_Pair5_46 | (Precuneus|Angular|Cingulate)&(Temporal) | (Default_mode|Central_executive)&(Central_executive|Default_mode) |
| Edge (Functional connectivity) | Pheno1206 | Net100_Pair6_46 | (Postcentral|Precentral)&(Temporal) | (Motor)&(Central_executive|Default_mode) |
| Edge (Functional connectivity) | Pheno1207 | Net100_Pair7_46 | (Frontal|Cingulate)&(Temporal) | (Default_mode|Limbic)&(Central_executive|Default_mode) |
| Edge (Functional connectivity) | Pheno1208 | Net100_Pair8_46 | (Calcarine|Lingual)&(Temporal) | (Visual)&(Central_executive|Default_mode) |
| Edge (Functional connectivity) | Pheno1209 | Net100_Pair9_46 | (Temporal)&(Temporal) | (Default_mode)&(Central_executive|Default_mode) |
| Edge (Functional connectivity) | Pheno1210 | Net100_Pair10_46 | (OccipitalPrecuneus)&(Temporal) | (Default_mode|Central_executive)&(Central_executive|Default_mode) |
| Edge (Functional connectivity) | Pheno1211 | Net100_Pair11_46 | (Angular|Temporal)&(Temporal) | (Default_mode|Central_executive)&(Central_executive|Default_mode) |
| Edge (Functional connectivity) | Pheno1212 | Net100_Pair12_46 | (Frontal|Cerebellum)&(Temporal) | (Central_executive|Default_mode)&(Central_executive|Default_mode) |
| Edge (Functional connectivity) | Pheno1213 | Net100_Pair13_46 | (Frontal_Sup)&(Temporal) | (Default_mode)&(Central_executive|Default_mode) |
| Edge (Functional connectivity) | Pheno1214 | Net100_Pair14_46 | (Cuneus|Occipital)&(Temporal) | (Visual)&(Central_executive|Default_mode) |
| Edge (Functional connectivity) | Pheno1215 | Net100_Pair15_46 | (Insula|Cingulate)&(Temporal) | (Salience|Default_mode)&(Central_executive|Default_mode) |
| Edge (Functional connectivity) | Pheno1216 | Net100_Pair16_46 | (Occipital)&(Temporal) | (Visual)&(Central_executive|Default_mode) |
| Edge (Functional connectivity) | Pheno1217 | Net100_Pair17_46 | (Cerebellum)&(Temporal) | (Subcortical-cerebellum)&(Central_executive|Default_mode) |
| Edge (Functional connectivity) | Pheno1218 | Net100_Pair18_46 | (Parietal)&(Temporal) | (Attention|Central_executive|Salience)&(Central_executive|Default_mode) |
| Edge (Functional connectivity) | Pheno1219 | Net100_Pair19_46 | (Precuneus|Cuneus|Cingulate)&(Temporal) | (Default_mode|Central_executive)&(Central_executive|Default_mode) |
| Edge (Functional connectivity) | Pheno1220 | Net100_Pair20_46 | (Postcentral|Precentral)&(Temporal) | (Motor|Attention)&(Central_executive|Default_mode) |
| Edge (Functional connectivity) | Pheno1221 | Net100_Pair21_46 | (Frontal_Sup)&(Temporal) | (Default_mode|Central_executive)&(Central_executive|Default_mode) |
| Edge (Functional connectivity) | Pheno1222 | Net100_Pair22_46 | (Temporal_Sup)&(Temporal) | (Default_mode|Motor)&(Central_executive|Default_mode) |
| Edge (Functional connectivity) | Pheno1223 | Net100_Pair23_46 | (Cerebellum)&(Temporal) | (Subcortical-cerebellum)&(Central_executive|Default_mode) |
| Edge (Functional connectivity) | Pheno1224 | Net100_Pair24_46 | (Parietal)&(Temporal) | (Central_executive|Attention)&(Central_executive|Default_mode) |
| Edge (Functional connectivity) | Pheno1225 | Net100_Pair25_46 | (Frontal|Precentral)&(Temporal) | (Central_executive)&(Central_executive|Default_mode) |
| Edge (Functional connectivity) | Pheno1226 | Net100_Pair26_46 | (Parietal|Frontal)&(Temporal) | (Attention|Central_executive)&(Central_executive|Default_mode) |
| Edge (Functional connectivity) | Pheno1227 | Net100_Pair27_46 | (Precentral|Frontal|Supp_Motor_Area)&(Temporal) | (Attention|Salience|Motor)&(Central_executive|Default_mode) |
| Edge (Functional connectivity) | Pheno1228 | Net100_Pair28_46 | (Supp_Motor_Area|Frontal)&(Temporal) | (Salience|Default_mode)&(Central_executive|Default_mode) |
| Edge (Functional connectivity) | Pheno1229 | Net100_Pair29_46 | (Parietal)&(Temporal) | (Central_executive|Salience)&(Central_executive|Default_mode) |
| Edge (Functional connectivity) | Pheno1230 | Net100_Pair30_46 | (Paracentral)&(Temporal) | (Motor)&(Central_executive|Default_mode) |
| Edge (Functional connectivity) | Pheno1231 | Net100_Pair31_46 | (Frontal)&(Temporal) | (Central_executive)&(Central_executive|Default_mode) |
| Edge (Functional connectivity) | Pheno1232 | Net100_Pair32_46 | (Postcentral|Precentral)&(Temporal) | (Motor|Attention)&(Central_executive|Default_mode) |
| Edge (Functional connectivity) | Pheno1233 | Net100_Pair33_46 | (Temporal|Frontal|Supp_Motor_Area)&(Temporal) | (Default_mode|Salience)&(Central_executive|Default_mode) |
| Edge (Functional connectivity) | Pheno1234 | Net100_Pair34_46 | (Parietal|Postcentral|Precuneus)&(Temporal) | (Attention)&(Central_executive|Default_mode) |
| Edge (Functional connectivity) | Pheno1235 | Net100_Pair35_46 | (Postcentral|Precentral)&(Temporal) | (Motor)&(Central_executive|Default_mode) |
| Edge (Functional connectivity) | Pheno1236 | Net100_Pair36_46 | (Precuneus)&(Temporal) | (Default_mode|Central_executive)&(Central_executive|Default_mode) |
| Edge (Functional connectivity) | Pheno1237 | Net100_Pair37_46 | (Frontal)&(Temporal) | (Central_executive|Salience)&(Central_executive|Default_mode) |
| Edge (Functional connectivity) | Pheno1238 | Net100_Pair38_46 | (Subcortical)&(Temporal) | (Subcortical-cerebellum)&(Central_executive|Default_mode) |
| Edge (Functional connectivity) | Pheno1239 | Net100_Pair39_46 | (Precuneus|Parietal_Sup)&(Temporal) | (Attention|Central_executive)&(Central_executive|Default_mode) |
| Edge (Functional connectivity) | Pheno1240 | Net100_Pair40_46 | (Frontal)&(Temporal) | (Central_executive)&(Central_executive|Default_mode) |
| Edge (Functional connectivity) | Pheno1241 | Net100_Pair41_46 | (Temporal|Occipital)&(Temporal) | (Attention|Visual)&(Central_executive|Default_mode) |
| Edge (Functional connectivity) | Pheno1242 | Net100_Pair42_46 | (Temporal|Occipital)&(Temporal) | (Attention|Visual)&(Central_executive|Default_mode) |
| Edge (Functional connectivity) | Pheno1243 | Net100_Pair43_46 | (Temporal|Fusiform)&(Temporal) | (Limbic|Default_mode)&(Central_executive|Default_mode) |
| Edge (Functional connectivity) | Pheno1244 | Net100_Pair44_46 | (Frontal_Inf)&(Temporal) | (Default_mode|Central_executive)&(Central_executive|Default_mode) |
| Edge (Functional connectivity) | Pheno1245 | Net100_Pair45_46 | (Frontal)&(Temporal) | (Salience|Default_mode)&(Central_executive|Default_mode) |
| Edge (Functional connectivity) | Pheno1246 | Net100_Pair1_47 | (Calcarine|Lingual|Cuneus)&(Frontal) | (Visual)&(Central_executive|Salience|Default_mode) |
| Edge (Functional connectivity) | Pheno1247 | Net100_Pair2_47 | (RolandicOper|SupraMarginal|Insula)&(Frontal) | (Salience|Motor)&(Central_executive|Salience|Default_mode) |
| Edge (Functional connectivity) | Pheno1248 | Net100_Pair3_47 | (Lingual|Fusiform)&(Frontal) | (Visual)&(Central_executive|Salience|Default_mode) |
| Edge (Functional connectivity) | Pheno1249 | Net100_Pair4_47 | (Occipital)&(Frontal) | (Attention|Visual)&(Central_executive|Salience|Default_mode) |
| Edge (Functional connectivity) | Pheno1250 | Net100_Pair5_47 | (Precuneus|Angular|Cingulate)&(Frontal) | (Default_mode|Central_executive)&(Central_executive|Salience|Default_mode) |
| Edge (Functional connectivity) | Pheno1251 | Net100_Pair6_47 | (Postcentral|Precentral)&(Frontal) | (Motor)&(Central_executive|Salience|Default_mode) |
| Edge (Functional connectivity) | Pheno1252 | Net100_Pair7_47 | (Frontal|Cingulate)&(Frontal) | (Default_mode|Limbic)&(Central_executive|Salience|Default_mode) |
| Edge (Functional connectivity) | Pheno1253 | Net100_Pair8_47 | (Calcarine|Lingual)&(Frontal) | (Visual)&(Central_executive|Salience|Default_mode) |
| Edge (Functional connectivity) | Pheno1254 | Net100_Pair9_47 | (Temporal)&(Frontal) | (Default_mode)&(Central_executive|Salience|Default_mode) |
| Edge (Functional connectivity) | Pheno1255 | Net100_Pair10_47 | (OccipitalPrecuneus)&(Frontal) | (Default_mode|Central_executive)&(Central_executive|Salience|Default_mode) |
| Edge (Functional connectivity) | Pheno1256 | Net100_Pair11_47 | (Angular|Temporal)&(Frontal) | (Default_mode|Central_executive)&(Central_executive|Salience|Default_mode) |
| Edge (Functional connectivity) | Pheno1257 | Net100_Pair12_47 | (Frontal|Cerebellum)&(Frontal) | (Central_executive|Default_mode)&(Central_executive|Salience|Default_mode) |
| Edge (Functional connectivity) | Pheno1258 | Net100_Pair13_47 | (Frontal_Sup)&(Frontal) | (Default_mode)&(Central_executive|Salience|Default_mode) |
| Edge (Functional connectivity) | Pheno1259 | Net100_Pair14_47 | (Cuneus|Occipital)&(Frontal) | (Visual)&(Central_executive|Salience|Default_mode) |
| Edge (Functional connectivity) | Pheno1260 | Net100_Pair15_47 | (Insula|Cingulate)&(Frontal) | (Salience|Default_mode)&(Central_executive|Salience|Default_mode) |
| Edge (Functional connectivity) | Pheno1261 | Net100_Pair16_47 | (Occipital)&(Frontal) | (Visual)&(Central_executive|Salience|Default_mode) |
| Edge (Functional connectivity) | Pheno1262 | Net100_Pair17_47 | (Cerebellum)&(Frontal) | (Subcortical-cerebellum)&(Central_executive|Salience|Default_mode) |
| Edge (Functional connectivity) | Pheno1263 | Net100_Pair18_47 | (Parietal)&(Frontal) | (Attention|Central_executive|Salience)&(Central_executive|Salience|Default_mode) |
| Edge (Functional connectivity) | Pheno1264 | Net100_Pair19_47 | (Precuneus|Cuneus|Cingulate)&(Frontal) | (Default_mode|Central_executive)&(Central_executive|Salience|Default_mode) |
| Edge (Functional connectivity) | Pheno1265 | Net100_Pair20_47 | (Postcentral|Precentral)&(Frontal) | (Motor|Attention)&(Central_executive|Salience|Default_mode) |
| Edge (Functional connectivity) | Pheno1266 | Net100_Pair21_47 | (Frontal_Sup)&(Frontal) | (Default_mode|Central_executive)&(Central_executive|Salience|Default_mode) |
| Edge (Functional connectivity) | Pheno1267 | Net100_Pair22_47 | (Temporal_Sup)&(Frontal) | (Default_mode|Motor)&(Central_executive|Salience|Default_mode) |
| Edge (Functional connectivity) | Pheno1268 | Net100_Pair23_47 | (Cerebellum)&(Frontal) | (Subcortical-cerebellum)&(Central_executive|Salience|Default_mode) |
| Edge (Functional connectivity) | Pheno1269 | Net100_Pair24_47 | (Parietal)&(Frontal) | (Central_executive|Attention)&(Central_executive|Salience|Default_mode) |
| Edge (Functional connectivity) | Pheno1270 | Net100_Pair25_47 | (Frontal|Precentral)&(Frontal) | (Central_executive)&(Central_executive|Salience|Default_mode) |
| Edge (Functional connectivity) | Pheno1271 | Net100_Pair26_47 | (Parietal|Frontal)&(Frontal) | (Attention|Central_executive)&(Central_executive|Salience|Default_mode) |
| Edge (Functional connectivity) | Pheno1272 | Net100_Pair27_47 | (Precentral|Frontal|Supp_Motor_Area)&(Frontal) | (Attention|Salience|Motor)&(Central_executive|Salience|Default_mode) |
| Edge (Functional connectivity) | Pheno1273 | Net100_Pair28_47 | (Supp_Motor_Area|Frontal)&(Frontal) | (Salience|Default_mode)&(Central_executive|Salience|Default_mode) |
| Edge (Functional connectivity) | Pheno1274 | Net100_Pair29_47 | (Parietal)&(Frontal) | (Central_executive|Salience)&(Central_executive|Salience|Default_mode) |
| Edge (Functional connectivity) | Pheno1275 | Net100_Pair30_47 | (Paracentral)&(Frontal) | (Motor)&(Central_executive|Salience|Default_mode) |
| Edge (Functional connectivity) | Pheno1276 | Net100_Pair31_47 | (Frontal)&(Frontal) | (Central_executive)&(Central_executive|Salience|Default_mode) |
| Edge (Functional connectivity) | Pheno1277 | Net100_Pair32_47 | (Postcentral|Precentral)&(Frontal) | (Motor|Attention)&(Central_executive|Salience|Default_mode) |
| Edge (Functional connectivity) | Pheno1278 | Net100_Pair33_47 | (Temporal|Frontal|Supp_Motor_Area)&(Frontal) | (Default_mode|Salience)&(Central_executive|Salience|Default_mode) |
| Edge (Functional connectivity) | Pheno1279 | Net100_Pair34_47 | (Parietal|Postcentral|Precuneus)&(Frontal) | (Attention)&(Central_executive|Salience|Default_mode) |
| Edge (Functional connectivity) | Pheno1280 | Net100_Pair35_47 | (Postcentral|Precentral)&(Frontal) | (Motor)&(Central_executive|Salience|Default_mode) |
| Edge (Functional connectivity) | Pheno1281 | Net100_Pair36_47 | (Precuneus)&(Frontal) | (Default_mode|Central_executive)&(Central_executive|Salience|Default_mode) |
| Edge (Functional connectivity) | Pheno1282 | Net100_Pair37_47 | (Frontal)&(Frontal) | (Central_executive|Salience)&(Central_executive|Salience|Default_mode) |
| Edge (Functional connectivity) | Pheno1283 | Net100_Pair38_47 | (Subcortical)&(Frontal) | (Subcortical-cerebellum)&(Central_executive|Salience|Default_mode) |
| Edge (Functional connectivity) | Pheno1284 | Net100_Pair39_47 | (Precuneus|Parietal_Sup)&(Frontal) | (Attention|Central_executive)&(Central_executive|Salience|Default_mode) |
| Edge (Functional connectivity) | Pheno1285 | Net100_Pair40_47 | (Frontal)&(Frontal) | (Central_executive)&(Central_executive|Salience|Default_mode) |
| Edge (Functional connectivity) | Pheno1286 | Net100_Pair41_47 | (Temporal|Occipital)&(Frontal) | (Attention|Visual)&(Central_executive|Salience|Default_mode) |
| Edge (Functional connectivity) | Pheno1287 | Net100_Pair42_47 | (Temporal|Occipital)&(Frontal) | (Attention|Visual)&(Central_executive|Salience|Default_mode) |
| Edge (Functional connectivity) | Pheno1288 | Net100_Pair43_47 | (Temporal|Fusiform)&(Frontal) | (Limbic|Default_mode)&(Central_executive|Salience|Default_mode) |
| Edge (Functional connectivity) | Pheno1289 | Net100_Pair44_47 | (Frontal_Inf)&(Frontal) | (Default_mode|Central_executive)&(Central_executive|Salience|Default_mode) |
| Edge (Functional connectivity) | Pheno1290 | Net100_Pair45_47 | (Frontal)&(Frontal) | (Salience|Default_mode)&(Central_executive|Salience|Default_mode) |
| Edge (Functional connectivity) | Pheno1291 | Net100_Pair46_47 | (Temporal)&(Frontal) | (Central_executive|Default_mode)&(Central_executive|Salience|Default_mode) |
| Edge (Functional connectivity) | Pheno1292 | Net100_Pair1_48 | (Calcarine|Lingual|Cuneus)&(Temporal) | (Visual)&(Default_mode|Central_executive) |
| Edge (Functional connectivity) | Pheno1293 | Net100_Pair2_48 | (RolandicOper|SupraMarginal|Insula)&(Temporal) | (Salience|Motor)&(Default_mode|Central_executive) |
| Edge (Functional connectivity) | Pheno1294 | Net100_Pair3_48 | (Lingual|Fusiform)&(Temporal) | (Visual)&(Default_mode|Central_executive) |
| Edge (Functional connectivity) | Pheno1295 | Net100_Pair4_48 | (Occipital)&(Temporal) | (Attention|Visual)&(Default_mode|Central_executive) |
| Edge (Functional connectivity) | Pheno1296 | Net100_Pair5_48 | (Precuneus|Angular|Cingulate)&(Temporal) | (Default_mode|Central_executive)&(Default_mode|Central_executive) |
| Edge (Functional connectivity) | Pheno1297 | Net100_Pair6_48 | (Postcentral|Precentral)&(Temporal) | (Motor)&(Default_mode|Central_executive) |
| Edge (Functional connectivity) | Pheno1298 | Net100_Pair7_48 | (Frontal|Cingulate)&(Temporal) | (Default_mode|Limbic)&(Default_mode|Central_executive) |
| Edge (Functional connectivity) | Pheno1299 | Net100_Pair8_48 | (Calcarine|Lingual)&(Temporal) | (Visual)&(Default_mode|Central_executive) |
| Edge (Functional connectivity) | Pheno1300 | Net100_Pair9_48 | (Temporal)&(Temporal) | (Default_mode)&(Default_mode|Central_executive) |
| Edge (Functional connectivity) | Pheno1301 | Net100_Pair10_48 | (OccipitalPrecuneus)&(Temporal) | (Default_mode|Central_executive)&(Default_mode|Central_executive) |
| Edge (Functional connectivity) | Pheno1302 | Net100_Pair11_48 | (Angular|Temporal)&(Temporal) | (Default_mode|Central_executive)&(Default_mode|Central_executive) |
| Edge (Functional connectivity) | Pheno1303 | Net100_Pair12_48 | (Frontal|Cerebellum)&(Temporal) | (Central_executive|Default_mode)&(Default_mode|Central_executive) |
| Edge (Functional connectivity) | Pheno1304 | Net100_Pair13_48 | (Frontal_Sup)&(Temporal) | (Default_mode)&(Default_mode|Central_executive) |
| Edge (Functional connectivity) | Pheno1305 | Net100_Pair14_48 | (Cuneus|Occipital)&(Temporal) | (Visual)&(Default_mode|Central_executive) |
| Edge (Functional connectivity) | Pheno1306 | Net100_Pair15_48 | (Insula|Cingulate)&(Temporal) | (Salience|Default_mode)&(Default_mode|Central_executive) |
| Edge (Functional connectivity) | Pheno1307 | Net100_Pair16_48 | (Occipital)&(Temporal) | (Visual)&(Default_mode|Central_executive) |
| Edge (Functional connectivity) | Pheno1308 | Net100_Pair17_48 | (Cerebellum)&(Temporal) | (Subcortical-cerebellum)&(Default_mode|Central_executive) |
| Edge (Functional connectivity) | Pheno1309 | Net100_Pair18_48 | (Parietal)&(Temporal) | (Attention|Central_executive|Salience)&(Default_mode|Central_executive) |
| Edge (Functional connectivity) | Pheno1310 | Net100_Pair19_48 | (Precuneus|Cuneus|Cingulate)&(Temporal) | (Default_mode|Central_executive)&(Default_mode|Central_executive) |
| Edge (Functional connectivity) | Pheno1311 | Net100_Pair20_48 | (Postcentral|Precentral)&(Temporal) | (Motor|Attention)&(Default_mode|Central_executive) |
| Edge (Functional connectivity) | Pheno1312 | Net100_Pair21_48 | (Frontal_Sup)&(Temporal) | (Default_mode|Central_executive)&(Default_mode|Central_executive) |
| Edge (Functional connectivity) | Pheno1313 | Net100_Pair22_48 | (Temporal_Sup)&(Temporal) | (Default_mode|Motor)&(Default_mode|Central_executive) |
| Edge (Functional connectivity) | Pheno1314 | Net100_Pair23_48 | (Cerebellum)&(Temporal) | (Subcortical-cerebellum)&(Default_mode|Central_executive) |
| Edge (Functional connectivity) | Pheno1315 | Net100_Pair24_48 | (Parietal)&(Temporal) | (Central_executive|Attention)&(Default_mode|Central_executive) |
| Edge (Functional connectivity) | Pheno1316 | Net100_Pair25_48 | (Frontal|Precentral)&(Temporal) | (Central_executive)&(Default_mode|Central_executive) |
| Edge (Functional connectivity) | Pheno1317 | Net100_Pair26_48 | (Parietal|Frontal)&(Temporal) | (Attention|Central_executive)&(Default_mode|Central_executive) |
| Edge (Functional connectivity) | Pheno1318 | Net100_Pair27_48 | (Precentral|Frontal|Supp_Motor_Area)&(Temporal) | (Attention|Salience|Motor)&(Default_mode|Central_executive) |
| Edge (Functional connectivity) | Pheno1319 | Net100_Pair28_48 | (Supp_Motor_Area|Frontal)&(Temporal) | (Salience|Default_mode)&(Default_mode|Central_executive) |
| Edge (Functional connectivity) | Pheno1320 | Net100_Pair29_48 | (Parietal)&(Temporal) | (Central_executive|Salience)&(Default_mode|Central_executive) |
| Edge (Functional connectivity) | Pheno1321 | Net100_Pair30_48 | (Paracentral)&(Temporal) | (Motor)&(Default_mode|Central_executive) |
| Edge (Functional connectivity) | Pheno1322 | Net100_Pair31_48 | (Frontal)&(Temporal) | (Central_executive)&(Default_mode|Central_executive) |
| Edge (Functional connectivity) | Pheno1323 | Net100_Pair32_48 | (Postcentral|Precentral)&(Temporal) | (Motor|Attention)&(Default_mode|Central_executive) |
| Edge (Functional connectivity) | Pheno1324 | Net100_Pair33_48 | (Temporal|Frontal|Supp_Motor_Area)&(Temporal) | (Default_mode|Salience)&(Default_mode|Central_executive) |
| Edge (Functional connectivity) | Pheno1325 | Net100_Pair34_48 | (Parietal|Postcentral|Precuneus)&(Temporal) | (Attention)&(Default_mode|Central_executive) |
| Edge (Functional connectivity) | Pheno1326 | Net100_Pair35_48 | (Postcentral|Precentral)&(Temporal) | (Motor)&(Default_mode|Central_executive) |
| Edge (Functional connectivity) | Pheno1327 | Net100_Pair36_48 | (Precuneus)&(Temporal) | (Default_mode|Central_executive)&(Default_mode|Central_executive) |
| Edge (Functional connectivity) | Pheno1328 | Net100_Pair37_48 | (Frontal)&(Temporal) | (Central_executive|Salience)&(Default_mode|Central_executive) |
| Edge (Functional connectivity) | Pheno1329 | Net100_Pair38_48 | (Subcortical)&(Temporal) | (Subcortical-cerebellum)&(Default_mode|Central_executive) |
| Edge (Functional connectivity) | Pheno1330 | Net100_Pair39_48 | (Precuneus|Parietal_Sup)&(Temporal) | (Attention|Central_executive)&(Default_mode|Central_executive) |
| Edge (Functional connectivity) | Pheno1331 | Net100_Pair40_48 | (Frontal)&(Temporal) | (Central_executive)&(Default_mode|Central_executive) |
| Edge (Functional connectivity) | Pheno1332 | Net100_Pair41_48 | (Temporal|Occipital)&(Temporal) | (Attention|Visual)&(Default_mode|Central_executive) |
| Edge (Functional connectivity) | Pheno1333 | Net100_Pair42_48 | (Temporal|Occipital)&(Temporal) | (Attention|Visual)&(Default_mode|Central_executive) |
| Edge (Functional connectivity) | Pheno1334 | Net100_Pair43_48 | (Temporal|Fusiform)&(Temporal) | (Limbic|Default_mode)&(Default_mode|Central_executive) |
| Edge (Functional connectivity) | Pheno1335 | Net100_Pair44_48 | (Frontal_Inf)&(Temporal) | (Default_mode|Central_executive)&(Default_mode|Central_executive) |
| Edge (Functional connectivity) | Pheno1336 | Net100_Pair45_48 | (Frontal)&(Temporal) | (Salience|Default_mode)&(Default_mode|Central_executive) |
| Edge (Functional connectivity) | Pheno1337 | Net100_Pair46_48 | (Temporal)&(Temporal) | (Central_executive|Default_mode)&(Default_mode|Central_executive) |
| Edge (Functional connectivity) | Pheno1338 | Net100_Pair47_48 | (Frontal)&(Temporal) | (Central_executive|Salience|Default_mode)&(Default_mode|Central_executive) |
| Edge (Functional connectivity) | Pheno1339 | Net100_Pair1_49 | (Calcarine|Lingual|Cuneus)&(Temporal_Mid|Angular) | (Visual)&(Default_mode) |
| Edge (Functional connectivity) | Pheno1340 | Net100_Pair2_49 | (RolandicOper|SupraMarginal|Insula)&(Temporal_Mid|Angular) | (Salience|Motor)&(Default_mode) |
| Edge (Functional connectivity) | Pheno1341 | Net100_Pair3_49 | (Lingual|Fusiform)&(Temporal_Mid|Angular) | (Visual)&(Default_mode) |
| Edge (Functional connectivity) | Pheno1342 | Net100_Pair4_49 | (Occipital)&(Temporal_Mid|Angular) | (Attention|Visual)&(Default_mode) |
| Edge (Functional connectivity) | Pheno1343 | Net100_Pair5_49 | (Precuneus|Angular|Cingulate)&(Temporal_Mid|Angular) | (Default_mode|Central_executive)&(Default_mode) |
| Edge (Functional connectivity) | Pheno1344 | Net100_Pair6_49 | (Postcentral|Precentral)&(Temporal_Mid|Angular) | (Motor)&(Default_mode) |
| Edge (Functional connectivity) | Pheno1345 | Net100_Pair7_49 | (Frontal|Cingulate)&(Temporal_Mid|Angular) | (Default_mode|Limbic)&(Default_mode) |
| Edge (Functional connectivity) | Pheno1346 | Net100_Pair8_49 | (Calcarine|Lingual)&(Temporal_Mid|Angular) | (Visual)&(Default_mode) |
| Edge (Functional connectivity) | Pheno1347 | Net100_Pair9_49 | (Temporal)&(Temporal_Mid|Angular) | (Default_mode)&(Default_mode) |
| Edge (Functional connectivity) | Pheno1348 | Net100_Pair10_49 | (OccipitalPrecuneus)&(Temporal_Mid|Angular) | (Default_mode|Central_executive)&(Default_mode) |
| Edge (Functional connectivity) | Pheno1349 | Net100_Pair11_49 | (Angular|Temporal)&(Temporal_Mid|Angular) | (Default_mode|Central_executive)&(Default_mode) |
| Edge (Functional connectivity) | Pheno1350 | Net100_Pair12_49 | (Frontal|Cerebellum)&(Temporal_Mid|Angular) | (Central_executive|Default_mode)&(Default_mode) |
| Edge (Functional connectivity) | Pheno1351 | Net100_Pair13_49 | (Frontal_Sup)&(Temporal_Mid|Angular) | (Default_mode)&(Default_mode) |
| Edge (Functional connectivity) | Pheno1352 | Net100_Pair14_49 | (Cuneus|Occipital)&(Temporal_Mid|Angular) | (Visual)&(Default_mode) |
| Edge (Functional connectivity) | Pheno1353 | Net100_Pair15_49 | (Insula|Cingulate)&(Temporal_Mid|Angular) | (Salience|Default_mode)&(Default_mode) |
| Edge (Functional connectivity) | Pheno1354 | Net100_Pair16_49 | (Occipital)&(Temporal_Mid|Angular) | (Visual)&(Default_mode) |
| Edge (Functional connectivity) | Pheno1355 | Net100_Pair17_49 | (Cerebellum)&(Temporal_Mid|Angular) | (Subcortical-cerebellum)&(Default_mode) |
| Edge (Functional connectivity) | Pheno1356 | Net100_Pair18_49 | (Parietal)&(Temporal_Mid|Angular) | (Attention|Central_executive|Salience)&(Default_mode) |
| Edge (Functional connectivity) | Pheno1357 | Net100_Pair19_49 | (Precuneus|Cuneus|Cingulate)&(Temporal_Mid|Angular) | (Default_mode|Central_executive)&(Default_mode) |
| Edge (Functional connectivity) | Pheno1358 | Net100_Pair20_49 | (Postcentral|Precentral)&(Temporal_Mid|Angular) | (Motor|Attention)&(Default_mode) |
| Edge (Functional connectivity) | Pheno1359 | Net100_Pair21_49 | (Frontal_Sup)&(Temporal_Mid|Angular) | (Default_mode|Central_executive)&(Default_mode) |
| Edge (Functional connectivity) | Pheno1360 | Net100_Pair22_49 | (Temporal_Sup)&(Temporal_Mid|Angular) | (Default_mode|Motor)&(Default_mode) |
| Edge (Functional connectivity) | Pheno1361 | Net100_Pair23_49 | (Cerebellum)&(Temporal_Mid|Angular) | (Subcortical-cerebellum)&(Default_mode) |
| Edge (Functional connectivity) | Pheno1362 | Net100_Pair24_49 | (Parietal)&(Temporal_Mid|Angular) | (Central_executive|Attention)&(Default_mode) |
| Edge (Functional connectivity) | Pheno1363 | Net100_Pair25_49 | (Frontal|Precentral)&(Temporal_Mid|Angular) | (Central_executive)&(Default_mode) |
| Edge (Functional connectivity) | Pheno1364 | Net100_Pair26_49 | (Parietal|Frontal)&(Temporal_Mid|Angular) | (Attention|Central_executive)&(Default_mode) |
| Edge (Functional connectivity) | Pheno1365 | Net100_Pair27_49 | (Precentral|Frontal|Supp_Motor_Area)&(Temporal_Mid|Angular) | (Attention|Salience|Motor)&(Default_mode) |
| Edge (Functional connectivity) | Pheno1366 | Net100_Pair28_49 | (Supp_Motor_Area|Frontal)&(Temporal_Mid|Angular) | (Salience|Default_mode)&(Default_mode) |
| Edge (Functional connectivity) | Pheno1367 | Net100_Pair29_49 | (Parietal)&(Temporal_Mid|Angular) | (Central_executive|Salience)&(Default_mode) |
| Edge (Functional connectivity) | Pheno1368 | Net100_Pair30_49 | (Paracentral)&(Temporal_Mid|Angular) | (Motor)&(Default_mode) |
| Edge (Functional connectivity) | Pheno1369 | Net100_Pair31_49 | (Frontal)&(Temporal_Mid|Angular) | (Central_executive)&(Default_mode) |
| Edge (Functional connectivity) | Pheno1370 | Net100_Pair32_49 | (Postcentral|Precentral)&(Temporal_Mid|Angular) | (Motor|Attention)&(Default_mode) |
| Edge (Functional connectivity) | Pheno1371 | Net100_Pair33_49 | (Temporal|Frontal|Supp_Motor_Area)&(Temporal_Mid|Angular) | (Default_mode|Salience)&(Default_mode) |
| Edge (Functional connectivity) | Pheno1372 | Net100_Pair34_49 | (Parietal|Postcentral|Precuneus)&(Temporal_Mid|Angular) | (Attention)&(Default_mode) |
| Edge (Functional connectivity) | Pheno1373 | Net100_Pair35_49 | (Postcentral|Precentral)&(Temporal_Mid|Angular) | (Motor)&(Default_mode) |
| Edge (Functional connectivity) | Pheno1374 | Net100_Pair36_49 | (Precuneus)&(Temporal_Mid|Angular) | (Default_mode|Central_executive)&(Default_mode) |
| Edge (Functional connectivity) | Pheno1375 | Net100_Pair37_49 | (Frontal)&(Temporal_Mid|Angular) | (Central_executive|Salience)&(Default_mode) |
| Edge (Functional connectivity) | Pheno1376 | Net100_Pair38_49 | (Subcortical)&(Temporal_Mid|Angular) | (Subcortical-cerebellum)&(Default_mode) |
| Edge (Functional connectivity) | Pheno1377 | Net100_Pair39_49 | (Precuneus|Parietal_Sup)&(Temporal_Mid|Angular) | (Attention|Central_executive)&(Default_mode) |
| Edge (Functional connectivity) | Pheno1378 | Net100_Pair40_49 | (Frontal)&(Temporal_Mid|Angular) | (Central_executive)&(Default_mode) |
| Edge (Functional connectivity) | Pheno1379 | Net100_Pair41_49 | (Temporal|Occipital)&(Temporal_Mid|Angular) | (Attention|Visual)&(Default_mode) |
| Edge (Functional connectivity) | Pheno1380 | Net100_Pair42_49 | (Temporal|Occipital)&(Temporal_Mid|Angular) | (Attention|Visual)&(Default_mode) |
| Edge (Functional connectivity) | Pheno1381 | Net100_Pair43_49 | (Temporal|Fusiform)&(Temporal_Mid|Angular) | (Limbic|Default_mode)&(Default_mode) |
| Edge (Functional connectivity) | Pheno1382 | Net100_Pair44_49 | (Frontal_Inf)&(Temporal_Mid|Angular) | (Default_mode|Central_executive)&(Default_mode) |
| Edge (Functional connectivity) | Pheno1383 | Net100_Pair45_49 | (Frontal)&(Temporal_Mid|Angular) | (Salience|Default_mode)&(Default_mode) |
| Edge (Functional connectivity) | Pheno1384 | Net100_Pair46_49 | (Temporal)&(Temporal_Mid|Angular) | (Central_executive|Default_mode)&(Default_mode) |
| Edge (Functional connectivity) | Pheno1385 | Net100_Pair47_49 | (Frontal)&(Temporal_Mid|Angular) | (Central_executive|Salience|Default_mode)&(Default_mode) |
| Edge (Functional connectivity) | Pheno1386 | Net100_Pair48_49 | (Temporal)&(Temporal_Mid|Angular) | (Default_mode|Central_executive)&(Default_mode) |
| Edge (Functional connectivity) | Pheno1387 | Net100_Pair1_50 | (Calcarine|Lingual|Cuneus)&(Orbitofrontal) | (Visual)&(Limbic) |
| Edge (Functional connectivity) | Pheno1388 | Net100_Pair2_50 | (RolandicOper|SupraMarginal|Insula)&(Orbitofrontal) | (Salience|Motor)&(Limbic) |
| Edge (Functional connectivity) | Pheno1389 | Net100_Pair3_50 | (Lingual|Fusiform)&(Orbitofrontal) | (Visual)&(Limbic) |
| Edge (Functional connectivity) | Pheno1390 | Net100_Pair4_50 | (Occipital)&(Orbitofrontal) | (Attention|Visual)&(Limbic) |
| Edge (Functional connectivity) | Pheno1391 | Net100_Pair5_50 | (Precuneus|Angular|Cingulate)&(Orbitofrontal) | (Default_mode|Central_executive)&(Limbic) |
| Edge (Functional connectivity) | Pheno1392 | Net100_Pair6_50 | (Postcentral|Precentral)&(Orbitofrontal) | (Motor)&(Limbic) |
| Edge (Functional connectivity) | Pheno1393 | Net100_Pair7_50 | (Frontal|Cingulate)&(Orbitofrontal) | (Default_mode|Limbic)&(Limbic) |
| Edge (Functional connectivity) | Pheno1394 | Net100_Pair8_50 | (Calcarine|Lingual)&(Orbitofrontal) | (Visual)&(Limbic) |
| Edge (Functional connectivity) | Pheno1395 | Net100_Pair9_50 | (Temporal)&(Orbitofrontal) | (Default_mode)&(Limbic) |
| Edge (Functional connectivity) | Pheno1396 | Net100_Pair10_50 | (OccipitalPrecuneus)&(Orbitofrontal) | (Default_mode|Central_executive)&(Limbic) |
| Edge (Functional connectivity) | Pheno1397 | Net100_Pair11_50 | (Angular|Temporal)&(Orbitofrontal) | (Default_mode|Central_executive)&(Limbic) |
| Edge (Functional connectivity) | Pheno1398 | Net100_Pair12_50 | (Frontal|Cerebellum)&(Orbitofrontal) | (Central_executive|Default_mode)&(Limbic) |
| Edge (Functional connectivity) | Pheno1399 | Net100_Pair13_50 | (Frontal_Sup)&(Orbitofrontal) | (Default_mode)&(Limbic) |
| Edge (Functional connectivity) | Pheno1400 | Net100_Pair14_50 | (Cuneus|Occipital)&(Orbitofrontal) | (Visual)&(Limbic) |
| Edge (Functional connectivity) | Pheno1401 | Net100_Pair15_50 | (Insula|Cingulate)&(Orbitofrontal) | (Salience|Default_mode)&(Limbic) |
| Edge (Functional connectivity) | Pheno1402 | Net100_Pair16_50 | (Occipital)&(Orbitofrontal) | (Visual)&(Limbic) |
| Edge (Functional connectivity) | Pheno1403 | Net100_Pair17_50 | (Cerebellum)&(Orbitofrontal) | (Subcortical-cerebellum)&(Limbic) |
| Edge (Functional connectivity) | Pheno1404 | Net100_Pair18_50 | (Parietal)&(Orbitofrontal) | (Attention|Central_executive|Salience)&(Limbic) |
| Edge (Functional connectivity) | Pheno1405 | Net100_Pair19_50 | (Precuneus|Cuneus|Cingulate)&(Orbitofrontal) | (Default_mode|Central_executive)&(Limbic) |
| Edge (Functional connectivity) | Pheno1406 | Net100_Pair20_50 | (Postcentral|Precentral)&(Orbitofrontal) | (Motor|Attention)&(Limbic) |
| Edge (Functional connectivity) | Pheno1407 | Net100_Pair21_50 | (Frontal_Sup)&(Orbitofrontal) | (Default_mode|Central_executive)&(Limbic) |
| Edge (Functional connectivity) | Pheno1408 | Net100_Pair22_50 | (Temporal_Sup)&(Orbitofrontal) | (Default_mode|Motor)&(Limbic) |
| Edge (Functional connectivity) | Pheno1409 | Net100_Pair23_50 | (Cerebellum)&(Orbitofrontal) | (Subcortical-cerebellum)&(Limbic) |
| Edge (Functional connectivity) | Pheno1410 | Net100_Pair24_50 | (Parietal)&(Orbitofrontal) | (Central_executive|Attention)&(Limbic) |
| Edge (Functional connectivity) | Pheno1411 | Net100_Pair25_50 | (Frontal|Precentral)&(Orbitofrontal) | (Central_executive)&(Limbic) |
| Edge (Functional connectivity) | Pheno1412 | Net100_Pair26_50 | (Parietal|Frontal)&(Orbitofrontal) | (Attention|Central_executive)&(Limbic) |
| Edge (Functional connectivity) | Pheno1413 | Net100_Pair27_50 | (Precentral|Frontal|Supp_Motor_Area)&(Orbitofrontal) | (Attention|Salience|Motor)&(Limbic) |
| Edge (Functional connectivity) | Pheno1414 | Net100_Pair28_50 | (Supp_Motor_Area|Frontal)&(Orbitofrontal) | (Salience|Default_mode)&(Limbic) |
| Edge (Functional connectivity) | Pheno1415 | Net100_Pair29_50 | (Parietal)&(Orbitofrontal) | (Central_executive|Salience)&(Limbic) |
| Edge (Functional connectivity) | Pheno1416 | Net100_Pair30_50 | (Paracentral)&(Orbitofrontal) | (Motor)&(Limbic) |
| Edge (Functional connectivity) | Pheno1417 | Net100_Pair31_50 | (Frontal)&(Orbitofrontal) | (Central_executive)&(Limbic) |
| Edge (Functional connectivity) | Pheno1418 | Net100_Pair32_50 | (Postcentral|Precentral)&(Orbitofrontal) | (Motor|Attention)&(Limbic) |
| Edge (Functional connectivity) | Pheno1419 | Net100_Pair33_50 | (Temporal|Frontal|Supp_Motor_Area)&(Orbitofrontal) | (Default_mode|Salience)&(Limbic) |
| Edge (Functional connectivity) | Pheno1420 | Net100_Pair34_50 | (Parietal|Postcentral|Precuneus)&(Orbitofrontal) | (Attention)&(Limbic) |
| Edge (Functional connectivity) | Pheno1421 | Net100_Pair35_50 | (Postcentral|Precentral)&(Orbitofrontal) | (Motor)&(Limbic) |
| Edge (Functional connectivity) | Pheno1422 | Net100_Pair36_50 | (Precuneus)&(Orbitofrontal) | (Default_mode|Central_executive)&(Limbic) |
| Edge (Functional connectivity) | Pheno1423 | Net100_Pair37_50 | (Frontal)&(Orbitofrontal) | (Central_executive|Salience)&(Limbic) |
| Edge (Functional connectivity) | Pheno1424 | Net100_Pair38_50 | (Subcortical)&(Orbitofrontal) | (Subcortical-cerebellum)&(Limbic) |
| Edge (Functional connectivity) | Pheno1425 | Net100_Pair39_50 | (Precuneus|Parietal_Sup)&(Orbitofrontal) | (Attention|Central_executive)&(Limbic) |
| Edge (Functional connectivity) | Pheno1426 | Net100_Pair40_50 | (Frontal)&(Orbitofrontal) | (Central_executive)&(Limbic) |
| Edge (Functional connectivity) | Pheno1427 | Net100_Pair41_50 | (Temporal|Occipital)&(Orbitofrontal) | (Attention|Visual)&(Limbic) |
| Edge (Functional connectivity) | Pheno1428 | Net100_Pair42_50 | (Temporal|Occipital)&(Orbitofrontal) | (Attention|Visual)&(Limbic) |
| Edge (Functional connectivity) | Pheno1429 | Net100_Pair43_50 | (Temporal|Fusiform)&(Orbitofrontal) | (Limbic|Default_mode)&(Limbic) |
| Edge (Functional connectivity) | Pheno1430 | Net100_Pair44_50 | (Frontal_Inf)&(Orbitofrontal) | (Default_mode|Central_executive)&(Limbic) |
| Edge (Functional connectivity) | Pheno1431 | Net100_Pair45_50 | (Frontal)&(Orbitofrontal) | (Salience|Default_mode)&(Limbic) |
| Edge (Functional connectivity) | Pheno1432 | Net100_Pair46_50 | (Temporal)&(Orbitofrontal) | (Central_executive|Default_mode)&(Limbic) |
| Edge (Functional connectivity) | Pheno1433 | Net100_Pair47_50 | (Frontal)&(Orbitofrontal) | (Central_executive|Salience|Default_mode)&(Limbic) |
| Edge (Functional connectivity) | Pheno1434 | Net100_Pair48_50 | (Temporal)&(Orbitofrontal) | (Default_mode|Central_executive)&(Limbic) |
| Edge (Functional connectivity) | Pheno1435 | Net100_Pair49_50 | (Temporal_Mid|Angular)&(Orbitofrontal) | (Default_mode)&(Limbic) |
| Edge (Functional connectivity) | Pheno1436 | Net100_Pair1_51 | (Calcarine|Lingual|Cuneus)&(Cerebellum|Temporal) | (Visual)&(Subcortical-cerebellum) |
| Edge (Functional connectivity) | Pheno1437 | Net100_Pair2_51 | (RolandicOper|SupraMarginal|Insula)&(Cerebellum|Temporal) | (Salience|Motor)&(Subcortical-cerebellum) |
| Edge (Functional connectivity) | Pheno1438 | Net100_Pair3_51 | (Lingual|Fusiform)&(Cerebellum|Temporal) | (Visual)&(Subcortical-cerebellum) |
| Edge (Functional connectivity) | Pheno1439 | Net100_Pair4_51 | (Occipital)&(Cerebellum|Temporal) | (Attention|Visual)&(Subcortical-cerebellum) |
| Edge (Functional connectivity) | Pheno1440 | Net100_Pair5_51 | (Precuneus|Angular|Cingulate)&(Cerebellum|Temporal) | (Default_mode|Central_executive)&(Subcortical-cerebellum) |
| Edge (Functional connectivity) | Pheno1441 | Net100_Pair6_51 | (Postcentral|Precentral)&(Cerebellum|Temporal) | (Motor)&(Subcortical-cerebellum) |
| Edge (Functional connectivity) | Pheno1442 | Net100_Pair7_51 | (Frontal|Cingulate)&(Cerebellum|Temporal) | (Default_mode|Limbic)&(Subcortical-cerebellum) |
| Edge (Functional connectivity) | Pheno1443 | Net100_Pair8_51 | (Calcarine|Lingual)&(Cerebellum|Temporal) | (Visual)&(Subcortical-cerebellum) |
| Edge (Functional connectivity) | Pheno1444 | Net100_Pair9_51 | (Temporal)&(Cerebellum|Temporal) | (Default_mode)&(Subcortical-cerebellum) |
| Edge (Functional connectivity) | Pheno1445 | Net100_Pair10_51 | (OccipitalPrecuneus)&(Cerebellum|Temporal) | (Default_mode|Central_executive)&(Subcortical-cerebellum) |
| Edge (Functional connectivity) | Pheno1446 | Net100_Pair11_51 | (Angular|Temporal)&(Cerebellum|Temporal) | (Default_mode|Central_executive)&(Subcortical-cerebellum) |
| Edge (Functional connectivity) | Pheno1447 | Net100_Pair12_51 | (Frontal|Cerebellum)&(Cerebellum|Temporal) | (Central_executive|Default_mode)&(Subcortical-cerebellum) |
| Edge (Functional connectivity) | Pheno1448 | Net100_Pair13_51 | (Frontal_Sup)&(Cerebellum|Temporal) | (Default_mode)&(Subcortical-cerebellum) |
| Edge (Functional connectivity) | Pheno1449 | Net100_Pair14_51 | (Cuneus|Occipital)&(Cerebellum|Temporal) | (Visual)&(Subcortical-cerebellum) |
| Edge (Functional connectivity) | Pheno1450 | Net100_Pair15_51 | (Insula|Cingulate)&(Cerebellum|Temporal) | (Salience|Default_mode)&(Subcortical-cerebellum) |
| Edge (Functional connectivity) | Pheno1451 | Net100_Pair16_51 | (Occipital)&(Cerebellum|Temporal) | (Visual)&(Subcortical-cerebellum) |
| Edge (Functional connectivity) | Pheno1452 | Net100_Pair17_51 | (Cerebellum)&(Cerebellum|Temporal) | (Subcortical-cerebellum)&(Subcortical-cerebellum) |
| Edge (Functional connectivity) | Pheno1453 | Net100_Pair18_51 | (Parietal)&(Cerebellum|Temporal) | (Attention|Central_executive|Salience)&(Subcortical-cerebellum) |
| Edge (Functional connectivity) | Pheno1454 | Net100_Pair19_51 | (Precuneus|Cuneus|Cingulate)&(Cerebellum|Temporal) | (Default_mode|Central_executive)&(Subcortical-cerebellum) |
| Edge (Functional connectivity) | Pheno1455 | Net100_Pair20_51 | (Postcentral|Precentral)&(Cerebellum|Temporal) | (Motor|Attention)&(Subcortical-cerebellum) |
| Edge (Functional connectivity) | Pheno1456 | Net100_Pair21_51 | (Frontal_Sup)&(Cerebellum|Temporal) | (Default_mode|Central_executive)&(Subcortical-cerebellum) |
| Edge (Functional connectivity) | Pheno1457 | Net100_Pair22_51 | (Temporal_Sup)&(Cerebellum|Temporal) | (Default_mode|Motor)&(Subcortical-cerebellum) |
| Edge (Functional connectivity) | Pheno1458 | Net100_Pair23_51 | (Cerebellum)&(Cerebellum|Temporal) | (Subcortical-cerebellum)&(Subcortical-cerebellum) |
| Edge (Functional connectivity) | Pheno1459 | Net100_Pair24_51 | (Parietal)&(Cerebellum|Temporal) | (Central_executive|Attention)&(Subcortical-cerebellum) |
| Edge (Functional connectivity) | Pheno1460 | Net100_Pair25_51 | (Frontal|Precentral)&(Cerebellum|Temporal) | (Central_executive)&(Subcortical-cerebellum) |
| Edge (Functional connectivity) | Pheno1461 | Net100_Pair26_51 | (Parietal|Frontal)&(Cerebellum|Temporal) | (Attention|Central_executive)&(Subcortical-cerebellum) |
| Edge (Functional connectivity) | Pheno1462 | Net100_Pair27_51 | (Precentral|Frontal|Supp_Motor_Area)&(Cerebellum|Temporal) | (Attention|Salience|Motor)&(Subcortical-cerebellum) |
| Edge (Functional connectivity) | Pheno1463 | Net100_Pair28_51 | (Supp_Motor_Area|Frontal)&(Cerebellum|Temporal) | (Salience|Default_mode)&(Subcortical-cerebellum) |
| Edge (Functional connectivity) | Pheno1464 | Net100_Pair29_51 | (Parietal)&(Cerebellum|Temporal) | (Central_executive|Salience)&(Subcortical-cerebellum) |
| Edge (Functional connectivity) | Pheno1465 | Net100_Pair30_51 | (Paracentral)&(Cerebellum|Temporal) | (Motor)&(Subcortical-cerebellum) |
| Edge (Functional connectivity) | Pheno1466 | Net100_Pair31_51 | (Frontal)&(Cerebellum|Temporal) | (Central_executive)&(Subcortical-cerebellum) |
| Edge (Functional connectivity) | Pheno1467 | Net100_Pair32_51 | (Postcentral|Precentral)&(Cerebellum|Temporal) | (Motor|Attention)&(Subcortical-cerebellum) |
| Edge (Functional connectivity) | Pheno1468 | Net100_Pair33_51 | (Temporal|Frontal|Supp_Motor_Area)&(Cerebellum|Temporal) | (Default_mode|Salience)&(Subcortical-cerebellum) |
| Edge (Functional connectivity) | Pheno1469 | Net100_Pair34_51 | (Parietal|Postcentral|Precuneus)&(Cerebellum|Temporal) | (Attention)&(Subcortical-cerebellum) |
| Edge (Functional connectivity) | Pheno1470 | Net100_Pair35_51 | (Postcentral|Precentral)&(Cerebellum|Temporal) | (Motor)&(Subcortical-cerebellum) |
| Edge (Functional connectivity) | Pheno1471 | Net100_Pair36_51 | (Precuneus)&(Cerebellum|Temporal) | (Default_mode|Central_executive)&(Subcortical-cerebellum) |
| Edge (Functional connectivity) | Pheno1472 | Net100_Pair37_51 | (Frontal)&(Cerebellum|Temporal) | (Central_executive|Salience)&(Subcortical-cerebellum) |
| Edge (Functional connectivity) | Pheno1473 | Net100_Pair38_51 | (Subcortical)&(Cerebellum|Temporal) | (Subcortical-cerebellum)&(Subcortical-cerebellum) |
| Edge (Functional connectivity) | Pheno1474 | Net100_Pair39_51 | (Precuneus|Parietal_Sup)&(Cerebellum|Temporal) | (Attention|Central_executive)&(Subcortical-cerebellum) |
| Edge (Functional connectivity) | Pheno1475 | Net100_Pair40_51 | (Frontal)&(Cerebellum|Temporal) | (Central_executive)&(Subcortical-cerebellum) |
| Edge (Functional connectivity) | Pheno1476 | Net100_Pair41_51 | (Temporal|Occipital)&(Cerebellum|Temporal) | (Attention|Visual)&(Subcortical-cerebellum) |
| Edge (Functional connectivity) | Pheno1477 | Net100_Pair42_51 | (Temporal|Occipital)&(Cerebellum|Temporal) | (Attention|Visual)&(Subcortical-cerebellum) |
| Edge (Functional connectivity) | Pheno1478 | Net100_Pair43_51 | (Temporal|Fusiform)&(Cerebellum|Temporal) | (Limbic|Default_mode)&(Subcortical-cerebellum) |
| Edge (Functional connectivity) | Pheno1479 | Net100_Pair44_51 | (Frontal_Inf)&(Cerebellum|Temporal) | (Default_mode|Central_executive)&(Subcortical-cerebellum) |
| Edge (Functional connectivity) | Pheno1480 | Net100_Pair45_51 | (Frontal)&(Cerebellum|Temporal) | (Salience|Default_mode)&(Subcortical-cerebellum) |
| Edge (Functional connectivity) | Pheno1481 | Net100_Pair46_51 | (Temporal)&(Cerebellum|Temporal) | (Central_executive|Default_mode)&(Subcortical-cerebellum) |
| Edge (Functional connectivity) | Pheno1482 | Net100_Pair47_51 | (Frontal)&(Cerebellum|Temporal) | (Central_executive|Salience|Default_mode)&(Subcortical-cerebellum) |
| Edge (Functional connectivity) | Pheno1483 | Net100_Pair48_51 | (Temporal)&(Cerebellum|Temporal) | (Default_mode|Central_executive)&(Subcortical-cerebellum) |
| Edge (Functional connectivity) | Pheno1484 | Net100_Pair49_51 | (Temporal_Mid|Angular)&(Cerebellum|Temporal) | (Default_mode)&(Subcortical-cerebellum) |
| Edge (Functional connectivity) | Pheno1485 | Net100_Pair50_51 | (Orbitofrontal)&(Cerebellum|Temporal) | (Limbic)&(Subcortical-cerebellum) |
| Edge (Functional connectivity) | Pheno1486 | Net100_Pair1_52 | (Calcarine|Lingual|Cuneus)&(Cerebellum|Temporal) | (Visual)&(Subcortical-cerebellum) |
| Edge (Functional connectivity) | Pheno1487 | Net100_Pair2_52 | (RolandicOper|SupraMarginal|Insula)&(Cerebellum|Temporal) | (Salience|Motor)&(Subcortical-cerebellum) |
| Edge (Functional connectivity) | Pheno1488 | Net100_Pair3_52 | (Lingual|Fusiform)&(Cerebellum|Temporal) | (Visual)&(Subcortical-cerebellum) |
| Edge (Functional connectivity) | Pheno1489 | Net100_Pair4_52 | (Occipital)&(Cerebellum|Temporal) | (Attention|Visual)&(Subcortical-cerebellum) |
| Edge (Functional connectivity) | Pheno1490 | Net100_Pair5_52 | (Precuneus|Angular|Cingulate)&(Cerebellum|Temporal) | (Default_mode|Central_executive)&(Subcortical-cerebellum) |
| Edge (Functional connectivity) | Pheno1491 | Net100_Pair6_52 | (Postcentral|Precentral)&(Cerebellum|Temporal) | (Motor)&(Subcortical-cerebellum) |
| Edge (Functional connectivity) | Pheno1492 | Net100_Pair7_52 | (Frontal|Cingulate)&(Cerebellum|Temporal) | (Default_mode|Limbic)&(Subcortical-cerebellum) |
| Edge (Functional connectivity) | Pheno1493 | Net100_Pair8_52 | (Calcarine|Lingual)&(Cerebellum|Temporal) | (Visual)&(Subcortical-cerebellum) |
| Edge (Functional connectivity) | Pheno1494 | Net100_Pair9_52 | (Temporal)&(Cerebellum|Temporal) | (Default_mode)&(Subcortical-cerebellum) |
| Edge (Functional connectivity) | Pheno1495 | Net100_Pair10_52 | (OccipitalPrecuneus)&(Cerebellum|Temporal) | (Default_mode|Central_executive)&(Subcortical-cerebellum) |
| Edge (Functional connectivity) | Pheno1496 | Net100_Pair11_52 | (Angular|Temporal)&(Cerebellum|Temporal) | (Default_mode|Central_executive)&(Subcortical-cerebellum) |
| Edge (Functional connectivity) | Pheno1497 | Net100_Pair12_52 | (Frontal|Cerebellum)&(Cerebellum|Temporal) | (Central_executive|Default_mode)&(Subcortical-cerebellum) |
| Edge (Functional connectivity) | Pheno1498 | Net100_Pair13_52 | (Frontal_Sup)&(Cerebellum|Temporal) | (Default_mode)&(Subcortical-cerebellum) |
| Edge (Functional connectivity) | Pheno1499 | Net100_Pair14_52 | (Cuneus|Occipital)&(Cerebellum|Temporal) | (Visual)&(Subcortical-cerebellum) |
| Edge (Functional connectivity) | Pheno1500 | Net100_Pair15_52 | (Insula|Cingulate)&(Cerebellum|Temporal) | (Salience|Default_mode)&(Subcortical-cerebellum) |
| Edge (Functional connectivity) | Pheno1501 | Net100_Pair16_52 | (Occipital)&(Cerebellum|Temporal) | (Visual)&(Subcortical-cerebellum) |
| Edge (Functional connectivity) | Pheno1502 | Net100_Pair17_52 | (Cerebellum)&(Cerebellum|Temporal) | (Subcortical-cerebellum)&(Subcortical-cerebellum) |
| Edge (Functional connectivity) | Pheno1503 | Net100_Pair18_52 | (Parietal)&(Cerebellum|Temporal) | (Attention|Central_executive|Salience)&(Subcortical-cerebellum) |
| Edge (Functional connectivity) | Pheno1504 | Net100_Pair19_52 | (Precuneus|Cuneus|Cingulate)&(Cerebellum|Temporal) | (Default_mode|Central_executive)&(Subcortical-cerebellum) |
| Edge (Functional connectivity) | Pheno1505 | Net100_Pair20_52 | (Postcentral|Precentral)&(Cerebellum|Temporal) | (Motor|Attention)&(Subcortical-cerebellum) |
| Edge (Functional connectivity) | Pheno1506 | Net100_Pair21_52 | (Frontal_Sup)&(Cerebellum|Temporal) | (Default_mode|Central_executive)&(Subcortical-cerebellum) |
| Edge (Functional connectivity) | Pheno1507 | Net100_Pair22_52 | (Temporal_Sup)&(Cerebellum|Temporal) | (Default_mode|Motor)&(Subcortical-cerebellum) |
| Edge (Functional connectivity) | Pheno1508 | Net100_Pair23_52 | (Cerebellum)&(Cerebellum|Temporal) | (Subcortical-cerebellum)&(Subcortical-cerebellum) |
| Edge (Functional connectivity) | Pheno1509 | Net100_Pair24_52 | (Parietal)&(Cerebellum|Temporal) | (Central_executive|Attention)&(Subcortical-cerebellum) |
| Edge (Functional connectivity) | Pheno1510 | Net100_Pair25_52 | (Frontal|Precentral)&(Cerebellum|Temporal) | (Central_executive)&(Subcortical-cerebellum) |
| Edge (Functional connectivity) | Pheno1511 | Net100_Pair26_52 | (Parietal|Frontal)&(Cerebellum|Temporal) | (Attention|Central_executive)&(Subcortical-cerebellum) |
| Edge (Functional connectivity) | Pheno1512 | Net100_Pair27_52 | (Precentral|Frontal|Supp_Motor_Area)&(Cerebellum|Temporal) | (Attention|Salience|Motor)&(Subcortical-cerebellum) |
| Edge (Functional connectivity) | Pheno1513 | Net100_Pair28_52 | (Supp_Motor_Area|Frontal)&(Cerebellum|Temporal) | (Salience|Default_mode)&(Subcortical-cerebellum) |
| Edge (Functional connectivity) | Pheno1514 | Net100_Pair29_52 | (Parietal)&(Cerebellum|Temporal) | (Central_executive|Salience)&(Subcortical-cerebellum) |
| Edge (Functional connectivity) | Pheno1515 | Net100_Pair30_52 | (Paracentral)&(Cerebellum|Temporal) | (Motor)&(Subcortical-cerebellum) |
| Edge (Functional connectivity) | Pheno1516 | Net100_Pair31_52 | (Frontal)&(Cerebellum|Temporal) | (Central_executive)&(Subcortical-cerebellum) |
| Edge (Functional connectivity) | Pheno1517 | Net100_Pair32_52 | (Postcentral|Precentral)&(Cerebellum|Temporal) | (Motor|Attention)&(Subcortical-cerebellum) |
| Edge (Functional connectivity) | Pheno1518 | Net100_Pair33_52 | (Temporal|Frontal|Supp_Motor_Area)&(Cerebellum|Temporal) | (Default_mode|Salience)&(Subcortical-cerebellum) |
| Edge (Functional connectivity) | Pheno1519 | Net100_Pair34_52 | (Parietal|Postcentral|Precuneus)&(Cerebellum|Temporal) | (Attention)&(Subcortical-cerebellum) |
| Edge (Functional connectivity) | Pheno1520 | Net100_Pair35_52 | (Postcentral|Precentral)&(Cerebellum|Temporal) | (Motor)&(Subcortical-cerebellum) |
| Edge (Functional connectivity) | Pheno1521 | Net100_Pair36_52 | (Precuneus)&(Cerebellum|Temporal) | (Default_mode|Central_executive)&(Subcortical-cerebellum) |
| Edge (Functional connectivity) | Pheno1522 | Net100_Pair37_52 | (Frontal)&(Cerebellum|Temporal) | (Central_executive|Salience)&(Subcortical-cerebellum) |
| Edge (Functional connectivity) | Pheno1523 | Net100_Pair38_52 | (Subcortical)&(Cerebellum|Temporal) | (Subcortical-cerebellum)&(Subcortical-cerebellum) |
| Edge (Functional connectivity) | Pheno1524 | Net100_Pair39_52 | (Precuneus|Parietal_Sup)&(Cerebellum|Temporal) | (Attention|Central_executive)&(Subcortical-cerebellum) |
| Edge (Functional connectivity) | Pheno1525 | Net100_Pair40_52 | (Frontal)&(Cerebellum|Temporal) | (Central_executive)&(Subcortical-cerebellum) |
| Edge (Functional connectivity) | Pheno1526 | Net100_Pair41_52 | (Temporal|Occipital)&(Cerebellum|Temporal) | (Attention|Visual)&(Subcortical-cerebellum) |
| Edge (Functional connectivity) | Pheno1527 | Net100_Pair42_52 | (Temporal|Occipital)&(Cerebellum|Temporal) | (Attention|Visual)&(Subcortical-cerebellum) |
| Edge (Functional connectivity) | Pheno1528 | Net100_Pair43_52 | (Temporal|Fusiform)&(Cerebellum|Temporal) | (Limbic|Default_mode)&(Subcortical-cerebellum) |
| Edge (Functional connectivity) | Pheno1529 | Net100_Pair44_52 | (Frontal_Inf)&(Cerebellum|Temporal) | (Default_mode|Central_executive)&(Subcortical-cerebellum) |
| Edge (Functional connectivity) | Pheno1530 | Net100_Pair45_52 | (Frontal)&(Cerebellum|Temporal) | (Salience|Default_mode)&(Subcortical-cerebellum) |
| Edge (Functional connectivity) | Pheno1531 | Net100_Pair46_52 | (Temporal)&(Cerebellum|Temporal) | (Central_executive|Default_mode)&(Subcortical-cerebellum) |
| Edge (Functional connectivity) | Pheno1532 | Net100_Pair47_52 | (Frontal)&(Cerebellum|Temporal) | (Central_executive|Salience|Default_mode)&(Subcortical-cerebellum) |
| Edge (Functional connectivity) | Pheno1533 | Net100_Pair48_52 | (Temporal)&(Cerebellum|Temporal) | (Default_mode|Central_executive)&(Subcortical-cerebellum) |
| Edge (Functional connectivity) | Pheno1534 | Net100_Pair49_52 | (Temporal_Mid|Angular)&(Cerebellum|Temporal) | (Default_mode)&(Subcortical-cerebellum) |
| Edge (Functional connectivity) | Pheno1535 | Net100_Pair50_52 | (Orbitofrontal)&(Cerebellum|Temporal) | (Limbic)&(Subcortical-cerebellum) |
| Edge (Functional connectivity) | Pheno1536 | Net100_Pair51_52 | (Cerebellum|Temporal)&(Cerebellum|Temporal) | (Subcortical-cerebellum)&(Subcortical-cerebellum) |
| Edge (Functional connectivity) | Pheno1537 | Net100_Pair1_53 | (Calcarine|Lingual|Cuneus)&(Frontal) | (Visual)&(Limbic) |
| Edge (Functional connectivity) | Pheno1538 | Net100_Pair2_53 | (RolandicOper|SupraMarginal|Insula)&(Frontal) | (Salience|Motor)&(Limbic) |
| Edge (Functional connectivity) | Pheno1539 | Net100_Pair3_53 | (Lingual|Fusiform)&(Frontal) | (Visual)&(Limbic) |
| Edge (Functional connectivity) | Pheno1540 | Net100_Pair4_53 | (Occipital)&(Frontal) | (Attention|Visual)&(Limbic) |
| Edge (Functional connectivity) | Pheno1541 | Net100_Pair5_53 | (Precuneus|Angular|Cingulate)&(Frontal) | (Default_mode|Central_executive)&(Limbic) |
| Edge (Functional connectivity) | Pheno1542 | Net100_Pair6_53 | (Postcentral|Precentral)&(Frontal) | (Motor)&(Limbic) |
| Edge (Functional connectivity) | Pheno1543 | Net100_Pair7_53 | (Frontal|Cingulate)&(Frontal) | (Default_mode|Limbic)&(Limbic) |
| Edge (Functional connectivity) | Pheno1544 | Net100_Pair8_53 | (Calcarine|Lingual)&(Frontal) | (Visual)&(Limbic) |
| Edge (Functional connectivity) | Pheno1545 | Net100_Pair9_53 | (Temporal)&(Frontal) | (Default_mode)&(Limbic) |
| Edge (Functional connectivity) | Pheno1546 | Net100_Pair10_53 | (OccipitalPrecuneus)&(Frontal) | (Default_mode|Central_executive)&(Limbic) |
| Edge (Functional connectivity) | Pheno1547 | Net100_Pair11_53 | (Angular|Temporal)&(Frontal) | (Default_mode|Central_executive)&(Limbic) |
| Edge (Functional connectivity) | Pheno1548 | Net100_Pair12_53 | (Frontal|Cerebellum)&(Frontal) | (Central_executive|Default_mode)&(Limbic) |
| Edge (Functional connectivity) | Pheno1549 | Net100_Pair13_53 | (Frontal_Sup)&(Frontal) | (Default_mode)&(Limbic) |
| Edge (Functional connectivity) | Pheno1550 | Net100_Pair14_53 | (Cuneus|Occipital)&(Frontal) | (Visual)&(Limbic) |
| Edge (Functional connectivity) | Pheno1551 | Net100_Pair15_53 | (Insula|Cingulate)&(Frontal) | (Salience|Default_mode)&(Limbic) |
| Edge (Functional connectivity) | Pheno1552 | Net100_Pair16_53 | (Occipital)&(Frontal) | (Visual)&(Limbic) |
| Edge (Functional connectivity) | Pheno1553 | Net100_Pair17_53 | (Cerebellum)&(Frontal) | (Subcortical-cerebellum)&(Limbic) |
| Edge (Functional connectivity) | Pheno1554 | Net100_Pair18_53 | (Parietal)&(Frontal) | (Attention|Central_executive|Salience)&(Limbic) |
| Edge (Functional connectivity) | Pheno1555 | Net100_Pair19_53 | (Precuneus|Cuneus|Cingulate)&(Frontal) | (Default_mode|Central_executive)&(Limbic) |
| Edge (Functional connectivity) | Pheno1556 | Net100_Pair20_53 | (Postcentral|Precentral)&(Frontal) | (Motor|Attention)&(Limbic) |
| Edge (Functional connectivity) | Pheno1557 | Net100_Pair21_53 | (Frontal_Sup)&(Frontal) | (Default_mode|Central_executive)&(Limbic) |
| Edge (Functional connectivity) | Pheno1558 | Net100_Pair22_53 | (Temporal_Sup)&(Frontal) | (Default_mode|Motor)&(Limbic) |
| Edge (Functional connectivity) | Pheno1559 | Net100_Pair23_53 | (Cerebellum)&(Frontal) | (Subcortical-cerebellum)&(Limbic) |
| Edge (Functional connectivity) | Pheno1560 | Net100_Pair24_53 | (Parietal)&(Frontal) | (Central_executive|Attention)&(Limbic) |
| Edge (Functional connectivity) | Pheno1561 | Net100_Pair25_53 | (Frontal|Precentral)&(Frontal) | (Central_executive)&(Limbic) |
| Edge (Functional connectivity) | Pheno1562 | Net100_Pair26_53 | (Parietal|Frontal)&(Frontal) | (Attention|Central_executive)&(Limbic) |
| Edge (Functional connectivity) | Pheno1563 | Net100_Pair27_53 | (Precentral|Frontal|Supp_Motor_Area)&(Frontal) | (Attention|Salience|Motor)&(Limbic) |
| Edge (Functional connectivity) | Pheno1564 | Net100_Pair28_53 | (Supp_Motor_Area|Frontal)&(Frontal) | (Salience|Default_mode)&(Limbic) |
| Edge (Functional connectivity) | Pheno1565 | Net100_Pair29_53 | (Parietal)&(Frontal) | (Central_executive|Salience)&(Limbic) |
| Edge (Functional connectivity) | Pheno1566 | Net100_Pair30_53 | (Paracentral)&(Frontal) | (Motor)&(Limbic) |
| Edge (Functional connectivity) | Pheno1567 | Net100_Pair31_53 | (Frontal)&(Frontal) | (Central_executive)&(Limbic) |
| Edge (Functional connectivity) | Pheno1568 | Net100_Pair32_53 | (Postcentral|Precentral)&(Frontal) | (Motor|Attention)&(Limbic) |
| Edge (Functional connectivity) | Pheno1569 | Net100_Pair33_53 | (Temporal|Frontal|Supp_Motor_Area)&(Frontal) | (Default_mode|Salience)&(Limbic) |
| Edge (Functional connectivity) | Pheno1570 | Net100_Pair34_53 | (Parietal|Postcentral|Precuneus)&(Frontal) | (Attention)&(Limbic) |
| Edge (Functional connectivity) | Pheno1571 | Net100_Pair35_53 | (Postcentral|Precentral)&(Frontal) | (Motor)&(Limbic) |
| Edge (Functional connectivity) | Pheno1572 | Net100_Pair36_53 | (Precuneus)&(Frontal) | (Default_mode|Central_executive)&(Limbic) |
| Edge (Functional connectivity) | Pheno1573 | Net100_Pair37_53 | (Frontal)&(Frontal) | (Central_executive|Salience)&(Limbic) |
| Edge (Functional connectivity) | Pheno1574 | Net100_Pair38_53 | (Subcortical)&(Frontal) | (Subcortical-cerebellum)&(Limbic) |
| Edge (Functional connectivity) | Pheno1575 | Net100_Pair39_53 | (Precuneus|Parietal_Sup)&(Frontal) | (Attention|Central_executive)&(Limbic) |
| Edge (Functional connectivity) | Pheno1576 | Net100_Pair40_53 | (Frontal)&(Frontal) | (Central_executive)&(Limbic) |
| Edge (Functional connectivity) | Pheno1577 | Net100_Pair41_53 | (Temporal|Occipital)&(Frontal) | (Attention|Visual)&(Limbic) |
| Edge (Functional connectivity) | Pheno1578 | Net100_Pair42_53 | (Temporal|Occipital)&(Frontal) | (Attention|Visual)&(Limbic) |
| Edge (Functional connectivity) | Pheno1579 | Net100_Pair43_53 | (Temporal|Fusiform)&(Frontal) | (Limbic|Default_mode)&(Limbic) |
| Edge (Functional connectivity) | Pheno1580 | Net100_Pair44_53 | (Frontal_Inf)&(Frontal) | (Default_mode|Central_executive)&(Limbic) |
| Edge (Functional connectivity) | Pheno1581 | Net100_Pair45_53 | (Frontal)&(Frontal) | (Salience|Default_mode)&(Limbic) |
| Edge (Functional connectivity) | Pheno1582 | Net100_Pair46_53 | (Temporal)&(Frontal) | (Central_executive|Default_mode)&(Limbic) |
| Edge (Functional connectivity) | Pheno1583 | Net100_Pair47_53 | (Frontal)&(Frontal) | (Central_executive|Salience|Default_mode)&(Limbic) |
| Edge (Functional connectivity) | Pheno1584 | Net100_Pair48_53 | (Temporal)&(Frontal) | (Default_mode|Central_executive)&(Limbic) |
| Edge (Functional connectivity) | Pheno1585 | Net100_Pair49_53 | (Temporal_Mid|Angular)&(Frontal) | (Default_mode)&(Limbic) |
| Edge (Functional connectivity) | Pheno1586 | Net100_Pair50_53 | (Orbitofrontal)&(Frontal) | (Limbic)&(Limbic) |
| Edge (Functional connectivity) | Pheno1587 | Net100_Pair51_53 | (Cerebellum|Temporal)&(Frontal) | (Subcortical-cerebellum)&(Limbic) |
| Edge (Functional connectivity) | Pheno1588 | Net100_Pair52_53 | (Cerebellum|Temporal)&(Frontal) | (Subcortical-cerebellum)&(Limbic) |
| Edge (Functional connectivity) | Pheno1589 | Net100_Pair1_54 | (Calcarine|Lingual|Cuneus)&(Temporal|Orbitofrontal) | (Visual)&(Limbic) |
| Edge (Functional connectivity) | Pheno1590 | Net100_Pair2_54 | (RolandicOper|SupraMarginal|Insula)&(Temporal|Orbitofrontal) | (Salience|Motor)&(Limbic) |
| Edge (Functional connectivity) | Pheno1591 | Net100_Pair3_54 | (Lingual|Fusiform)&(Temporal|Orbitofrontal) | (Visual)&(Limbic) |
| Edge (Functional connectivity) | Pheno1592 | Net100_Pair4_54 | (Occipital)&(Temporal|Orbitofrontal) | (Attention|Visual)&(Limbic) |
| Edge (Functional connectivity) | Pheno1593 | Net100_Pair5_54 | (Precuneus|Angular|Cingulate)&(Temporal|Orbitofrontal) | (Default_mode|Central_executive)&(Limbic) |
| Edge (Functional connectivity) | Pheno1594 | Net100_Pair6_54 | (Postcentral|Precentral)&(Temporal|Orbitofrontal) | (Motor)&(Limbic) |
| Edge (Functional connectivity) | Pheno1595 | Net100_Pair7_54 | (Frontal|Cingulate)&(Temporal|Orbitofrontal) | (Default_mode|Limbic)&(Limbic) |
| Edge (Functional connectivity) | Pheno1596 | Net100_Pair8_54 | (Calcarine|Lingual)&(Temporal|Orbitofrontal) | (Visual)&(Limbic) |
| Edge (Functional connectivity) | Pheno1597 | Net100_Pair9_54 | (Temporal)&(Temporal|Orbitofrontal) | (Default_mode)&(Limbic) |
| Edge (Functional connectivity) | Pheno1598 | Net100_Pair10_54 | (OccipitalPrecuneus)&(Temporal|Orbitofrontal) | (Default_mode|Central_executive)&(Limbic) |
| Edge (Functional connectivity) | Pheno1599 | Net100_Pair11_54 | (Angular|Temporal)&(Temporal|Orbitofrontal) | (Default_mode|Central_executive)&(Limbic) |
| Edge (Functional connectivity) | Pheno1600 | Net100_Pair12_54 | (Frontal|Cerebellum)&(Temporal|Orbitofrontal) | (Central_executive|Default_mode)&(Limbic) |
| Edge (Functional connectivity) | Pheno1601 | Net100_Pair13_54 | (Frontal_Sup)&(Temporal|Orbitofrontal) | (Default_mode)&(Limbic) |
| Edge (Functional connectivity) | Pheno1602 | Net100_Pair14_54 | (Cuneus|Occipital)&(Temporal|Orbitofrontal) | (Visual)&(Limbic) |
| Edge (Functional connectivity) | Pheno1603 | Net100_Pair15_54 | (Insula|Cingulate)&(Temporal|Orbitofrontal) | (Salience|Default_mode)&(Limbic) |
| Edge (Functional connectivity) | Pheno1604 | Net100_Pair16_54 | (Occipital)&(Temporal|Orbitofrontal) | (Visual)&(Limbic) |
| Edge (Functional connectivity) | Pheno1605 | Net100_Pair17_54 | (Cerebellum)&(Temporal|Orbitofrontal) | (Subcortical-cerebellum)&(Limbic) |
| Edge (Functional connectivity) | Pheno1606 | Net100_Pair18_54 | (Parietal)&(Temporal|Orbitofrontal) | (Attention|Central_executive|Salience)&(Limbic) |
| Edge (Functional connectivity) | Pheno1607 | Net100_Pair19_54 | (Precuneus|Cuneus|Cingulate)&(Temporal|Orbitofrontal) | (Default_mode|Central_executive)&(Limbic) |
| Edge (Functional connectivity) | Pheno1608 | Net100_Pair20_54 | (Postcentral|Precentral)&(Temporal|Orbitofrontal) | (Motor|Attention)&(Limbic) |
| Edge (Functional connectivity) | Pheno1609 | Net100_Pair21_54 | (Frontal_Sup)&(Temporal|Orbitofrontal) | (Default_mode|Central_executive)&(Limbic) |
| Edge (Functional connectivity) | Pheno1610 | Net100_Pair22_54 | (Temporal_Sup)&(Temporal|Orbitofrontal) | (Default_mode|Motor)&(Limbic) |
| Edge (Functional connectivity) | Pheno1611 | Net100_Pair23_54 | (Cerebellum)&(Temporal|Orbitofrontal) | (Subcortical-cerebellum)&(Limbic) |
| Edge (Functional connectivity) | Pheno1612 | Net100_Pair24_54 | (Parietal)&(Temporal|Orbitofrontal) | (Central_executive|Attention)&(Limbic) |
| Edge (Functional connectivity) | Pheno1613 | Net100_Pair25_54 | (Frontal|Precentral)&(Temporal|Orbitofrontal) | (Central_executive)&(Limbic) |
| Edge (Functional connectivity) | Pheno1614 | Net100_Pair26_54 | (Parietal|Frontal)&(Temporal|Orbitofrontal) | (Attention|Central_executive)&(Limbic) |
| Edge (Functional connectivity) | Pheno1615 | Net100_Pair27_54 | (Precentral|Frontal|Supp_Motor_Area)&(Temporal|Orbitofrontal) | (Attention|Salience|Motor)&(Limbic) |
| Edge (Functional connectivity) | Pheno1616 | Net100_Pair28_54 | (Supp_Motor_Area|Frontal)&(Temporal|Orbitofrontal) | (Salience|Default_mode)&(Limbic) |
| Edge (Functional connectivity) | Pheno1617 | Net100_Pair29_54 | (Parietal)&(Temporal|Orbitofrontal) | (Central_executive|Salience)&(Limbic) |
| Edge (Functional connectivity) | Pheno1618 | Net100_Pair30_54 | (Paracentral)&(Temporal|Orbitofrontal) | (Motor)&(Limbic) |
| Edge (Functional connectivity) | Pheno1619 | Net100_Pair31_54 | (Frontal)&(Temporal|Orbitofrontal) | (Central_executive)&(Limbic) |
| Edge (Functional connectivity) | Pheno1620 | Net100_Pair32_54 | (Postcentral|Precentral)&(Temporal|Orbitofrontal) | (Motor|Attention)&(Limbic) |
| Edge (Functional connectivity) | Pheno1621 | Net100_Pair33_54 | (Temporal|Frontal|Supp_Motor_Area)&(Temporal|Orbitofrontal) | (Default_mode|Salience)&(Limbic) |
| Edge (Functional connectivity) | Pheno1622 | Net100_Pair34_54 | (Parietal|Postcentral|Precuneus)&(Temporal|Orbitofrontal) | (Attention)&(Limbic) |
| Edge (Functional connectivity) | Pheno1623 | Net100_Pair35_54 | (Postcentral|Precentral)&(Temporal|Orbitofrontal) | (Motor)&(Limbic) |
| Edge (Functional connectivity) | Pheno1624 | Net100_Pair36_54 | (Precuneus)&(Temporal|Orbitofrontal) | (Default_mode|Central_executive)&(Limbic) |
| Edge (Functional connectivity) | Pheno1625 | Net100_Pair37_54 | (Frontal)&(Temporal|Orbitofrontal) | (Central_executive|Salience)&(Limbic) |
| Edge (Functional connectivity) | Pheno1626 | Net100_Pair38_54 | (Subcortical)&(Temporal|Orbitofrontal) | (Subcortical-cerebellum)&(Limbic) |
| Edge (Functional connectivity) | Pheno1627 | Net100_Pair39_54 | (Precuneus|Parietal_Sup)&(Temporal|Orbitofrontal) | (Attention|Central_executive)&(Limbic) |
| Edge (Functional connectivity) | Pheno1628 | Net100_Pair40_54 | (Frontal)&(Temporal|Orbitofrontal) | (Central_executive)&(Limbic) |
| Edge (Functional connectivity) | Pheno1629 | Net100_Pair41_54 | (Temporal|Occipital)&(Temporal|Orbitofrontal) | (Attention|Visual)&(Limbic) |
| Edge (Functional connectivity) | Pheno1630 | Net100_Pair42_54 | (Temporal|Occipital)&(Temporal|Orbitofrontal) | (Attention|Visual)&(Limbic) |
| Edge (Functional connectivity) | Pheno1631 | Net100_Pair43_54 | (Temporal|Fusiform)&(Temporal|Orbitofrontal) | (Limbic|Default_mode)&(Limbic) |
| Edge (Functional connectivity) | Pheno1632 | Net100_Pair44_54 | (Frontal_Inf)&(Temporal|Orbitofrontal) | (Default_mode|Central_executive)&(Limbic) |
| Edge (Functional connectivity) | Pheno1633 | Net100_Pair45_54 | (Frontal)&(Temporal|Orbitofrontal) | (Salience|Default_mode)&(Limbic) |
| Edge (Functional connectivity) | Pheno1634 | Net100_Pair46_54 | (Temporal)&(Temporal|Orbitofrontal) | (Central_executive|Default_mode)&(Limbic) |
| Edge (Functional connectivity) | Pheno1635 | Net100_Pair47_54 | (Frontal)&(Temporal|Orbitofrontal) | (Central_executive|Salience|Default_mode)&(Limbic) |
| Edge (Functional connectivity) | Pheno1636 | Net100_Pair48_54 | (Temporal)&(Temporal|Orbitofrontal) | (Default_mode|Central_executive)&(Limbic) |
| Edge (Functional connectivity) | Pheno1637 | Net100_Pair49_54 | (Temporal_Mid|Angular)&(Temporal|Orbitofrontal) | (Default_mode)&(Limbic) |
| Edge (Functional connectivity) | Pheno1638 | Net100_Pair50_54 | (Orbitofrontal)&(Temporal|Orbitofrontal) | (Limbic)&(Limbic) |
| Edge (Functional connectivity) | Pheno1639 | Net100_Pair51_54 | (Cerebellum|Temporal)&(Temporal|Orbitofrontal) | (Subcortical-cerebellum)&(Limbic) |
| Edge (Functional connectivity) | Pheno1640 | Net100_Pair52_54 | (Cerebellum|Temporal)&(Temporal|Orbitofrontal) | (Subcortical-cerebellum)&(Limbic) |
| Edge (Functional connectivity) | Pheno1641 | Net100_Pair53_54 | (Frontal)&(Temporal|Orbitofrontal) | (Limbic)&(Limbic) |
| Edge (Functional connectivity) | Pheno1642 | Net100_Pair1_55 | (Calcarine|Lingual|Cuneus)&(Frontal_Sup) | (Visual)&(Limbic|Default_mode) |
| Edge (Functional connectivity) | Pheno1643 | Net100_Pair2_55 | (RolandicOper|SupraMarginal|Insula)&(Frontal_Sup) | (Salience|Motor)&(Limbic|Default_mode) |
| Edge (Functional connectivity) | Pheno1644 | Net100_Pair3_55 | (Lingual|Fusiform)&(Frontal_Sup) | (Visual)&(Limbic|Default_mode) |
| Edge (Functional connectivity) | Pheno1645 | Net100_Pair4_55 | (Occipital)&(Frontal_Sup) | (Attention|Visual)&(Limbic|Default_mode) |
| Edge (Functional connectivity) | Pheno1646 | Net100_Pair5_55 | (Precuneus|Angular|Cingulate)&(Frontal_Sup) | (Default_mode|Central_executive)&(Limbic|Default_mode) |
| Edge (Functional connectivity) | Pheno1647 | Net100_Pair6_55 | (Postcentral|Precentral)&(Frontal_Sup) | (Motor)&(Limbic|Default_mode) |
| Edge (Functional connectivity) | Pheno1648 | Net100_Pair7_55 | (Frontal|Cingulate)&(Frontal_Sup) | (Default_mode|Limbic)&(Limbic|Default_mode) |
| Edge (Functional connectivity) | Pheno1649 | Net100_Pair8_55 | (Calcarine|Lingual)&(Frontal_Sup) | (Visual)&(Limbic|Default_mode) |
| Edge (Functional connectivity) | Pheno1650 | Net100_Pair9_55 | (Temporal)&(Frontal_Sup) | (Default_mode)&(Limbic|Default_mode) |
| Edge (Functional connectivity) | Pheno1651 | Net100_Pair10_55 | (OccipitalPrecuneus)&(Frontal_Sup) | (Default_mode|Central_executive)&(Limbic|Default_mode) |
| Edge (Functional connectivity) | Pheno1652 | Net100_Pair11_55 | (Angular|Temporal)&(Frontal_Sup) | (Default_mode|Central_executive)&(Limbic|Default_mode) |
| Edge (Functional connectivity) | Pheno1653 | Net100_Pair12_55 | (Frontal|Cerebellum)&(Frontal_Sup) | (Central_executive|Default_mode)&(Limbic|Default_mode) |
| Edge (Functional connectivity) | Pheno1654 | Net100_Pair13_55 | (Frontal_Sup)&(Frontal_Sup) | (Default_mode)&(Limbic|Default_mode) |
| Edge (Functional connectivity) | Pheno1655 | Net100_Pair14_55 | (Cuneus|Occipital)&(Frontal_Sup) | (Visual)&(Limbic|Default_mode) |
| Edge (Functional connectivity) | Pheno1656 | Net100_Pair15_55 | (Insula|Cingulate)&(Frontal_Sup) | (Salience|Default_mode)&(Limbic|Default_mode) |
| Edge (Functional connectivity) | Pheno1657 | Net100_Pair16_55 | (Occipital)&(Frontal_Sup) | (Visual)&(Limbic|Default_mode) |
| Edge (Functional connectivity) | Pheno1658 | Net100_Pair17_55 | (Cerebellum)&(Frontal_Sup) | (Subcortical-cerebellum)&(Limbic|Default_mode) |
| Edge (Functional connectivity) | Pheno1659 | Net100_Pair18_55 | (Parietal)&(Frontal_Sup) | (Attention|Central_executive|Salience)&(Limbic|Default_mode) |
| Edge (Functional connectivity) | Pheno1660 | Net100_Pair19_55 | (Precuneus|Cuneus|Cingulate)&(Frontal_Sup) | (Default_mode|Central_executive)&(Limbic|Default_mode) |
| Edge (Functional connectivity) | Pheno1661 | Net100_Pair20_55 | (Postcentral|Precentral)&(Frontal_Sup) | (Motor|Attention)&(Limbic|Default_mode) |
| Edge (Functional connectivity) | Pheno1662 | Net100_Pair21_55 | (Frontal_Sup)&(Frontal_Sup) | (Default_mode|Central_executive)&(Limbic|Default_mode) |
| Edge (Functional connectivity) | Pheno1663 | Net100_Pair22_55 | (Temporal_Sup)&(Frontal_Sup) | (Default_mode|Motor)&(Limbic|Default_mode) |
| Edge (Functional connectivity) | Pheno1664 | Net100_Pair23_55 | (Cerebellum)&(Frontal_Sup) | (Subcortical-cerebellum)&(Limbic|Default_mode) |
| Edge (Functional connectivity) | Pheno1665 | Net100_Pair24_55 | (Parietal)&(Frontal_Sup) | (Central_executive|Attention)&(Limbic|Default_mode) |
| Edge (Functional connectivity) | Pheno1666 | Net100_Pair25_55 | (Frontal|Precentral)&(Frontal_Sup) | (Central_executive)&(Limbic|Default_mode) |
| Edge (Functional connectivity) | Pheno1667 | Net100_Pair26_55 | (Parietal|Frontal)&(Frontal_Sup) | (Attention|Central_executive)&(Limbic|Default_mode) |
| Edge (Functional connectivity) | Pheno1668 | Net100_Pair27_55 | (Precentral|Frontal|Supp_Motor_Area)&(Frontal_Sup) | (Attention|Salience|Motor)&(Limbic|Default_mode) |
| Edge (Functional connectivity) | Pheno1669 | Net100_Pair28_55 | (Supp_Motor_Area|Frontal)&(Frontal_Sup) | (Salience|Default_mode)&(Limbic|Default_mode) |
| Edge (Functional connectivity) | Pheno1670 | Net100_Pair29_55 | (Parietal)&(Frontal_Sup) | (Central_executive|Salience)&(Limbic|Default_mode) |
| Edge (Functional connectivity) | Pheno1671 | Net100_Pair30_55 | (Paracentral)&(Frontal_Sup) | (Motor)&(Limbic|Default_mode) |
| Edge (Functional connectivity) | Pheno1672 | Net100_Pair31_55 | (Frontal)&(Frontal_Sup) | (Central_executive)&(Limbic|Default_mode) |
| Edge (Functional connectivity) | Pheno1673 | Net100_Pair32_55 | (Postcentral|Precentral)&(Frontal_Sup) | (Motor|Attention)&(Limbic|Default_mode) |
| Edge (Functional connectivity) | Pheno1674 | Net100_Pair33_55 | (Temporal|Frontal|Supp_Motor_Area)&(Frontal_Sup) | (Default_mode|Salience)&(Limbic|Default_mode) |
| Edge (Functional connectivity) | Pheno1675 | Net100_Pair34_55 | (Parietal|Postcentral|Precuneus)&(Frontal_Sup) | (Attention)&(Limbic|Default_mode) |
| Edge (Functional connectivity) | Pheno1676 | Net100_Pair35_55 | (Postcentral|Precentral)&(Frontal_Sup) | (Motor)&(Limbic|Default_mode) |
| Edge (Functional connectivity) | Pheno1677 | Net100_Pair36_55 | (Precuneus)&(Frontal_Sup) | (Default_mode|Central_executive)&(Limbic|Default_mode) |
| Edge (Functional connectivity) | Pheno1678 | Net100_Pair37_55 | (Frontal)&(Frontal_Sup) | (Central_executive|Salience)&(Limbic|Default_mode) |
| Edge (Functional connectivity) | Pheno1679 | Net100_Pair38_55 | (Subcortical)&(Frontal_Sup) | (Subcortical-cerebellum)&(Limbic|Default_mode) |
| Edge (Functional connectivity) | Pheno1680 | Net100_Pair39_55 | (Precuneus|Parietal_Sup)&(Frontal_Sup) | (Attention|Central_executive)&(Limbic|Default_mode) |
| Edge (Functional connectivity) | Pheno1681 | Net100_Pair40_55 | (Frontal)&(Frontal_Sup) | (Central_executive)&(Limbic|Default_mode) |
| Edge (Functional connectivity) | Pheno1682 | Net100_Pair41_55 | (Temporal|Occipital)&(Frontal_Sup) | (Attention|Visual)&(Limbic|Default_mode) |
| Edge (Functional connectivity) | Pheno1683 | Net100_Pair42_55 | (Temporal|Occipital)&(Frontal_Sup) | (Attention|Visual)&(Limbic|Default_mode) |
| Edge (Functional connectivity) | Pheno1684 | Net100_Pair43_55 | (Temporal|Fusiform)&(Frontal_Sup) | (Limbic|Default_mode)&(Limbic|Default_mode) |
| Edge (Functional connectivity) | Pheno1685 | Net100_Pair44_55 | (Frontal_Inf)&(Frontal_Sup) | (Default_mode|Central_executive)&(Limbic|Default_mode) |
| Edge (Functional connectivity) | Pheno1686 | Net100_Pair45_55 | (Frontal)&(Frontal_Sup) | (Salience|Default_mode)&(Limbic|Default_mode) |
| Edge (Functional connectivity) | Pheno1687 | Net100_Pair46_55 | (Temporal)&(Frontal_Sup) | (Central_executive|Default_mode)&(Limbic|Default_mode) |
| Edge (Functional connectivity) | Pheno1688 | Net100_Pair47_55 | (Frontal)&(Frontal_Sup) | (Central_executive|Salience|Default_mode)&(Limbic|Default_mode) |
| Edge (Functional connectivity) | Pheno1689 | Net100_Pair48_55 | (Temporal)&(Frontal_Sup) | (Default_mode|Central_executive)&(Limbic|Default_mode) |
| Edge (Functional connectivity) | Pheno1690 | Net100_Pair49_55 | (Temporal_Mid|Angular)&(Frontal_Sup) | (Default_mode)&(Limbic|Default_mode) |
| Edge (Functional connectivity) | Pheno1691 | Net100_Pair50_55 | (Orbitofrontal)&(Frontal_Sup) | (Limbic)&(Limbic|Default_mode) |
| Edge (Functional connectivity) | Pheno1692 | Net100_Pair51_55 | (Cerebellum|Temporal)&(Frontal_Sup) | (Subcortical-cerebellum)&(Limbic|Default_mode) |
| Edge (Functional connectivity) | Pheno1693 | Net100_Pair52_55 | (Cerebellum|Temporal)&(Frontal_Sup) | (Subcortical-cerebellum)&(Limbic|Default_mode) |
| Edge (Functional connectivity) | Pheno1694 | Net100_Pair53_55 | (Frontal)&(Frontal_Sup) | (Limbic)&(Limbic|Default_mode) |
| Edge (Functional connectivity) | Pheno1695 | Net100_Pair54_55 | (Temporal|Orbitofrontal)&(Frontal_Sup) | (Limbic)&(Limbic|Default_mode) |
| Edge (Functional connectivity) | Pheno1696 | Net_Edge_ICA1 | NA(Global_measure) | Motor|Subcortical-cerebellum |
| Edge (Functional connectivity) | Pheno1697 | Net_Edge_ICA2 | NA(Global_measure) | Triple_netwoks(Default_mode,Central_executive,Salience) |
| Edge (Functional connectivity) | Pheno1698 | Net_Edge_ICA3 | NA(Global_measure) | Triple_netwoks(Default_mode,Central_executive,Salience)|Attention |
| Edge (Functional connectivity) | Pheno1699 | Net_Edge_ICA4 | NA(Global_measure) | Triple_netwoks(Default_mode,Central_executive,Salience)|Attention |
| Edge (Functional connectivity) | Pheno1700 | Net_Edge_ICA5 | NA(Global_measure) | Visual|Attention |
| Edge (Functional connectivity) | Pheno1701 | Net_Edge_ICA6 | NA(Global_measure) | Triple_netwoks(Default_mode,Central_executive,Salience) |
| Node (Amplitude) | Pheno1 | Net25_Node1 | Cerebellum|Precuneus | Default_mode |
| Node (Amplitude) | Pheno2 | Net25_Node2 | Occipital | Visual|Attention |
| Node (Amplitude) | Pheno3 | Net25_Node3 | Pariental | Attention|Salience|Central_executive |
| Node (Amplitude) | Pheno4 | Net25_Node4 | Calcarine|Lingual|Cuneus | Visual |
| Node (Amplitude) | Pheno5 | Net25_Node5 | Parietal|Cerebellum | Central_executive|Attention|Default_mode |
| Node (Amplitude) | Pheno6 | Net25_Node6 | Frontal | Default_mode|Central_executive |
| Node (Amplitude) | Pheno7 | Net25_Node7 | Precuneus|Occipital | Default_mode|Central_executive |
| Node (Amplitude) | Pheno8 | Net25_Node8 | Occipital | Visual |
| Node (Amplitude) | Pheno9 | Net25_Node9 | Parietal|Temporal | Default_mode|Central_executive |
| Node (Amplitude) | Pheno10 | Net25_Node10 | Postcentral|Precentral | Motor |
| Node (Amplitude) | Pheno11 | Net25_Node11 | Postcentral|Precentral | Motor |
| Node (Amplitude) | Pheno12 | Net25_Node12 | Paracentral|Postcentral | Motor |
| Node (Amplitude) | Pheno13 | Net25_Node13 | Frontal|Supp_Motor_Area|Temporal | Default_mode|Salience |
| Node (Amplitude) | Pheno14 | Net25_Node14 | Cingulate|Frontal | Default_mode|Central_executive|Salience |
| Node (Amplitude) | Pheno15 | Net25_Node15 | Cerebellum | Subcortical-cerebellum |
| Node (Amplitude) | Pheno16 | Net25_Node16 | Frontal | Salience|Central_executive |
| Node (Amplitude) | Pheno17 | Net25_Node17 | Temporal | Default_mode|Motor |
| Node (Amplitude) | Pheno18 | Net25_Node18 | Subcortical | Subcortical-cerebellum |
| Node (Amplitude) | Pheno19 | Net25_Node19 | Occipital | Visual |
| Node (Amplitude) | Pheno20 | Net25_Node20 | Precuneus|Cingulate | Default_mode|Central_executive |
| Node (Amplitude) | Pheno21 | Net25_Node21 | Frontal | Default_mode|Central_executive |
| Node (Amplitude) | Pheno22 | Net100_Node1 | Calcarine|Lingual|Cuneus | Visual |
| Node (Amplitude) | Pheno23 | Net100_Node2 | RolandicOper|SupraMarginal|Insula | Salience|Motor |
| Node (Amplitude) | Pheno24 | Net100_Node3 | Lingual|Fusiform | Visual |
| Node (Amplitude) | Pheno25 | Net100_Node4 | Occipital | Attention|Visual |
| Node (Amplitude) | Pheno26 | Net100_Node5 | Precuneus|Angular|Cingulate | Default_mode|Central_executive |
| Node (Amplitude) | Pheno27 | Net100_Node6 | Postcentral|Precentral | Motor |
| Node (Amplitude) | Pheno28 | Net100_Node7 | Frontal|Cingulate | Default_mode|Limbic |
| Node (Amplitude) | Pheno29 | Net100_Node8 | Calcarine|Lingual | Visual |
| Node (Amplitude) | Pheno30 | Net100_Node9 | Temporal | Default_mode |
| Node (Amplitude) | Pheno31 | Net100_Node10 | OccipitalPrecuneus | Default_mode|Central_executive |
| Node (Amplitude) | Pheno32 | Net100_Node11 | Angular|Temporal | Default_mode|Central_executive |
| Node (Amplitude) | Pheno33 | Net100_Node12 | Frontal|Cerebellum | Central_executive|Default_mode |
| Node (Amplitude) | Pheno34 | Net100_Node13 | Frontal_Sup | Default_mode |
| Node (Amplitude) | Pheno35 | Net100_Node14 | Cuneus|Occipital | Visual |
| Node (Amplitude) | Pheno36 | Net100_Node15 | Insula|Cingulate | Salience|Default_mode |
| Node (Amplitude) | Pheno37 | Net100_Node16 | Occipital | Visual |
| Node (Amplitude) | Pheno38 | Net100_Node17 | Cerebellum | Subcortical-cerebellum |
| Node (Amplitude) | Pheno39 | Net100_Node18 | Parietal | Attention|Central_executive|Salience |
| Node (Amplitude) | Pheno40 | Net100_Node19 | Precuneus|Cuneus|Cingulate | Default_mode|Central_executive |
| Node (Amplitude) | Pheno41 | Net100_Node20 | Postcentral|Precentral | Motor|Attention |
| Node (Amplitude) | Pheno42 | Net100_Node21 | Frontal_Sup | Default_mode|Central_executive |
| Node (Amplitude) | Pheno43 | Net100_Node22 | Temporal_Sup | Default_mode|Motor |
| Node (Amplitude) | Pheno44 | Net100_Node23 | Cerebellum | Subcortical-cerebellum |
| Node (Amplitude) | Pheno45 | Net100_Node24 | Parietal | Central_executive|Attention |
| Node (Amplitude) | Pheno46 | Net100_Node25 | Frontal|Precentral | Central_executive |
| Node (Amplitude) | Pheno47 | Net100_Node26 | Parietal|Frontal | Attention|Central_executive |
| Node (Amplitude) | Pheno48 | Net100_Node27 | Precentral|Frontal|Supp_Motor_Area | Attention|Salience|Motor |
| Node (Amplitude) | Pheno49 | Net100_Node28 | Supp_Motor_Area|Frontal | Salience|Default_mode |
| Node (Amplitude) | Pheno50 | Net100_Node29 | Parietal | Central_executive|Salience |
| Node (Amplitude) | Pheno51 | Net100_Node30 | Paracentral | Motor |
| Node (Amplitude) | Pheno52 | Net100_Node31 | Frontal | Central_executive |
| Node (Amplitude) | Pheno53 | Net100_Node32 | Postcentral|Precentral | Motor|Attention |
| Node (Amplitude) | Pheno54 | Net100_Node33 | Temporal|Frontal|Supp_Motor_Area | Default_mode|Salience |
| Node (Amplitude) | Pheno55 | Net100_Node34 | Parietal|Postcentral|Precuneus | Attention |
| Node (Amplitude) | Pheno56 | Net100_Node35 | Postcentral|Precentral | Motor |
| Node (Amplitude) | Pheno57 | Net100_Node36 | Precuneus | Default_mode|Central_executive |
| Node (Amplitude) | Pheno58 | Net100_Node37 | Frontal | Central_executive|Salience |
| Node (Amplitude) | Pheno59 | Net100_Node38 | Subcortical | Subcortical-cerebellum |
| Node (Amplitude) | Pheno60 | Net100_Node39 | Precuneus|Parietal_Sup | Attention|Central_executive |
| Node (Amplitude) | Pheno61 | Net100_Node40 | Frontal | Central_executive |
| Node (Amplitude) | Pheno62 | Net100_Node41 | Temporal|Occipital | Attention|Visual |
| Node (Amplitude) | Pheno63 | Net100_Node42 | Temporal|Occipital | Attention|Visual |
| Node (Amplitude) | Pheno64 | Net100_Node43 | Temporal|Fusiform | Limbic|Default_mode |
| Node (Amplitude) | Pheno65 | Net100_Node44 | Frontal_Inf | Default_mode|Central_executive |
| Node (Amplitude) | Pheno66 | Net100_Node45 | Frontal | Salience|Default_mode |
| Node (Amplitude) | Pheno67 | Net100_Node46 | Temporal | Central_executive|Default_mode |
| Node (Amplitude) | Pheno68 | Net100_Node47 | Frontal | Central_executive|Salience|Default_mode |
| Node (Amplitude) | Pheno69 | Net100_Node48 | Temporal | Default_mode|Central_executive |
| Node (Amplitude) | Pheno70 | Net100_Node49 | Temporal_Mid|Angular | Default_mode |
| Node (Amplitude) | Pheno71 | Net100_Node50 | Orbitofrontal | Limbic |
| Node (Amplitude) | Pheno72 | Net100_Node51 | Cerebellum|Temporal | Subcortical-cerebellum |
| Node (Amplitude) | Pheno73 | Net100_Node52 | Cerebellum|Temporal | Subcortical-cerebellum |
| Node (Amplitude) | Pheno74 | Net100_Node53 | Frontal | Limbic |
| Node (Amplitude) | Pheno75 | Net100_Node54 | Temporal|Orbitofrontal | Limbic |
| Node (Amplitude) | Pheno76 | Net100_Node55 | Frontal_Sup | Limbic|Default_mode |

| **Supplementary Table 2: Information of IVs for significant exposure-outcome pairs in forward MR analyses** | | | | | | | | | | | | | | | |
| --- | --- | --- | --- | --- | --- | --- | --- | --- | --- | --- | --- | --- | --- | --- | --- |
| **exposure** | **Outcome** | **SNP** | **Effect_Allele** | **Other_Allele** | **Beta.Exposure** | **Beta.Outcome** | **Eaf.exposure** | **Eaf.outcome** | **Chr** | **POS** | **SE.exposure** | **SE.Outcome** | **Pval.exposure** | **Pval.outcome** | **F_statistic** |
| Pheno38 | ENDOMETRIOSIS FALLOPIAN TUBE | rs10116176 | C | T | -0.0429513 | 0.2564 | 0.36517 | 0.4086 | 9 | 71308336 | 0.0077097 | 0.1345 | 2.53E-08 | 0.05671 | 129.7012459 |
| rs10840478 | T | G | -0.0500577 | 0.1647 | 0.269657 | 0.3143 | 11 | 10737001 | 0.00844103 | 0.1431 | 3.02E-09 | 0.2496 | 118.4639428 |
| rs10895201 | A | G | 0.0851407 | -0.1251 | 0.120603 | 0.1196 | 11 | 101688535 | 0.0113475 | 0.2044 | 6.24E-14 | 0.5404 | 88.12140958 |
| rs10898863 | C | T | 0.0510448 | -0.218 | 0.414072 | 0.3356 | 11 | 70061301 | 0.00770022 | 0.1404 | 3.38E-11 | 0.1205 | 129.8609254 |
| rs28630519 | A | G | 0.0476101 | -0.2262 | 0.470994 | 0.5218 | 11 | 69794751 | 0.00748413 | 0.1336 | 2.00E-10 | 0.0904191 | 133.6104123 |
| rs7080018 | G | A | -0.0681572 | 0.1536 | 0.481295 | 0.4761 | 10 | 134301505 | 0.0074326 | 0.1317 | 4.73E-20 | 0.2436 | 134.5367294 |
| rs7302816 | C | A | 0.0515241 | -0.2333 | 0.195739 | 0.09257 | 12 | 89950320 | 0.00942113 | 0.2292 | 4.53E-08 | 0.3089 | 106.1398893 |
| rs9373978 | C | T | -0.0862829 | 0.3583 | 0.187751 | 0.1222 | 6 | 97056255 | 0.0095154 | 0.202 | 1.22E-19 | 0.0760992 | 105.088351 |
| Pheno20 | ADENOMYOSIS | rs11143801 | C | T | 0.0502935 | 0.07 | 0.375992 | 0.3368 | 9 | 71426328 | 0.00778619 | 0.0324 | 1.05E-10 | 0.0305499 | 128.4270863 |
| rs11187838 | A | G | 0.100742 | 0.0455 | 0.435403 | 0.3436 | 10 | 96038686 | 0.00756741 | 0.0322 | 1.96E-40 | 0.1579 | 132.1400182 |
| rs17853847 | C | T | -0.0464629 | 0.024 | 0.338903 | 0.3626 | 20 | 1895842 | 0.00832515 | 0.0319 | 2.39E-08 | 0.4515 | 120.1128743 |
| rs1939429 | G | T | 0.0577117 | 0.0331 | 0.198152 | 0.2114 | 11 | 101597305 | 0.00947637 | 0.0377 | 1.13E-09 | 0.3802 | 105.5211748 |
| rs34199493 | T | C | -0.0783395 | -0.0479 | 0.429272 | 0.5209 | 11 | 69971363 | 0.00764864 | 0.0307 | 1.28E-24 | 0.1184 | 130.7366663 |
| rs429358 | C | T | -0.0904149 | -0.026 | 0.151134 | 0.1833 | 19 | 45411941 | 0.0105105 | 0.0405 | 7.81E-18 | 0.5208 | 95.13892729 |
| rs4497325 | G | A | -0.0876351 | -0.0487 | 0.491758 | 0.4957 | 10 | 134302745 | 0.00752195 | 0.0307 | 2.28E-31 | 0.112 | 132.9386257 |
| rs55766546 | G | C | 0.133362 | 0.117 | 0.0297791 | 0.007162 | 7 | 14741152 | 0.0221131 | 0.1861 | 1.63E-09 | 0.5297 | 45.22014983 |
| rs7096226 | T | C | -0.0601732 | -0.0116 | 0.151172 | 0.2584 | 10 | 134607938 | 0.0109487 | 0.0358 | 3.89E-08 | 0.745 | 91.33118044 |
| rs72931796 | T | C | -0.0768081 | -0.0662 | 0.127971 | 0.1091 | 11 | 69834917 | 0.0112499 | 0.0493 | 8.64E-12 | 0.1796 | 88.88591856 |
| rs753002 | G | A | 0.0630801 | 0.013 | 0.469066 | 0.4478 | 11 | 10739243 | 0.0075577 | 0.0308 | 7.03E-17 | 0.6743 | 132.3097894 |
| rs7766042 | C | T | -0.0811435 | -0.1176 | 0.104354 | 0.1251 | 6 | 1366718 | 0.0123613 | 0.047 | 5.23E-11 | 0.01244 | 80.89421786 |
| rs7951108 | G | A | -0.054186 | -0.0076 | 0.399686 | 0.4765 | 11 | 69816564 | 0.00778122 | 0.0309 | 3.31E-12 | 0.8052 | 128.5091149 |
| rs9899649 | C | T | -0.0683519 | 0.0346 | 0.202083 | 0.2237 | 17 | 19253613 | 0.00938221 | 0.0368 | 3.21E-13 | 0.347 | 106.5801869 |
| Pheno44 | ADENOMYOSIS | rs11143801 | C | T | 0.0431358 | 0.07 | 0.376012 | 0.3368 | 9 | 71426328 | 0.00784061 | 0.0324 | 3.76E-08 | 0.0305499 | 127.5357013 |
| rs11187838 | A | G | 0.0709818 | 0.0455 | 0.435305 | 0.3436 | 10 | 96038686 | 0.00762092 | 0.0322 | 1.23E-20 | 0.1579 | 131.2122021 |
| rs1964463 | G | A | -0.0707712 | -0.0035 | 0.249847 | 0.2711 | 2 | 114069021 | 0.00877456 | 0.0345 | 7.29E-16 | 0.9189 | 113.9610072 |
| rs34199493 | T | C | -0.0525595 | -0.0479 | 0.429154 | 0.5209 | 11 | 69971363 | 0.00770361 | 0.0307 | 8.93E-12 | 0.1184 | 129.8037797 |
| rs3798293 | G | A | -0.0703947 | -0.0119 | 0.213053 | 0.1849 | 6 | 97033370 | 0.009253 | 0.0395 | 2.79E-14 | 0.763001 | 108.0684854 |
| rs4559657 | T | C | 0.057634 | 0.0595 | 0.204001 | 0.2312 | 11 | 101701370 | 0.00940406 | 0.0364 | 8.86E-10 | 0.1026 | 106.3325516 |
| rs78581380 | G | T | -0.0747282 | -0.1076 | 0.109167 | 0.1381 | 6 | 1365073 | 0.0121224 | 0.0451 | 7.07E-10 | 0.0170498 | 82.48842599 |
| rs7907962 | G | A | -0.063265 | -0.0548 | 0.468437 | 0.5012 | 10 | 134287486 | 0.00779458 | 0.0308 | 4.80E-16 | 0.0750499 | 128.2888488 |

| **Supplementary Table 3: Significant results of forward MR** | | | | | | | | | | | | |
| --- | --- | --- | --- | --- | --- | --- | --- | --- | --- | --- | --- | --- |
| **Exposure** | **Outcome** | **method** | **nsnp** | **beta** | **se (standard error)** | P-value | **low_CI 95% of beta** | **up_CI 95% of beta** | **OR (Odd Ratio)** | **low_CI 95% of OR** | **up_CI 95% of OR** | PFDR |
| Pheno38 | ENDOMETRIOSIS FALLOPIAN TUBE | MR Egger | 8 | 0.311034701 | 3.842777071 | 0.938121962 | -7.220808358 | 7.842877761 | 1.364836582 | 0.000731211 | 2547.525464 | 0.029823552 |
| Weighted median | -3.653901659 | 1.136511724 | 0.001304379 | -5.881464639 | -1.42633868 | 0.025889918 | 0.002790695 | 0.240186715 |
| Inverse variance weighted | -3.475648272 | 0.929343434 | 0.000184096 | -5.297161401 | -1.654135142 | 0.030941769 | 0.005005783 | 0.191257395 |
| Simple mode | -4.365544598 | 1.75416425 | 0.04167734 | -7.803706529 | -0.927382667 | 0.012707733 | 0.000408219 | 0.395587741 |
| Weighted mode | -4.267402438 | 1.603483672 | 0.032404458 | -7.410230436 | -1.124574441 | 0.014018149 | 0.000605031 | 0.324790656 |
| Pheno20 | ADENOMYOSIS | MR Egger | 14 | 0.884606009 | 0.56170534 | 0.141272074 | -0.216336457 | 1.985548474 | 2.422029945 | 0.805464252 | 7.283040851 | 0.045710784 |
| Weighted median | 0.473843184 | 0.176854935 | 0.007378155 | 0.127207511 | 0.820478856 | 1.606155096 | 1.135652654 | 2.27158734 |
| Inverse variance weighted | 0.446849427 | 0.133902479 | 0.000846496 | 0.184400568 | 0.709298286 | 1.563378879 | 1.202497409 | 2.032564479 |
| Simple mode | 0.442085006 | 0.274528449 | 0.131326043 | -0.095990754 | 0.980160767 | 1.555948 | 0.908472415 | 2.664884632 |
| Weighted mode | 0.449024024 | 0.216872252 | 0.05888135 | 0.023954409 | 0.874093639 | 1.566782297 | 1.024243621 | 2.396702032 |
| Pheno44 | ADENOMYOSIS | MR Egger | 8 | -0.828066925 | 1.181703221 | 0.50971304 | -3.144205238 | 1.488071388 | 0.436893018 | 0.043101166 | 4.428546331 | 0.011076669 |
| Weighted median | 0.787187671 | 0.265540684 | 0.003032038 | 0.266727931 | 1.307647412 | 2.197208456 | 1.305685161 | 3.697464859 |
| Inverse variance weighted | 0.742032553 | 0.194556157 | 0.000136749 | 0.360702484 | 1.123362622 | 2.100199947 | 1.43433666 | 3.075177495 |
| Simple mode | 0.915754916 | 0.427138775 | 0.069231553 | 0.078562917 | 1.752946914 | 2.498660818 | 1.081731412 | 5.771586009 |
| Weighted mode | 0.804956529 | 0.388204512 | 0.076814568 | 0.044075686 | 1.565837372 | 2.236599269 | 1.045061448 | 4.786681491 |

| **Supplementary Table 4: Information of IVs for significant exposure-outcome pairs in reverse MR analyses** | | | | | | | | | | | | | | | |
| --- | --- | --- | --- | --- | --- | --- | --- | --- | --- | --- | --- | --- | --- | --- | --- |
| **Exposure** | **outcome** | **SNP** | **Effect_Allele** | **Other_Allele** | **Beta.Exposure** | **Beta.Outcome** | **Eaf.exposure** | **Eaf.outcome** | **Chr** | **POS** | **SE.exposure** | **SE.Outcome** | **Pval.exposure** | **Pval.outcome** | **F_statistic** |
| Endometriosis of ovary | Pheno932 | rs1023692 | C | T | -0.1718 | -0.00375841 | 0.7484 | 0.765115 | 2 | 67868756 | 0.0304 | 0.00882497 | 1.62E-08 | 0.670192 | 32.89382563 |
| rs11031005 | C | T | -0.2744 | 0.0229759 | 0.1693 | 0.144527 | 11 | 30226356 | 0.0358 | 0.0106634 | 1.94E-14 | 0.0311892 | 27.93218713 |
| rs113913727 | C | A | 0.2068 | -0.0155114 | 0.1499 | 0.126377 | 6 | 19745853 | 0.0369 | 0.0113053 | 2.07E-08 | 0.170048 | 27.0995203 |
| rs1209731 | C | T | 0.5298 | -0.0211773 | 0.9788 | 0.9787715 | 1 | 169324793 | 0.096 | 0.0259905 | 3.38E-08 | 0.415182 | 10.41637812 |
| rs12213593 | A | T | 0.1725 | -0.00866374 | 0.2423 | 0.222247 | 6 | 152896250 | 0.0307 | 0.00906016 | 1.91E-08 | 0.338948 | 32.5723876 |
| rs12331471 | C | T | -0.2334 | 0.0249178 | 0.2457 | 0.283893 | 4 | 56001509 | 0.031 | 0.00827087 | 4.91E-14 | 0.00258914 | 32.25717094 |
| rs17694933 | A | G | 0.1684 | -0.00763915 | 0.4227 | 0.431584 | 9 | 22164309 | 0.0265 | 0.00759589 | 2.19E-10 | 0.314562 | 37.73480374 |
| rs3820687 | T | A | 0.2048 | -0.00648728 | 0.2292 | 0.223815 | 1 | 22357229 | 0.0314 | 0.00897613 | 7.11E-11 | 0.469849 | 31.84625157 |
| rs57689380 | C | T | 0.3649 | -0.0142645 | 0.05709 | 0.0381905 | 6 | 151734998 | 0.0579 | 0.0194662 | 2.85E-10 | 0.463693 | 17.27067874 |
| rs58415480 | G | C | 0.2833 | -0.0205989 | 0.2296 | 0.152618 | 6 | 152562271 | 0.0319 | 0.0104081 | 6.50E-19 | 0.0478009 | 31.34709402 |
| rs851984 | A | G | 0.1577 | 0.00025815 | 0.4441 | 0.394458 | 6 | 152023191 | 0.0264 | 0.00771805 | 2.21E-09 | 0.973318 | 37.8777386 |

| **Supplementary Table 5: Significant results of reverse MR** | | | | | | | | | | | | |
| --- | --- | --- | --- | --- | --- | --- | --- | --- | --- | --- | --- | --- |
| **Exposure** | **Outcome** | **method** | **nsnp** | **beta** | **se (standard error)** | P-value | **low_CI 95% of beta** | **up_CI 95% of beta** | **OR (Odd Ratio)** | **low_CI 95% of OR** | **up_CI 95% of OR** | PFDR |
| Pheno932 | Endometriosis of ovary | MR Egger | 11 | -0.106689126 | 0.048751596 | 0.056395006 | -0.202242253 | -0.011135999 | 0.898805045 | 0.816897008 | 0.988925777 | 0.0103376 |
| Weighted median | -0.04893996 | 0.018813839 | 0.009287811 | -0.085815085 | -0.012064835 | 0.9522383 | 0.917763924 | 0.988007653 |
| Inverse variance weighted | -0.054421737 | 0.013518483 | 5.68E-05 | -0.080917963 | -0.027925511 | 0.947032624 | 0.922269349 | 0.972460802 |
| Simple mode | -0.048629805 | 0.031539025 | 0.154126581 | -0.110446293 | 0.013186684 | 0.952533688 | 0.89543442 | 1.013274012 |
| Weighted mode | -0.054075332 | 0.030514979 | 0.106789472 | -0.113884691 | 0.005734026 | 0.947360737 | 0.892360847 | 1.005750497 |

| **Supplementary Table 6: Heterogeneity analyses for significant exposure-outcome pairs.** | | | | | |
| --- | --- | --- | --- | --- | --- |
| **Exposure** | **Outcome** | **Method** | **Q** | **Q_df** | **Q_pval** |
| Pheno38 | ENDOMETRIOSIS FALLOPIAN TUBE | Inverse variance weighted | 2.16657352 | 7 | 0.950048303 |
| MR Egger | 1.135234708 | 6 | 0.979962785 |
| Pheno20 | ADENOMYOSIS | Inverse variance weighted | 11.91451029 | 13 | 0.534666211 |
| MR Egger | 11.27055275 | 12 | 0.505885649 |
| Pheno44 | Inverse variance weighted | 6.183157306 | 7 | 0.518533416 |
| MR Egger | 4.36859373 | 6 | 0.626927381 |
| Endometriosis of ovary | Pheno932 | Inverse variance weighted | 7.143479973 | 10 | 0.711833698 |
| MR Egger | 5.898302696 | 9 | 0.750051896 |
